# Supplementary material for: Mixed-matrix membranes for CO2 separation: role of the third component
Source: Royal Society of Chemistry journal article supplement (doi:10.1039/c9ta09012f), 2019-01-01
Supplement: c9ta09012f1.pdf [file c9ta09012f1.pdf]

## Supplementary Information

# Mixed-Matrix Membranes for CO<sub>2</sub> Separation: Role of the Third Component

Xiangyu Guo,<sup>a,b</sup> Zhihua Qiao,<sup>a,b</sup> Dahuan Liu<sup>\*c,d</sup> and Chongli Zhong<sup>\*a,b,c,d</sup>

<sup>a</sup> State Key Laboratory of Separation Membranes and Membrane Processes, Tianjin Polytechnic University, Tianjin 300387, China.

<sup>b</sup> School of Chemistry and Chemical Engineering, Tianjin Polytechnic University, Tianjin 300387, China.

<sup>c</sup> College of Chemical Engineering, Beijing University of Chemical Technology, Beijing 100029, China.

<sup>d</sup> Beijing Advanced Innovation Center for Soft Matter Science and Engineering, Beijing 100029, China

Correspondence to: [zhongchongli@tjpu.edu.cn](mailto:zhongchongli@tjpu.edu.cn), [liudh@mail.buct.edu.cn](mailto:liudh@mail.buct.edu.cn)

Table S1. Summary of the reported MMMs containing small molecules as the third component for CO<sub>2</sub> separation. The literatures are ordered chronologically in each category (ILs, Organic silanes, Metal ions, and other small molecules).

| Filler                       | Polymer        | The third component                                     | Loading of filler  | Loading of the third component | Feed gas                                                                             | Operation conditions | CO <sub>2</sub> permeability (Barrer)                                             | CO <sub>2</sub> /CH <sub>4</sub> selectivity | CO <sub>2</sub> /N <sub>2</sub> selectivity | CO <sub>2</sub> /H <sub>2</sub> selectivity | Methodology                  | Role of the third component                                                                                 | Published year and ref. |
|------------------------------|----------------|---------------------------------------------------------|--------------------|--------------------------------|--------------------------------------------------------------------------------------|----------------------|-----------------------------------------------------------------------------------|----------------------------------------------|---------------------------------------------|---------------------------------------------|------------------------------|-------------------------------------------------------------------------------------------------------------|-------------------------|
| SAPO-34                      | poly(vinyl-IL) | [emim][TF <sub>2</sub> N]                               | 10 wt%             | 0                              | CO <sub>2</sub> , CH <sub>4</sub> , N <sub>2</sub>                                   | 23 °C, 0.1 MPa       | 13.9                                                                              | 35                                           | 35                                          | -                                           | Direct physical blending     | Eliminating interfacial voids                                                                               | 2010 <sup>58</sup>      |
|                              |                |                                                         | 10 wt%             | 18 wt%                         |                                                                                      |                      | 72                                                                                | 30                                           | 44                                          | -                                           |                              |                                                                                                             |                         |
| ZSM-5                        | 6FDA-Durene    | [bmim][TF <sub>2</sub> N]                               | 15 wt%             | 0                              | CO <sub>2</sub> , CH <sub>4</sub> , N <sub>2</sub>                                   | 35 °C, 0.1 MPa       | 1492                                                                              | 7.4                                          | 9.1                                         | -                                           | Direct physical blending     | Eliminating interfacial voids                                                                               | 2014 <sup>59</sup>      |
|                              |                |                                                         | 15 wt%             | 9 wt%                          |                                                                                      |                      | 441                                                                               | 21.1                                         | 18.5                                        | -                                           |                              |                                                                                                             |                         |
| EST-10                       | Chitosan       | [emim][Ac]                                              | 5 wt%              | 0                              | CO <sub>2</sub> , N <sub>2</sub>                                                     | 25 °C, 0.5 MPa       | ~120                                                                              | -                                            | ~4                                          | -                                           | Direct physical blending     | 1. Eliminating interfacial voids;<br>2. Increasing CO <sub>2</sub> solubility                               | 2014 <sup>60</sup>      |
|                              |                |                                                         | 5 wt%              | 5 wt%                          |                                                                                      |                      | ~220                                                                              | -                                            | ~12                                         | -                                           |                              |                                                                                                             |                         |
| SAPO-34                      | PES            | [emim][TF <sub>2</sub> N]                               | 20 wt%             | 0                              | CO <sub>2</sub> , CH <sub>4</sub>                                                    | RT, 3.0 MPa          | 85.7 (GPU)                                                                        | 20.7                                         | -                                           | -                                           | Direct physical blending     | 1. Eliminating interfacial voids;<br>2. Increasing CO <sub>2</sub> solubility                               | 2014 <sup>61</sup>      |
|                              |                |                                                         | 20 wt%             | 20 wt%                         |                                                                                      |                      | 300 (GPU)                                                                         | 62.6                                         | -                                           | -                                           |                              |                                                                                                             |                         |
| ZIF-8                        | PSF            | [bmim][Tf <sub>2</sub> N]                               | 6 vol%             | 0                              | CO <sub>2</sub> /CH <sub>4</sub> (50/50),<br>CO <sub>2</sub> /N <sub>2</sub> (50/50) | 30 °C, 0.6 MPa       | 420 (CO <sub>2</sub> /CH <sub>4</sub> )<br>464 (CO <sub>2</sub> /N <sub>2</sub> ) | 19.1                                         | 29.7                                        | -                                           | Encapsulation                | 1. Reducing effective cage size;<br>2. Increasing CO <sub>2</sub> solubility                                | 2015 <sup>64</sup>      |
|                              |                |                                                         | 6 vol% (composite) | 1.4 ILs per SOD cage           |                                                                                      |                      | 311 (CO <sub>2</sub> /CH <sub>4</sub> )<br>350 (CO <sub>2</sub> /N <sub>2</sub> ) | 38.3                                         | 116                                         | -                                           |                              |                                                                                                             |                         |
| ZIF-8                        | Pebax 1657     | [bmim][Tf <sub>2</sub> N]                               | 15 wt%             | 0                              | CO <sub>2</sub> , CH <sub>4</sub> , N <sub>2</sub> , H <sub>2</sub>                  | 25 °C, 0.1 MPa       | 128                                                                               | 19.5                                         | 39.5                                        | 8.3                                         | Encapsulation                | 1. Eliminating interfacial voids;<br>2. Reducing effective pore size;<br>3. Improving mechanical properties | 2016 <sup>65</sup>      |
|                              |                |                                                         | 15 wt% (composite) | ~16.5 wt% of composite         |                                                                                      |                      | 104.9                                                                             | 34.8                                         | 83.9                                        | 9.8                                         |                              |                                                                                                             |                         |
| NH <sub>2</sub> -MIL-101(Cr) | PIM-1          | [C <sub>3</sub> NH <sub>2</sub> bim][Tf <sub>2</sub> N] | 5 wt%              | 0                              | CO <sub>2</sub> , N <sub>2</sub>                                                     | 25 °C, 0.3 MPa       | 3200                                                                              | -                                            | 17.5                                        | -                                           | Encapsulation                | 1. Increasing CO <sub>2</sub> solubility;<br>2. Increasing CO <sub>2</sub> diffusion selectivity            | 2016 <sup>66</sup>      |
|                              |                |                                                         | 5 wt% (composite)  | NA                             |                                                                                      |                      | 2979                                                                              | -                                            | 37.2                                        | -                                           |                              |                                                                                                             |                         |
| HKUST-1                      | 6FDA-Durene    | [emim][TF <sub>2</sub> N]                               | 10 wt%             | 0                              | CO <sub>2</sub> , CH <sub>4</sub> , N <sub>2</sub>                                   | 25 °C, 0.2 MPa       | 1310                                                                              | 19                                           | 17.5                                        | -                                           | Filler surface modification  | Eliminating interfacial voids                                                                               | 2016 <sup>67</sup>      |
|                              |                |                                                         | 10 wt% (composite) | 13.8 wt% of HKUST-1            |                                                                                      |                      | 1100                                                                              | 28.5                                         | 27                                          | -                                           |                              |                                                                                                             |                         |
| ZIF-8                        | Pebax 1657     | [bmim][NTf <sub>2</sub> ]                               | 15 wt%             | 0                              | CO <sub>2</sub> , CH <sub>4</sub> , N <sub>2</sub>                                   | 23 °C, 0.1 MPa       | ~107                                                                              | 16.5                                         | 35                                          | -                                           | Direct physical blending     | 1. Eliminating interfacial voids;<br>2. Increase fractional free volume                                     | 2017 <sup>62</sup>      |
|                              |                |                                                         | 15 wt%             | 10 wt%                         |                                                                                      |                      | ~120                                                                              | 17                                           | 42.1                                        | -                                           |                              |                                                                                                             |                         |
| Ag NPs                       | Pebax 1657     | [bmim][BF <sub>4</sub> ]                                | 0.5 wt%            | 0                              | CO <sub>2</sub> , CH <sub>4</sub> , N <sub>2</sub>                                   | 35 °C, 1.0 MPa       | 220                                                                               | 36.7                                         | 118.9                                       | -                                           | Direct physical blending     | 1. Eliminating interfacial voids;<br>2. Increasing CO <sub>2</sub> solubility                               | 2017 <sup>63</sup>      |
|                              |                |                                                         | 0.5 wt%            | 50 wt%                         |                                                                                      |                      | 180                                                                               | 61                                           | 187.5                                       | -                                           |                              |                                                                                                             |                         |
| SAPO-34                      | PSF            | [emim][TF <sub>2</sub> N]                               | 5 wt%              | 0                              | CO <sub>2</sub> , CH <sub>4</sub> , N <sub>2</sub>                                   | 25 °C, 0.375 MPa     | 6.53 (GPU)                                                                        | 3.47                                         | 5.67                                        | -                                           | Filler surface modification  | 1. Eliminating interfacial voids;<br>2. Increasing CO <sub>2</sub> solubility                               | 2017 <sup>68</sup>      |
|                              |                |                                                         | 5 wt% (composite)  | 0.361 wt% of composite         |                                                                                      |                      | 7.24 (GPU)                                                                        | 20.35                                        | 18.82                                       | -                                           |                              |                                                                                                             |                         |
| ZIF-8                        | Pebax 1657     | [DnBM][Cl]                                              | 8 wt%              | 0                              | CO <sub>2</sub> , CH <sub>4</sub> , N <sub>2</sub>                                   | 30 °C, 0.2 MPa       | 288                                                                               | 21                                           | 41                                          | 7                                           | Polymer modification with IL | Eliminating interfacial voids                                                                               | 2017 <sup>71</sup>      |
|                              |                |                                                         | 8 wt%              | NA                             |                                                                                      |                      | 261                                                                               | 36                                           | 71                                          | 10                                          |                              |                                                                                                             |                         |

Table S1. (continued)

| Filler               | Polymer             | The third component                           | Loading of filler   | Loading of the third component | Feed gas                                                                                                                                          | Operation conditions            | CO <sub>2</sub> permeability (Barrer)                                                 | CO <sub>2</sub> /CH <sub>4</sub> selectivity | CO <sub>2</sub> /N <sub>2</sub> selectivity | CO <sub>2</sub> /H <sub>2</sub> selectivity | Methodology                          | Role of the third component                                                                                        | Published year and ref. |
|----------------------|---------------------|-----------------------------------------------|---------------------|--------------------------------|---------------------------------------------------------------------------------------------------------------------------------------------------|---------------------------------|---------------------------------------------------------------------------------------|----------------------------------------------|---------------------------------------------|---------------------------------------------|--------------------------------------|--------------------------------------------------------------------------------------------------------------------|-------------------------|
| GO                   | Pebax 1657          | 1-(3-aminopropyl)-3-methylimidazolium bromide | 0.2 wt%             | 0                              | CO <sub>2</sub> , CH <sub>4</sub> , N <sub>2</sub> , H <sub>2</sub><br>CO <sub>2</sub> /H <sub>2</sub><br>CO <sub>2</sub> /N <sub>2</sub> (30/70) | 25 °C, 0.4 MPa                  | 88 (single gas)                                                                       | -                                            | 44 (single gas)                             | 8.0 (single gas)                            | Filler surface modification          | 1. Eliminating interfacial voids;<br>2. Facilitating CO <sub>2</sub> transport                                     | 2018 <sup>69</sup>      |
|                      |                     |                                               | 0.2 wt% (composite) | NA                             |                                                                                                                                                   |                                 | 143 (single gas)<br>118.6 (gas mixture)                                               | -                                            | 79.4 (single gas)<br>71 (gas mixture)       | 13.8 (single gas)<br>9.5 (gas mixture)      |                                      |                                                                                                                    |                         |
| Zeolite 4A           | PSF                 | [APTMS][Ac]                                   | 30 wt%              | 0                              | CO <sub>2</sub> /CH <sub>4</sub> ,<br>CO <sub>2</sub> /N <sub>2</sub>                                                                             | 25 °C, 1.0 MPa                  | ~16.5 (CO <sub>2</sub> /CH <sub>4</sub> )<br>~17.5 (CO <sub>2</sub> /N <sub>2</sub> ) | ~18.5                                        | ~19.5                                       | -                                           | Filler surface modification          | 1. Eliminating interfacial voids;<br>2. Increasing CO <sub>2</sub> solubility                                      | 2018 <sup>70</sup>      |
|                      |                     |                                               | 30 wt%              | NA                             |                                                                                                                                                   |                                 | ~14.5 (CO <sub>2</sub> /CH <sub>4</sub> )<br>~15 (CO <sub>2</sub> /N <sub>2</sub> )   | ~30                                          | ~34                                         | -                                           |                                      |                                                                                                                    |                         |
| SAPO-34              | PSF                 | [bmim][Ac]                                    | 5 wt%               | 0                              | CO <sub>2</sub> , N <sub>2</sub>                                                                                                                  | 30 °C, 0.35 MPa                 | 13 (GPU)                                                                              | -                                            | ~4.3                                        | -                                           | MMMs post-impregnated in IL solution | Eliminating interfacial voids                                                                                      | 2018 <sup>72</sup>      |
|                      |                     |                                               | 5 wt%               | 3.95 wt%                       |                                                                                                                                                   |                                 | 2 (GPU)                                                                               | -                                            | 39.6                                        | -                                           |                                      |                                                                                                                    |                         |
| Zeolite 4A           | PES                 | APDEMS                                        | 20 wt%              | 0                              | CO <sub>2</sub> , CH <sub>4</sub>                                                                                                                 | 35 °C, 1.0 MPa                  | ~1.45                                                                                 | 28                                           | -                                           | -                                           | Filler surface modification          | Reducing pore blockage                                                                                             | 2006 <sup>33</sup>      |
|                      |                     |                                               | 20 wt%              | NA                             |                                                                                                                                                   |                                 | ~1.75                                                                                 | 30.5                                         | -                                           | -                                           |                                      |                                                                                                                    |                         |
| MIL-53(Al)           | Ultem® 1000         | APTMS                                         | 10 wt%              | 0                              | CO <sub>2</sub> , N <sub>2</sub>                                                                                                                  | 25 °C, 0.5 MPa                  | 22.5 (GPU)                                                                            | -                                            | 24.5                                        | -                                           | Filler modification                  | 1. Improving filler distribution;<br>2. Eliminating interfacial voids;<br>3. Increasing CO <sub>2</sub> solubility | 2016 <sup>73</sup>      |
|                      |                     |                                               | 10 wt%              | NA                             |                                                                                                                                                   |                                 | 24.1 (GPU)                                                                            | -                                            | 41.1                                        | -                                           |                                      |                                                                                                                    |                         |
| Montmorillonite      | Polyvinylamine acid | APTES                                         | ~57 wt%             | ~38 wt%                        | CO <sub>2</sub> /N <sub>2</sub> (15/85),<br>CO <sub>2</sub> /CH <sub>4</sub> (10/90),<br>CO <sub>2</sub> /H <sub>2</sub> (40/60)                  | 50 °C, 0.11-3.0 MPa             | ~820 (GPU)                                                                            | 140                                          | 125                                         | 80                                          | Filler modification                  | Collaboratively control filler orientation                                                                         | 2016 <sup>74</sup>      |
| TiO <sub>2</sub>     | Pebax 1657          | APDEMS                                        | 3 wt%               | 0                              | CO <sub>2</sub> , N <sub>2</sub>                                                                                                                  | 25 °C, 2.0 MPa                  | ~148                                                                                  | -                                            | ~74                                         | -                                           | Filler surface modification          | 1. Eliminating interfacial voids;<br>2. Increasing CO <sub>2</sub> solubility                                      | 2017 <sup>75</sup>      |
|                      |                     |                                               | 3 wt%               | ~5.6 wt% of filler             |                                                                                                                                                   |                                 | 188.6                                                                                 | -                                            | 84.9                                        | -                                           |                                      |                                                                                                                    |                         |
| ZIF-8                | Pebax 1657          | APTES                                         | 40 wt%              | 0                              | CO <sub>2</sub> , CH <sub>4</sub>                                                                                                                 | 35 °C, 0.5 MPa                  | ~950                                                                                  | 10.6                                         | -                                           | -                                           | Filler surface modification          | Eliminating interfacial voids                                                                                      | 2017 <sup>76</sup>      |
|                      |                     |                                               | 40 wt%              | NA                             |                                                                                                                                                   |                                 | ~910                                                                                  | 16                                           | -                                           | -                                           |                                      |                                                                                                                    |                         |
| GO                   | Pebax 1657          | APTES                                         | 0.9 wt%             | 0                              | CO <sub>2</sub> /CH <sub>4</sub> (30/70),<br>CO <sub>2</sub> /N <sub>2</sub> (20/80)                                                              | 35 °C, 0.2 MPa, humid condition | 630                                                                                   | 20.5                                         | 43.5                                        | -                                           | Filler surface modification          | 1. Eliminating interfacial voids;<br>2. Facilitating CO <sub>2</sub> transport                                     | 2019 <sup>77</sup>      |
|                      |                     |                                               | 0.9 wt%             | NA                             |                                                                                                                                                   |                                 | 934.3                                                                                 | 40.9                                         | 71.1                                        | -                                           |                                      |                                                                                                                    |                         |
| POSS® Octa Amic Acid | Matrimid® 5218      | Zn <sup>2+</sup>                              | 20 wt%              | 0                              | CO <sub>2</sub> , CH <sub>4</sub> , N <sub>2</sub>                                                                                                | 35 °C, 1.0 MPa                  | 5.3                                                                                   | 37.2                                         | 27.9                                        | -                                           | Membrane ion binding                 | 1. Reducing effective pore size;<br>2. Facilitating CO <sub>2</sub> transport                                      | 2010 <sup>78</sup>      |
|                      |                     |                                               | 20 wt%              | NA                             |                                                                                                                                                   |                                 | 3.4                                                                                   | 62.8                                         | 30.9                                        | -                                           |                                      |                                                                                                                    |                         |
| ZIF-108              | PSF                 | Co <sup>2+</sup>                              | 0.5 wt%             | 0                              | CO <sub>2</sub> /CH <sub>4</sub> (50/50),<br>CO <sub>2</sub> /N <sub>2</sub> (50/50)                                                              | 25 °C, 0.5 MPa                  | ~26                                                                                   | ~8                                           | ~5.5                                        | -                                           | Partial ion substitution             | Increasing CO <sub>2</sub> solubility                                                                              | 2014 <sup>80</sup>      |
|                      |                     |                                               | 0.5 wt%             | Co/Zn = 0.06/0.94              |                                                                                                                                                   |                                 | ~170                                                                                  | ~13                                          | ~11.4                                       | -                                           |                                      |                                                                                                                    |                         |

Table S1. (continued)

| Filler                  | Polymer                    | The third component                        | Loading of filler | Loading of the third component | Feed gas                                                            | Operation conditions | CO <sub>2</sub> permeability (Barrer) | CO <sub>2</sub> /CH <sub>4</sub> selectivity | CO <sub>2</sub> /N <sub>2</sub> selectivity | CO <sub>2</sub> /H <sub>2</sub> selectivity | Methodology                           | Role of the third component                                                                                                 | Published year and ref. |                         |                            |                                            |          |   |                                                                     |                |             |       |       |                                         |                                       |                                                                                                                             |                    |          |                       |              |       |      |                                         |                         |                            |                                            |          |   |                                                                     |                |             |       |       |                                         |                                       |                                                                                                                             |                    |          |                       |              |       |      |                                         |                         |                            |                                            |          |   |                                                                     |                |             |       |       |                                         |                                       |                                                                                                                             |                    |          |                       |              |       |      |                                         |                         |                            |                                            |          |   |                                                                     |                |             |       |       |                                         |                                       |                                                                                                                             |                    |          |                       |              |       |      |                                         |                         |                            |                                            |          |   |                                                                     |                |             |       |       |                                         |                                       |                                                                                                                             |                    |          |                       |              |       |      |                                         |                         |                            |                                            |          |   |                                                                     |                |             |       |       |                                         |                                 |                                                                                                                             |                    |          |                       |              |       |      |                                         |                         |                            |                                            |          |   |                                                                     |                |             |       |       |                                        |                                 |                                                                                                                             |                    |          |                       |              |       |      |                                        |                         |                            |                                            |          |   |                                                                     |                |             |       |       |                                        |                                 |                                                                                                                             |                    |          |                       |              |       |     |                                        |                         |                            |                                            |        |   |                                                                     |                |             |       |       |                                        |                                 |                                                                                         |                    |        |                       |              |       |     |                                        |                         |                            |                                            |        |   |                                                                     |                |       |       |       |                                        |                                 |                                                                                         |                    |        |                       |       |       |     |                                        |                         |                            |                                            |        |   |                                                                     |                |       |       |       |     |                             |                                                                                         |                    |        |                |       |       |     |     |                         |                            |                                            |        |   |                                                                     |                |       |       |       |     |                          |                                                                                         |                    |        |        |       |       |     |     |           |                            |                                            |        |   |                                   |                |       |      |   |   |               |
|-------------------------|----------------------------|--------------------------------------------|-------------------|--------------------------------|---------------------------------------------------------------------|----------------------|---------------------------------------|----------------------------------------------|---------------------------------------------|---------------------------------------------|---------------------------------------|-----------------------------------------------------------------------------------------------------------------------------|-------------------------|-------------------------|----------------------------|--------------------------------------------|----------|---|---------------------------------------------------------------------|----------------|-------------|-------|-------|-----------------------------------------|---------------------------------------|-----------------------------------------------------------------------------------------------------------------------------|--------------------|----------|-----------------------|--------------|-------|------|-----------------------------------------|-------------------------|----------------------------|--------------------------------------------|----------|---|---------------------------------------------------------------------|----------------|-------------|-------|-------|-----------------------------------------|---------------------------------------|-----------------------------------------------------------------------------------------------------------------------------|--------------------|----------|-----------------------|--------------|-------|------|-----------------------------------------|-------------------------|----------------------------|--------------------------------------------|----------|---|---------------------------------------------------------------------|----------------|-------------|-------|-------|-----------------------------------------|---------------------------------------|-----------------------------------------------------------------------------------------------------------------------------|--------------------|----------|-----------------------|--------------|-------|------|-----------------------------------------|-------------------------|----------------------------|--------------------------------------------|----------|---|---------------------------------------------------------------------|----------------|-------------|-------|-------|-----------------------------------------|---------------------------------------|-----------------------------------------------------------------------------------------------------------------------------|--------------------|----------|-----------------------|--------------|-------|------|-----------------------------------------|-------------------------|----------------------------|--------------------------------------------|----------|---|---------------------------------------------------------------------|----------------|-------------|-------|-------|-----------------------------------------|---------------------------------------|-----------------------------------------------------------------------------------------------------------------------------|--------------------|----------|-----------------------|--------------|-------|------|-----------------------------------------|-------------------------|----------------------------|--------------------------------------------|----------|---|---------------------------------------------------------------------|----------------|-------------|-------|-------|-----------------------------------------|---------------------------------|-----------------------------------------------------------------------------------------------------------------------------|--------------------|----------|-----------------------|--------------|-------|------|-----------------------------------------|-------------------------|----------------------------|--------------------------------------------|----------|---|---------------------------------------------------------------------|----------------|-------------|-------|-------|----------------------------------------|---------------------------------|-----------------------------------------------------------------------------------------------------------------------------|--------------------|----------|-----------------------|--------------|-------|------|----------------------------------------|-------------------------|----------------------------|--------------------------------------------|----------|---|---------------------------------------------------------------------|----------------|-------------|-------|-------|----------------------------------------|---------------------------------|-----------------------------------------------------------------------------------------------------------------------------|--------------------|----------|-----------------------|--------------|-------|-----|----------------------------------------|-------------------------|----------------------------|--------------------------------------------|--------|---|---------------------------------------------------------------------|----------------|-------------|-------|-------|----------------------------------------|---------------------------------|-----------------------------------------------------------------------------------------|--------------------|--------|-----------------------|--------------|-------|-----|----------------------------------------|-------------------------|----------------------------|--------------------------------------------|--------|---|---------------------------------------------------------------------|----------------|-------|-------|-------|----------------------------------------|---------------------------------|-----------------------------------------------------------------------------------------|--------------------|--------|-----------------------|-------|-------|-----|----------------------------------------|-------------------------|----------------------------|--------------------------------------------|--------|---|---------------------------------------------------------------------|----------------|-------|-------|-------|-----|-----------------------------|-----------------------------------------------------------------------------------------|--------------------|--------|----------------|-------|-------|-----|-----|-------------------------|----------------------------|--------------------------------------------|--------|---|---------------------------------------------------------------------|----------------|-------|-------|-------|-----|--------------------------|-----------------------------------------------------------------------------------------|--------------------|--------|--------|-------|-------|-----|-----|-----------|----------------------------|--------------------------------------------|--------|---|-----------------------------------|----------------|-------|------|---|---|---------------|
| PDA NPs                 | Pebax 1657                 | Ag <sup>+</sup>                            | 10 wt%            | 0                              | CO <sub>2</sub> , CH <sub>4</sub>                                   | 30 °C, 0.2 MPa       | 94.6                                  | 17.6                                         | -                                           | -                                           | Ion chelating                         | Facilitating CO <sub>2</sub> transport                                                                                      | 2015 <sup>79</sup>      |                         |                            |                                            |          |   |                                                                     |                |             |       |       |                                         |                                       |                                                                                                                             |                    |          |                       |              |       |      |                                         |                         |                            |                                            |          |   |                                                                     |                |             |       |       |                                         |                                       |                                                                                                                             |                    |          |                       |              |       |      |                                         |                         |                            |                                            |          |   |                                                                     |                |             |       |       |                                         |                                       |                                                                                                                             |                    |          |                       |              |       |      |                                         |                         |                            |                                            |          |   |                                                                     |                |             |       |       |                                         |                                       |                                                                                                                             |                    |          |                       |              |       |      |                                         |                         |                            |                                            |          |   |                                                                     |                |             |       |       |                                         |                                       |                                                                                                                             |                    |          |                       |              |       |      |                                         |                         |                            |                                            |          |   |                                                                     |                |             |       |       |                                         |                                 |                                                                                                                             |                    |          |                       |              |       |      |                                         |                         |                            |                                            |          |   |                                                                     |                |             |       |       |                                        |                                 |                                                                                                                             |                    |          |                       |              |       |      |                                        |                         |                            |                                            |          |   |                                                                     |                |             |       |       |                                        |                                 |                                                                                                                             |                    |          |                       |              |       |     |                                        |                         |                            |                                            |        |   |                                                                     |                |             |       |       |                                        |                                 |                                                                                         |                    |        |                       |              |       |     |                                        |                         |                            |                                            |        |   |                                                                     |                |       |       |       |                                        |                                 |                                                                                         |                    |        |                       |       |       |     |                                        |                         |                            |                                            |        |   |                                                                     |                |       |       |       |     |                             |                                                                                         |                    |        |                |       |       |     |     |                         |                            |                                            |        |   |                                                                     |                |       |       |       |     |                          |                                                                                         |                    |        |        |       |       |     |     |           |                            |                                            |        |   |                                   |                |       |      |   |   |               |
|                         |                            |                                            | 10 wt%            | 18.5 wt% of filler             |                                                                     |                      | 150                                   | 25.9                                         | -                                           | -                                           |                                       |                                                                                                                             |                         | UiO-66                  | PIM-1                      | Ti <sup>4+</sup>                           | 5 wt%    | 0 | CO <sub>2</sub> , N <sub>2</sub>                                    | 25 °C, 0.2 MPa | 5340        | -     | 20.2  | -                                       | Partial ion substitution              | Increasing CO <sub>2</sub> solubility                                                                                       | 2015 <sup>81</sup> | 5 wt%    | NA                    | 13540        | -     | 20.5 | -                                       | PVI@CNT                 | Matrimid <sup>®</sup> 5218 | Zn <sup>2+</sup>                           | 7 wt%    | 0 | CO <sub>2</sub> /CH <sub>4</sub> (30/70)                            | 30 °C, 0.2 MPa | ~5.5        | ~41.5 | -     | -                                       | Ion chelating                         | Facilitating CO <sub>2</sub> transport                                                                                      | 2016 <sup>82</sup> | 7 wt%    | NA                    | ~11.6        | ~70   | -    | -                                       | PVI@CNT                 | Matrimid <sup>®</sup> 5218 | Cu <sup>2+</sup>                           | 7 wt%    | 0 | CO <sub>2</sub> /CH <sub>4</sub> (30/70)                            | 30 °C, 0.2 MPa | ~5.5        | ~41.5 | -     | -                                       | Ion chelating                         | Facilitating CO <sub>2</sub> transport                                                                                      | 2016 <sup>83</sup> | 7 wt%    | NA                    | ~10.4        | ~46.8 | -    | -                                       | PDA-GO                  | Pebax 1657                 | Zn <sup>2+</sup>                           | 1 wt%    | 0 | CO <sub>2</sub> /CH <sub>4</sub> (30/70)                            | 30 °C, 0.2 MPa | ~93         | ~23   | -     | -                                       | Ion chelating                         | Facilitating CO <sub>2</sub> transport                                                                                      | 2017 <sup>84</sup> | 1 wt%    | 34.2 wt% of filler    | 137.9        | 28.8  | -    | -                                       | ZIF-8                   | Pebax 2533                 | Ni <sup>2+</sup>                           | 10 wt%   | 0 | CO <sub>2</sub> /N <sub>2</sub> (20/80)                             | 25 °C, 0.2 MPa | 266         | -     | 33.8  | -                                       | <i>In-situ</i> synthesize Ni-Zn-ZIF-8 | Increasing CO <sub>2</sub> solubility                                                                                       | 2018 <sup>85</sup> | 10 wt%   | Ni/Zn=1/12            | 321          | -     | 42.8 | -                                       | SAPO-34                 | PES                        | 2-Hydroxy 5-Methyl Aniline                 | 20 wt%   | 0 | H <sub>2</sub> , CO <sub>2</sub> , CH <sub>4</sub>                  | 35 °C, 0.3 MPa | 5.77        | 37.0  | -     | 2.24 (H <sub>2</sub> /CO <sub>2</sub> ) | Direct physical blending        | 1. Eliminating interfacial voids;<br>2. Stiffening polymer matrix                                                           | 2012 <sup>86</sup> | 20 wt%   | 10 wt%                | 1.34         | 44.7  | -    | 3.96 (H <sub>2</sub> /CO <sub>2</sub> ) | ZSM-5                   | 6FDA-Durene                | Liquid Sulfolane                           | 15 wt%   | 0 | CO <sub>2</sub> , CH <sub>4</sub> , N <sub>2</sub> , H <sub>2</sub> | 35 °C, 0.2 MPa | 1492        | 7.3   | 9.1   | 1.3                                    | Direct physical blending        | Eliminating interfacial voids                                                                                               | 2013 <sup>87</sup> | 15 wt%   | 31 wt%                | 101          | 18.0  | 27.2 | 2.1                                    | GO                      | Ultem <sup>®</sup> 1000    | Ethylenediamine                            | 0.75 wt% | 0 | CO <sub>2</sub> , CH <sub>4</sub>                                   | 25 °C, 1.0 MPa | 1.926       | 58.4  | -     | -                                      | Filler surface modification     | 1. Eliminating interfacial voids;<br>2. Increasing CO <sub>2</sub> solubility;<br>3. Facilitating CO <sub>2</sub> transport | 2014 <sup>92</sup> | 0.75 wt% | NA                    | 1.570        | 142.7 | -   | -                                      | CMS                     | PES                        | Diethanolamine                             | 30 wt% | 0 | CO <sub>2</sub> , CH <sub>4</sub>                                   | 25 °C, 1.0 MPa | 44.69 (GPU) | 11.1  | -     | -                                      | Direct physical blending        | 1. Increasing CO <sub>2</sub> solubility<br>2. Facilitating CO <sub>2</sub> transport   | 2015 <sup>88</sup> | 30 wt% | 15 wt%                | 106.65 (GPU) | 51.39 | -   | -                                      | ZIF-90                  | Matrimid <sup>®</sup> 5218 | Ethylenediamine                            | 21 wt% | 0 | H <sub>2</sub> /CO <sub>2</sub> (50/50)                             | 25 °C, 0.2 MPa | 6     | -     | -     | 5.0 (H <sub>2</sub> /CO <sub>2</sub> ) | Blending and covalently bonding | 1. Reducing effective pore size;<br>2. Stiffening polymer matrix                        | 2015 <sup>89</sup> | 21 wt% | 0.05625 wt% of filler | 2     | -     | -   | 9.5 (H <sub>2</sub> /CO <sub>2</sub> ) | UiO-66-NH <sub>2</sub>  | Matrimid <sup>®</sup> 5218 | Phenyl acetyl                              | 23 wt% | 0 | CO <sub>2</sub> , N <sub>2</sub>                                    | RT, 0.24 MPa   | ~24   | -     | ~36.3 | -   | Filler surface modification | Eliminating interfacial voids                                                           | 2015 <sup>93</sup> | 23 wt% | 2-6% of filler | ~29   | -     | ~37 | -   | MWCNTs -NH <sub>2</sub> | Pebax 1657                 | Glycerol triacetate                        | 1 wt%  | 0 | H <sub>2</sub> , CO <sub>2</sub> , CH <sub>4</sub> , N <sub>2</sub> | 35 °C, 0.7 MPa | 202   | ~16.5 | ~51.8 | ~10 | Direct physical blending | 1. Improve filler distribution;<br>2. Increasing fractional free volume                 | 2017 <sup>90</sup> | 1 wt%  | 25 wt% | 1408  | ~14   | ~39 | ~13 | Zeolite Y | Matrimid <sup>®</sup> 5218 | Co <sup>2+</sup> -diamine-diketone complex | 15 wt% | 0 | CO <sub>2</sub> , CH <sub>4</sub> | 35 °C, 0.2 MPa | 17.52 | 43.3 | - | - | Encapsulation |
| UiO-66                  | PIM-1                      | Ti <sup>4+</sup>                           | 5 wt%             | 0                              | CO <sub>2</sub> , N <sub>2</sub>                                    | 25 °C, 0.2 MPa       | 5340                                  | -                                            | 20.2                                        | -                                           | Partial ion substitution              | Increasing CO <sub>2</sub> solubility                                                                                       | 2015 <sup>81</sup>      |                         |                            |                                            |          |   |                                                                     |                |             |       |       |                                         |                                       |                                                                                                                             |                    |          |                       |              |       |      |                                         |                         |                            |                                            |          |   |                                                                     |                |             |       |       |                                         |                                       |                                                                                                                             |                    |          |                       |              |       |      |                                         |                         |                            |                                            |          |   |                                                                     |                |             |       |       |                                         |                                       |                                                                                                                             |                    |          |                       |              |       |      |                                         |                         |                            |                                            |          |   |                                                                     |                |             |       |       |                                         |                                       |                                                                                                                             |                    |          |                       |              |       |      |                                         |                         |                            |                                            |          |   |                                                                     |                |             |       |       |                                         |                                       |                                                                                                                             |                    |          |                       |              |       |      |                                         |                         |                            |                                            |          |   |                                                                     |                |             |       |       |                                         |                                 |                                                                                                                             |                    |          |                       |              |       |      |                                         |                         |                            |                                            |          |   |                                                                     |                |             |       |       |                                        |                                 |                                                                                                                             |                    |          |                       |              |       |      |                                        |                         |                            |                                            |          |   |                                                                     |                |             |       |       |                                        |                                 |                                                                                                                             |                    |          |                       |              |       |     |                                        |                         |                            |                                            |        |   |                                                                     |                |             |       |       |                                        |                                 |                                                                                         |                    |        |                       |              |       |     |                                        |                         |                            |                                            |        |   |                                                                     |                |       |       |       |                                        |                                 |                                                                                         |                    |        |                       |       |       |     |                                        |                         |                            |                                            |        |   |                                                                     |                |       |       |       |     |                             |                                                                                         |                    |        |                |       |       |     |     |                         |                            |                                            |        |   |                                                                     |                |       |       |       |     |                          |                                                                                         |                    |        |        |       |       |     |     |           |                            |                                            |        |   |                                   |                |       |      |   |   |               |
|                         |                            |                                            | 5 wt%             | NA                             |                                                                     |                      | 13540                                 | -                                            | 20.5                                        | -                                           |                                       |                                                                                                                             |                         | PVI@CNT                 | Matrimid <sup>®</sup> 5218 | Zn <sup>2+</sup>                           | 7 wt%    | 0 | CO <sub>2</sub> /CH <sub>4</sub> (30/70)                            | 30 °C, 0.2 MPa | ~5.5        | ~41.5 | -     | -                                       | Ion chelating                         | Facilitating CO <sub>2</sub> transport                                                                                      | 2016 <sup>82</sup> | 7 wt%    | NA                    | ~11.6        | ~70   | -    | -                                       | PVI@CNT                 | Matrimid <sup>®</sup> 5218 | Cu <sup>2+</sup>                           | 7 wt%    | 0 | CO <sub>2</sub> /CH <sub>4</sub> (30/70)                            | 30 °C, 0.2 MPa | ~5.5        | ~41.5 | -     | -                                       | Ion chelating                         | Facilitating CO <sub>2</sub> transport                                                                                      | 2016 <sup>83</sup> | 7 wt%    | NA                    | ~10.4        | ~46.8 | -    | -                                       | PDA-GO                  | Pebax 1657                 | Zn <sup>2+</sup>                           | 1 wt%    | 0 | CO <sub>2</sub> /CH <sub>4</sub> (30/70)                            | 30 °C, 0.2 MPa | ~93         | ~23   | -     | -                                       | Ion chelating                         | Facilitating CO <sub>2</sub> transport                                                                                      | 2017 <sup>84</sup> | 1 wt%    | 34.2 wt% of filler    | 137.9        | 28.8  | -    | -                                       | ZIF-8                   | Pebax 2533                 | Ni <sup>2+</sup>                           | 10 wt%   | 0 | CO <sub>2</sub> /N <sub>2</sub> (20/80)                             | 25 °C, 0.2 MPa | 266         | -     | 33.8  | -                                       | <i>In-situ</i> synthesize Ni-Zn-ZIF-8 | Increasing CO <sub>2</sub> solubility                                                                                       | 2018 <sup>85</sup> | 10 wt%   | Ni/Zn=1/12            | 321          | -     | 42.8 | -                                       | SAPO-34                 | PES                        | 2-Hydroxy 5-Methyl Aniline                 | 20 wt%   | 0 | H <sub>2</sub> , CO <sub>2</sub> , CH <sub>4</sub>                  | 35 °C, 0.3 MPa | 5.77        | 37.0  | -     | 2.24 (H <sub>2</sub> /CO <sub>2</sub> ) | Direct physical blending              | 1. Eliminating interfacial voids;<br>2. Stiffening polymer matrix                                                           | 2012 <sup>86</sup> | 20 wt%   | 10 wt%                | 1.34         | 44.7  | -    | 3.96 (H <sub>2</sub> /CO <sub>2</sub> ) | ZSM-5                   | 6FDA-Durene                | Liquid Sulfolane                           | 15 wt%   | 0 | CO <sub>2</sub> , CH <sub>4</sub> , N <sub>2</sub> , H <sub>2</sub> | 35 °C, 0.2 MPa | 1492        | 7.3   | 9.1   | 1.3                                     | Direct physical blending        | Eliminating interfacial voids                                                                                               | 2013 <sup>87</sup> | 15 wt%   | 31 wt%                | 101          | 18.0  | 27.2 | 2.1                                     | GO                      | Ultem <sup>®</sup> 1000    | Ethylenediamine                            | 0.75 wt% | 0 | CO <sub>2</sub> , CH <sub>4</sub>                                   | 25 °C, 1.0 MPa | 1.926       | 58.4  | -     | -                                      | Filler surface modification     | 1. Eliminating interfacial voids;<br>2. Increasing CO <sub>2</sub> solubility;<br>3. Facilitating CO <sub>2</sub> transport | 2014 <sup>92</sup> | 0.75 wt% | NA                    | 1.570        | 142.7 | -    | -                                      | CMS                     | PES                        | Diethanolamine                             | 30 wt%   | 0 | CO <sub>2</sub> , CH <sub>4</sub>                                   | 25 °C, 1.0 MPa | 44.69 (GPU) | 11.1  | -     | -                                      | Direct physical blending        | 1. Increasing CO <sub>2</sub> solubility<br>2. Facilitating CO <sub>2</sub> transport                                       | 2015 <sup>88</sup> | 30 wt%   | 15 wt%                | 106.65 (GPU) | 51.39 | -   | -                                      | ZIF-90                  | Matrimid <sup>®</sup> 5218 | Ethylenediamine                            | 21 wt% | 0 | H <sub>2</sub> /CO <sub>2</sub> (50/50)                             | 25 °C, 0.2 MPa | 6           | -     | -     | 5.0 (H <sub>2</sub> /CO <sub>2</sub> ) | Blending and covalently bonding | 1. Reducing effective pore size;<br>2. Stiffening polymer matrix                        | 2015 <sup>89</sup> | 21 wt% | 0.05625 wt% of filler | 2            | -     | -   | 9.5 (H <sub>2</sub> /CO <sub>2</sub> ) | UiO-66-NH <sub>2</sub>  | Matrimid <sup>®</sup> 5218 | Phenyl acetyl                              | 23 wt% | 0 | CO <sub>2</sub> , N <sub>2</sub>                                    | RT, 0.24 MPa   | ~24   | -     | ~36.3 | -                                      | Filler surface modification     | Eliminating interfacial voids                                                           | 2015 <sup>93</sup> | 23 wt% | 2-6% of filler        | ~29   | -     | ~37 | -                                      | MWCNTs -NH <sub>2</sub> | Pebax 1657                 | Glycerol triacetate                        | 1 wt%  | 0 | H <sub>2</sub> , CO <sub>2</sub> , CH <sub>4</sub> , N <sub>2</sub> | 35 °C, 0.7 MPa | 202   | ~16.5 | ~51.8 | ~10 | Direct physical blending    | 1. Improve filler distribution;<br>2. Increasing fractional free volume                 | 2017 <sup>90</sup> | 1 wt%  | 25 wt%         | 1408  | ~14   | ~39 | ~13 | Zeolite Y               | Matrimid <sup>®</sup> 5218 | Co <sup>2+</sup> -diamine-diketone complex | 15 wt% | 0 | CO <sub>2</sub> , CH <sub>4</sub>                                   | 35 °C, 0.2 MPa | 17.52 | 43.3  | -     | -   | Encapsulation            | 1. Reducing effective pore size;<br>2. Increasing CO <sub>2</sub> diffusion selectivity | 2018 <sup>91</sup> | 15 wt% | NA     | 18.96 | 111.7 | -   | -   |           |                            |                                            |        |   |                                   |                |       |      |   |   |               |
| PVI@CNT                 | Matrimid <sup>®</sup> 5218 | Zn <sup>2+</sup>                           | 7 wt%             | 0                              | CO <sub>2</sub> /CH <sub>4</sub> (30/70)                            | 30 °C, 0.2 MPa       | ~5.5                                  | ~41.5                                        | -                                           | -                                           | Ion chelating                         | Facilitating CO <sub>2</sub> transport                                                                                      | 2016 <sup>82</sup>      |                         |                            |                                            |          |   |                                                                     |                |             |       |       |                                         |                                       |                                                                                                                             |                    |          |                       |              |       |      |                                         |                         |                            |                                            |          |   |                                                                     |                |             |       |       |                                         |                                       |                                                                                                                             |                    |          |                       |              |       |      |                                         |                         |                            |                                            |          |   |                                                                     |                |             |       |       |                                         |                                       |                                                                                                                             |                    |          |                       |              |       |      |                                         |                         |                            |                                            |          |   |                                                                     |                |             |       |       |                                         |                                       |                                                                                                                             |                    |          |                       |              |       |      |                                         |                         |                            |                                            |          |   |                                                                     |                |             |       |       |                                         |                                       |                                                                                                                             |                    |          |                       |              |       |      |                                         |                         |                            |                                            |          |   |                                                                     |                |             |       |       |                                         |                                 |                                                                                                                             |                    |          |                       |              |       |      |                                         |                         |                            |                                            |          |   |                                                                     |                |             |       |       |                                        |                                 |                                                                                                                             |                    |          |                       |              |       |      |                                        |                         |                            |                                            |          |   |                                                                     |                |             |       |       |                                        |                                 |                                                                                                                             |                    |          |                       |              |       |     |                                        |                         |                            |                                            |        |   |                                                                     |                |             |       |       |                                        |                                 |                                                                                         |                    |        |                       |              |       |     |                                        |                         |                            |                                            |        |   |                                                                     |                |       |       |       |                                        |                                 |                                                                                         |                    |        |                       |       |       |     |                                        |                         |                            |                                            |        |   |                                                                     |                |       |       |       |     |                             |                                                                                         |                    |        |                |       |       |     |     |                         |                            |                                            |        |   |                                                                     |                |       |       |       |     |                          |                                                                                         |                    |        |        |       |       |     |     |           |                            |                                            |        |   |                                   |                |       |      |   |   |               |
|                         |                            |                                            | 7 wt%             | NA                             |                                                                     |                      | ~11.6                                 | ~70                                          | -                                           | -                                           |                                       |                                                                                                                             |                         | PVI@CNT                 | Matrimid <sup>®</sup> 5218 | Cu <sup>2+</sup>                           | 7 wt%    | 0 | CO <sub>2</sub> /CH <sub>4</sub> (30/70)                            | 30 °C, 0.2 MPa | ~5.5        | ~41.5 | -     | -                                       | Ion chelating                         | Facilitating CO <sub>2</sub> transport                                                                                      | 2016 <sup>83</sup> | 7 wt%    | NA                    | ~10.4        | ~46.8 | -    | -                                       | PDA-GO                  | Pebax 1657                 | Zn <sup>2+</sup>                           | 1 wt%    | 0 | CO <sub>2</sub> /CH <sub>4</sub> (30/70)                            | 30 °C, 0.2 MPa | ~93         | ~23   | -     | -                                       | Ion chelating                         | Facilitating CO <sub>2</sub> transport                                                                                      | 2017 <sup>84</sup> | 1 wt%    | 34.2 wt% of filler    | 137.9        | 28.8  | -    | -                                       | ZIF-8                   | Pebax 2533                 | Ni <sup>2+</sup>                           | 10 wt%   | 0 | CO <sub>2</sub> /N <sub>2</sub> (20/80)                             | 25 °C, 0.2 MPa | 266         | -     | 33.8  | -                                       | <i>In-situ</i> synthesize Ni-Zn-ZIF-8 | Increasing CO <sub>2</sub> solubility                                                                                       | 2018 <sup>85</sup> | 10 wt%   | Ni/Zn=1/12            | 321          | -     | 42.8 | -                                       | SAPO-34                 | PES                        | 2-Hydroxy 5-Methyl Aniline                 | 20 wt%   | 0 | H <sub>2</sub> , CO <sub>2</sub> , CH <sub>4</sub>                  | 35 °C, 0.3 MPa | 5.77        | 37.0  | -     | 2.24 (H <sub>2</sub> /CO <sub>2</sub> ) | Direct physical blending              | 1. Eliminating interfacial voids;<br>2. Stiffening polymer matrix                                                           | 2012 <sup>86</sup> | 20 wt%   | 10 wt%                | 1.34         | 44.7  | -    | 3.96 (H <sub>2</sub> /CO <sub>2</sub> ) | ZSM-5                   | 6FDA-Durene                | Liquid Sulfolane                           | 15 wt%   | 0 | CO <sub>2</sub> , CH <sub>4</sub> , N <sub>2</sub> , H <sub>2</sub> | 35 °C, 0.2 MPa | 1492        | 7.3   | 9.1   | 1.3                                     | Direct physical blending              | Eliminating interfacial voids                                                                                               | 2013 <sup>87</sup> | 15 wt%   | 31 wt%                | 101          | 18.0  | 27.2 | 2.1                                     | GO                      | Ultem <sup>®</sup> 1000    | Ethylenediamine                            | 0.75 wt% | 0 | CO <sub>2</sub> , CH <sub>4</sub>                                   | 25 °C, 1.0 MPa | 1.926       | 58.4  | -     | -                                       | Filler surface modification     | 1. Eliminating interfacial voids;<br>2. Increasing CO <sub>2</sub> solubility;<br>3. Facilitating CO <sub>2</sub> transport | 2014 <sup>92</sup> | 0.75 wt% | NA                    | 1.570        | 142.7 | -    | -                                       | CMS                     | PES                        | Diethanolamine                             | 30 wt%   | 0 | CO <sub>2</sub> , CH <sub>4</sub>                                   | 25 °C, 1.0 MPa | 44.69 (GPU) | 11.1  | -     | -                                      | Direct physical blending        | 1. Increasing CO <sub>2</sub> solubility<br>2. Facilitating CO <sub>2</sub> transport                                       | 2015 <sup>88</sup> | 30 wt%   | 15 wt%                | 106.65 (GPU) | 51.39 | -    | -                                      | ZIF-90                  | Matrimid <sup>®</sup> 5218 | Ethylenediamine                            | 21 wt%   | 0 | H <sub>2</sub> /CO <sub>2</sub> (50/50)                             | 25 °C, 0.2 MPa | 6           | -     | -     | 5.0 (H <sub>2</sub> /CO <sub>2</sub> ) | Blending and covalently bonding | 1. Reducing effective pore size;<br>2. Stiffening polymer matrix                                                            | 2015 <sup>89</sup> | 21 wt%   | 0.05625 wt% of filler | 2            | -     | -   | 9.5 (H <sub>2</sub> /CO <sub>2</sub> ) | UiO-66-NH <sub>2</sub>  | Matrimid <sup>®</sup> 5218 | Phenyl acetyl                              | 23 wt% | 0 | CO <sub>2</sub> , N <sub>2</sub>                                    | RT, 0.24 MPa   | ~24         | -     | ~36.3 | -                                      | Filler surface modification     | Eliminating interfacial voids                                                           | 2015 <sup>93</sup> | 23 wt% | 2-6% of filler        | ~29          | -     | ~37 | -                                      | MWCNTs -NH <sub>2</sub> | Pebax 1657                 | Glycerol triacetate                        | 1 wt%  | 0 | H <sub>2</sub> , CO <sub>2</sub> , CH <sub>4</sub> , N <sub>2</sub> | 35 °C, 0.7 MPa | 202   | ~16.5 | ~51.8 | ~10                                    | Direct physical blending        | 1. Improve filler distribution;<br>2. Increasing fractional free volume                 | 2017 <sup>90</sup> | 1 wt%  | 25 wt%                | 1408  | ~14   | ~39 | ~13                                    | Zeolite Y               | Matrimid <sup>®</sup> 5218 | Co <sup>2+</sup> -diamine-diketone complex | 15 wt% | 0 | CO <sub>2</sub> , CH <sub>4</sub>                                   | 35 °C, 0.2 MPa | 17.52 | 43.3  | -     | -   | Encapsulation               | 1. Reducing effective pore size;<br>2. Increasing CO <sub>2</sub> diffusion selectivity | 2018 <sup>91</sup> | 15 wt% | NA             | 18.96 | 111.7 | -   | -   |                         |                            |                                            |        |   |                                                                     |                |       |       |       |     |                          |                                                                                         |                    |        |        |       |       |     |     |           |                            |                                            |        |   |                                   |                |       |      |   |   |               |
| PVI@CNT                 | Matrimid <sup>®</sup> 5218 | Cu <sup>2+</sup>                           | 7 wt%             | 0                              | CO <sub>2</sub> /CH <sub>4</sub> (30/70)                            | 30 °C, 0.2 MPa       | ~5.5                                  | ~41.5                                        | -                                           | -                                           | Ion chelating                         | Facilitating CO <sub>2</sub> transport                                                                                      | 2016 <sup>83</sup>      |                         |                            |                                            |          |   |                                                                     |                |             |       |       |                                         |                                       |                                                                                                                             |                    |          |                       |              |       |      |                                         |                         |                            |                                            |          |   |                                                                     |                |             |       |       |                                         |                                       |                                                                                                                             |                    |          |                       |              |       |      |                                         |                         |                            |                                            |          |   |                                                                     |                |             |       |       |                                         |                                       |                                                                                                                             |                    |          |                       |              |       |      |                                         |                         |                            |                                            |          |   |                                                                     |                |             |       |       |                                         |                                       |                                                                                                                             |                    |          |                       |              |       |      |                                         |                         |                            |                                            |          |   |                                                                     |                |             |       |       |                                         |                                       |                                                                                                                             |                    |          |                       |              |       |      |                                         |                         |                            |                                            |          |   |                                                                     |                |             |       |       |                                         |                                 |                                                                                                                             |                    |          |                       |              |       |      |                                         |                         |                            |                                            |          |   |                                                                     |                |             |       |       |                                        |                                 |                                                                                                                             |                    |          |                       |              |       |      |                                        |                         |                            |                                            |          |   |                                                                     |                |             |       |       |                                        |                                 |                                                                                                                             |                    |          |                       |              |       |     |                                        |                         |                            |                                            |        |   |                                                                     |                |             |       |       |                                        |                                 |                                                                                         |                    |        |                       |              |       |     |                                        |                         |                            |                                            |        |   |                                                                     |                |       |       |       |                                        |                                 |                                                                                         |                    |        |                       |       |       |     |                                        |                         |                            |                                            |        |   |                                                                     |                |       |       |       |     |                             |                                                                                         |                    |        |                |       |       |     |     |                         |                            |                                            |        |   |                                                                     |                |       |       |       |     |                          |                                                                                         |                    |        |        |       |       |     |     |           |                            |                                            |        |   |                                   |                |       |      |   |   |               |
|                         |                            |                                            | 7 wt%             | NA                             |                                                                     |                      | ~10.4                                 | ~46.8                                        | -                                           | -                                           |                                       |                                                                                                                             |                         | PDA-GO                  | Pebax 1657                 | Zn <sup>2+</sup>                           | 1 wt%    | 0 | CO <sub>2</sub> /CH <sub>4</sub> (30/70)                            | 30 °C, 0.2 MPa | ~93         | ~23   | -     | -                                       | Ion chelating                         | Facilitating CO <sub>2</sub> transport                                                                                      | 2017 <sup>84</sup> | 1 wt%    | 34.2 wt% of filler    | 137.9        | 28.8  | -    | -                                       | ZIF-8                   | Pebax 2533                 | Ni <sup>2+</sup>                           | 10 wt%   | 0 | CO <sub>2</sub> /N <sub>2</sub> (20/80)                             | 25 °C, 0.2 MPa | 266         | -     | 33.8  | -                                       | <i>In-situ</i> synthesize Ni-Zn-ZIF-8 | Increasing CO <sub>2</sub> solubility                                                                                       | 2018 <sup>85</sup> | 10 wt%   | Ni/Zn=1/12            | 321          | -     | 42.8 | -                                       | SAPO-34                 | PES                        | 2-Hydroxy 5-Methyl Aniline                 | 20 wt%   | 0 | H <sub>2</sub> , CO <sub>2</sub> , CH <sub>4</sub>                  | 35 °C, 0.3 MPa | 5.77        | 37.0  | -     | 2.24 (H <sub>2</sub> /CO <sub>2</sub> ) | Direct physical blending              | 1. Eliminating interfacial voids;<br>2. Stiffening polymer matrix                                                           | 2012 <sup>86</sup> | 20 wt%   | 10 wt%                | 1.34         | 44.7  | -    | 3.96 (H <sub>2</sub> /CO <sub>2</sub> ) | ZSM-5                   | 6FDA-Durene                | Liquid Sulfolane                           | 15 wt%   | 0 | CO <sub>2</sub> , CH <sub>4</sub> , N <sub>2</sub> , H <sub>2</sub> | 35 °C, 0.2 MPa | 1492        | 7.3   | 9.1   | 1.3                                     | Direct physical blending              | Eliminating interfacial voids                                                                                               | 2013 <sup>87</sup> | 15 wt%   | 31 wt%                | 101          | 18.0  | 27.2 | 2.1                                     | GO                      | Ultem <sup>®</sup> 1000    | Ethylenediamine                            | 0.75 wt% | 0 | CO <sub>2</sub> , CH <sub>4</sub>                                   | 25 °C, 1.0 MPa | 1.926       | 58.4  | -     | -                                       | Filler surface modification           | 1. Eliminating interfacial voids;<br>2. Increasing CO <sub>2</sub> solubility;<br>3. Facilitating CO <sub>2</sub> transport | 2014 <sup>92</sup> | 0.75 wt% | NA                    | 1.570        | 142.7 | -    | -                                       | CMS                     | PES                        | Diethanolamine                             | 30 wt%   | 0 | CO <sub>2</sub> , CH <sub>4</sub>                                   | 25 °C, 1.0 MPa | 44.69 (GPU) | 11.1  | -     | -                                       | Direct physical blending        | 1. Increasing CO <sub>2</sub> solubility<br>2. Facilitating CO <sub>2</sub> transport                                       | 2015 <sup>88</sup> | 30 wt%   | 15 wt%                | 106.65 (GPU) | 51.39 | -    | -                                       | ZIF-90                  | Matrimid <sup>®</sup> 5218 | Ethylenediamine                            | 21 wt%   | 0 | H <sub>2</sub> /CO <sub>2</sub> (50/50)                             | 25 °C, 0.2 MPa | 6           | -     | -     | 5.0 (H <sub>2</sub> /CO <sub>2</sub> ) | Blending and covalently bonding | 1. Reducing effective pore size;<br>2. Stiffening polymer matrix                                                            | 2015 <sup>89</sup> | 21 wt%   | 0.05625 wt% of filler | 2            | -     | -    | 9.5 (H <sub>2</sub> /CO <sub>2</sub> ) | UiO-66-NH <sub>2</sub>  | Matrimid <sup>®</sup> 5218 | Phenyl acetyl                              | 23 wt%   | 0 | CO <sub>2</sub> , N <sub>2</sub>                                    | RT, 0.24 MPa   | ~24         | -     | ~36.3 | -                                      | Filler surface modification     | Eliminating interfacial voids                                                                                               | 2015 <sup>93</sup> | 23 wt%   | 2-6% of filler        | ~29          | -     | ~37 | -                                      | MWCNTs -NH <sub>2</sub> | Pebax 1657                 | Glycerol triacetate                        | 1 wt%  | 0 | H <sub>2</sub> , CO <sub>2</sub> , CH <sub>4</sub> , N <sub>2</sub> | 35 °C, 0.7 MPa | 202         | ~16.5 | ~51.8 | ~10                                    | Direct physical blending        | 1. Improve filler distribution;<br>2. Increasing fractional free volume                 | 2017 <sup>90</sup> | 1 wt%  | 25 wt%                | 1408         | ~14   | ~39 | ~13                                    | Zeolite Y               | Matrimid <sup>®</sup> 5218 | Co <sup>2+</sup> -diamine-diketone complex | 15 wt% | 0 | CO <sub>2</sub> , CH <sub>4</sub>                                   | 35 °C, 0.2 MPa | 17.52 | 43.3  | -     | -                                      | Encapsulation                   | 1. Reducing effective pore size;<br>2. Increasing CO <sub>2</sub> diffusion selectivity | 2018 <sup>91</sup> | 15 wt% | NA                    | 18.96 | 111.7 | -   | -                                      |                         |                            |                                            |        |   |                                                                     |                |       |       |       |     |                             |                                                                                         |                    |        |                |       |       |     |     |                         |                            |                                            |        |   |                                                                     |                |       |       |       |     |                          |                                                                                         |                    |        |        |       |       |     |     |           |                            |                                            |        |   |                                   |                |       |      |   |   |               |
| PDA-GO                  | Pebax 1657                 | Zn <sup>2+</sup>                           | 1 wt%             | 0                              | CO <sub>2</sub> /CH <sub>4</sub> (30/70)                            | 30 °C, 0.2 MPa       | ~93                                   | ~23                                          | -                                           | -                                           | Ion chelating                         | Facilitating CO <sub>2</sub> transport                                                                                      | 2017 <sup>84</sup>      |                         |                            |                                            |          |   |                                                                     |                |             |       |       |                                         |                                       |                                                                                                                             |                    |          |                       |              |       |      |                                         |                         |                            |                                            |          |   |                                                                     |                |             |       |       |                                         |                                       |                                                                                                                             |                    |          |                       |              |       |      |                                         |                         |                            |                                            |          |   |                                                                     |                |             |       |       |                                         |                                       |                                                                                                                             |                    |          |                       |              |       |      |                                         |                         |                            |                                            |          |   |                                                                     |                |             |       |       |                                         |                                       |                                                                                                                             |                    |          |                       |              |       |      |                                         |                         |                            |                                            |          |   |                                                                     |                |             |       |       |                                         |                                       |                                                                                                                             |                    |          |                       |              |       |      |                                         |                         |                            |                                            |          |   |                                                                     |                |             |       |       |                                         |                                 |                                                                                                                             |                    |          |                       |              |       |      |                                         |                         |                            |                                            |          |   |                                                                     |                |             |       |       |                                        |                                 |                                                                                                                             |                    |          |                       |              |       |      |                                        |                         |                            |                                            |          |   |                                                                     |                |             |       |       |                                        |                                 |                                                                                                                             |                    |          |                       |              |       |     |                                        |                         |                            |                                            |        |   |                                                                     |                |             |       |       |                                        |                                 |                                                                                         |                    |        |                       |              |       |     |                                        |                         |                            |                                            |        |   |                                                                     |                |       |       |       |                                        |                                 |                                                                                         |                    |        |                       |       |       |     |                                        |                         |                            |                                            |        |   |                                                                     |                |       |       |       |     |                             |                                                                                         |                    |        |                |       |       |     |     |                         |                            |                                            |        |   |                                                                     |                |       |       |       |     |                          |                                                                                         |                    |        |        |       |       |     |     |           |                            |                                            |        |   |                                   |                |       |      |   |   |               |
|                         |                            |                                            | 1 wt%             | 34.2 wt% of filler             |                                                                     |                      | 137.9                                 | 28.8                                         | -                                           | -                                           |                                       |                                                                                                                             |                         | ZIF-8                   | Pebax 2533                 | Ni <sup>2+</sup>                           | 10 wt%   | 0 | CO <sub>2</sub> /N <sub>2</sub> (20/80)                             | 25 °C, 0.2 MPa | 266         | -     | 33.8  | -                                       | <i>In-situ</i> synthesize Ni-Zn-ZIF-8 | Increasing CO <sub>2</sub> solubility                                                                                       | 2018 <sup>85</sup> | 10 wt%   | Ni/Zn=1/12            | 321          | -     | 42.8 | -                                       | SAPO-34                 | PES                        | 2-Hydroxy 5-Methyl Aniline                 | 20 wt%   | 0 | H <sub>2</sub> , CO <sub>2</sub> , CH <sub>4</sub>                  | 35 °C, 0.3 MPa | 5.77        | 37.0  | -     | 2.24 (H <sub>2</sub> /CO <sub>2</sub> ) | Direct physical blending              | 1. Eliminating interfacial voids;<br>2. Stiffening polymer matrix                                                           | 2012 <sup>86</sup> | 20 wt%   | 10 wt%                | 1.34         | 44.7  | -    | 3.96 (H <sub>2</sub> /CO <sub>2</sub> ) | ZSM-5                   | 6FDA-Durene                | Liquid Sulfolane                           | 15 wt%   | 0 | CO <sub>2</sub> , CH <sub>4</sub> , N <sub>2</sub> , H <sub>2</sub> | 35 °C, 0.2 MPa | 1492        | 7.3   | 9.1   | 1.3                                     | Direct physical blending              | Eliminating interfacial voids                                                                                               | 2013 <sup>87</sup> | 15 wt%   | 31 wt%                | 101          | 18.0  | 27.2 | 2.1                                     | GO                      | Ultem <sup>®</sup> 1000    | Ethylenediamine                            | 0.75 wt% | 0 | CO <sub>2</sub> , CH <sub>4</sub>                                   | 25 °C, 1.0 MPa | 1.926       | 58.4  | -     | -                                       | Filler surface modification           | 1. Eliminating interfacial voids;<br>2. Increasing CO <sub>2</sub> solubility;<br>3. Facilitating CO <sub>2</sub> transport | 2014 <sup>92</sup> | 0.75 wt% | NA                    | 1.570        | 142.7 | -    | -                                       | CMS                     | PES                        | Diethanolamine                             | 30 wt%   | 0 | CO <sub>2</sub> , CH <sub>4</sub>                                   | 25 °C, 1.0 MPa | 44.69 (GPU) | 11.1  | -     | -                                       | Direct physical blending              | 1. Increasing CO <sub>2</sub> solubility<br>2. Facilitating CO <sub>2</sub> transport                                       | 2015 <sup>88</sup> | 30 wt%   | 15 wt%                | 106.65 (GPU) | 51.39 | -    | -                                       | ZIF-90                  | Matrimid <sup>®</sup> 5218 | Ethylenediamine                            | 21 wt%   | 0 | H <sub>2</sub> /CO <sub>2</sub> (50/50)                             | 25 °C, 0.2 MPa | 6           | -     | -     | 5.0 (H <sub>2</sub> /CO <sub>2</sub> )  | Blending and covalently bonding | 1. Reducing effective pore size;<br>2. Stiffening polymer matrix                                                            | 2015 <sup>89</sup> | 21 wt%   | 0.05625 wt% of filler | 2            | -     | -    | 9.5 (H <sub>2</sub> /CO <sub>2</sub> )  | UiO-66-NH <sub>2</sub>  | Matrimid <sup>®</sup> 5218 | Phenyl acetyl                              | 23 wt%   | 0 | CO <sub>2</sub> , N <sub>2</sub>                                    | RT, 0.24 MPa   | ~24         | -     | ~36.3 | -                                      | Filler surface modification     | Eliminating interfacial voids                                                                                               | 2015 <sup>93</sup> | 23 wt%   | 2-6% of filler        | ~29          | -     | ~37  | -                                      | MWCNTs -NH <sub>2</sub> | Pebax 1657                 | Glycerol triacetate                        | 1 wt%    | 0 | H <sub>2</sub> , CO <sub>2</sub> , CH <sub>4</sub> , N <sub>2</sub> | 35 °C, 0.7 MPa | 202         | ~16.5 | ~51.8 | ~10                                    | Direct physical blending        | 1. Improve filler distribution;<br>2. Increasing fractional free volume                                                     | 2017 <sup>90</sup> | 1 wt%    | 25 wt%                | 1408         | ~14   | ~39 | ~13                                    | Zeolite Y               | Matrimid <sup>®</sup> 5218 | Co <sup>2+</sup> -diamine-diketone complex | 15 wt% | 0 | CO <sub>2</sub> , CH <sub>4</sub>                                   | 35 °C, 0.2 MPa | 17.52       | 43.3  | -     | -                                      | Encapsulation                   | 1. Reducing effective pore size;<br>2. Increasing CO <sub>2</sub> diffusion selectivity | 2018 <sup>91</sup> | 15 wt% | NA                    | 18.96        | 111.7 | -   | -                                      |                         |                            |                                            |        |   |                                                                     |                |       |       |       |                                        |                                 |                                                                                         |                    |        |                       |       |       |     |                                        |                         |                            |                                            |        |   |                                                                     |                |       |       |       |     |                             |                                                                                         |                    |        |                |       |       |     |     |                         |                            |                                            |        |   |                                                                     |                |       |       |       |     |                          |                                                                                         |                    |        |        |       |       |     |     |           |                            |                                            |        |   |                                   |                |       |      |   |   |               |
| ZIF-8                   | Pebax 2533                 | Ni <sup>2+</sup>                           | 10 wt%            | 0                              | CO <sub>2</sub> /N <sub>2</sub> (20/80)                             | 25 °C, 0.2 MPa       | 266                                   | -                                            | 33.8                                        | -                                           | <i>In-situ</i> synthesize Ni-Zn-ZIF-8 | Increasing CO <sub>2</sub> solubility                                                                                       | 2018 <sup>85</sup>      |                         |                            |                                            |          |   |                                                                     |                |             |       |       |                                         |                                       |                                                                                                                             |                    |          |                       |              |       |      |                                         |                         |                            |                                            |          |   |                                                                     |                |             |       |       |                                         |                                       |                                                                                                                             |                    |          |                       |              |       |      |                                         |                         |                            |                                            |          |   |                                                                     |                |             |       |       |                                         |                                       |                                                                                                                             |                    |          |                       |              |       |      |                                         |                         |                            |                                            |          |   |                                                                     |                |             |       |       |                                         |                                       |                                                                                                                             |                    |          |                       |              |       |      |                                         |                         |                            |                                            |          |   |                                                                     |                |             |       |       |                                         |                                       |                                                                                                                             |                    |          |                       |              |       |      |                                         |                         |                            |                                            |          |   |                                                                     |                |             |       |       |                                         |                                 |                                                                                                                             |                    |          |                       |              |       |      |                                         |                         |                            |                                            |          |   |                                                                     |                |             |       |       |                                        |                                 |                                                                                                                             |                    |          |                       |              |       |      |                                        |                         |                            |                                            |          |   |                                                                     |                |             |       |       |                                        |                                 |                                                                                                                             |                    |          |                       |              |       |     |                                        |                         |                            |                                            |        |   |                                                                     |                |             |       |       |                                        |                                 |                                                                                         |                    |        |                       |              |       |     |                                        |                         |                            |                                            |        |   |                                                                     |                |       |       |       |                                        |                                 |                                                                                         |                    |        |                       |       |       |     |                                        |                         |                            |                                            |        |   |                                                                     |                |       |       |       |     |                             |                                                                                         |                    |        |                |       |       |     |     |                         |                            |                                            |        |   |                                                                     |                |       |       |       |     |                          |                                                                                         |                    |        |        |       |       |     |     |           |                            |                                            |        |   |                                   |                |       |      |   |   |               |
|                         |                            |                                            | 10 wt%            | Ni/Zn=1/12                     |                                                                     |                      | 321                                   | -                                            | 42.8                                        | -                                           |                                       |                                                                                                                             |                         | SAPO-34                 | PES                        | 2-Hydroxy 5-Methyl Aniline                 | 20 wt%   | 0 | H <sub>2</sub> , CO <sub>2</sub> , CH <sub>4</sub>                  | 35 °C, 0.3 MPa | 5.77        | 37.0  | -     | 2.24 (H <sub>2</sub> /CO <sub>2</sub> ) | Direct physical blending              | 1. Eliminating interfacial voids;<br>2. Stiffening polymer matrix                                                           | 2012 <sup>86</sup> | 20 wt%   | 10 wt%                | 1.34         | 44.7  | -    | 3.96 (H <sub>2</sub> /CO <sub>2</sub> ) | ZSM-5                   | 6FDA-Durene                | Liquid Sulfolane                           | 15 wt%   | 0 | CO <sub>2</sub> , CH <sub>4</sub> , N <sub>2</sub> , H <sub>2</sub> | 35 °C, 0.2 MPa | 1492        | 7.3   | 9.1   | 1.3                                     | Direct physical blending              | Eliminating interfacial voids                                                                                               | 2013 <sup>87</sup> | 15 wt%   | 31 wt%                | 101          | 18.0  | 27.2 | 2.1                                     | GO                      | Ultem <sup>®</sup> 1000    | Ethylenediamine                            | 0.75 wt% | 0 | CO <sub>2</sub> , CH <sub>4</sub>                                   | 25 °C, 1.0 MPa | 1.926       | 58.4  | -     | -                                       | Filler surface modification           | 1. Eliminating interfacial voids;<br>2. Increasing CO <sub>2</sub> solubility;<br>3. Facilitating CO <sub>2</sub> transport | 2014 <sup>92</sup> | 0.75 wt% | NA                    | 1.570        | 142.7 | -    | -                                       | CMS                     | PES                        | Diethanolamine                             | 30 wt%   | 0 | CO <sub>2</sub> , CH <sub>4</sub>                                   | 25 °C, 1.0 MPa | 44.69 (GPU) | 11.1  | -     | -                                       | Direct physical blending              | 1. Increasing CO <sub>2</sub> solubility<br>2. Facilitating CO <sub>2</sub> transport                                       | 2015 <sup>88</sup> | 30 wt%   | 15 wt%                | 106.65 (GPU) | 51.39 | -    | -                                       | ZIF-90                  | Matrimid <sup>®</sup> 5218 | Ethylenediamine                            | 21 wt%   | 0 | H <sub>2</sub> /CO <sub>2</sub> (50/50)                             | 25 °C, 0.2 MPa | 6           | -     | -     | 5.0 (H <sub>2</sub> /CO <sub>2</sub> )  | Blending and covalently bonding       | 1. Reducing effective pore size;<br>2. Stiffening polymer matrix                                                            | 2015 <sup>89</sup> | 21 wt%   | 0.05625 wt% of filler | 2            | -     | -    | 9.5 (H <sub>2</sub> /CO <sub>2</sub> )  | UiO-66-NH <sub>2</sub>  | Matrimid <sup>®</sup> 5218 | Phenyl acetyl                              | 23 wt%   | 0 | CO <sub>2</sub> , N <sub>2</sub>                                    | RT, 0.24 MPa   | ~24         | -     | ~36.3 | -                                       | Filler surface modification     | Eliminating interfacial voids                                                                                               | 2015 <sup>93</sup> | 23 wt%   | 2-6% of filler        | ~29          | -     | ~37  | -                                       | MWCNTs -NH <sub>2</sub> | Pebax 1657                 | Glycerol triacetate                        | 1 wt%    | 0 | H <sub>2</sub> , CO <sub>2</sub> , CH <sub>4</sub> , N <sub>2</sub> | 35 °C, 0.7 MPa | 202         | ~16.5 | ~51.8 | ~10                                    | Direct physical blending        | 1. Improve filler distribution;<br>2. Increasing fractional free volume                                                     | 2017 <sup>90</sup> | 1 wt%    | 25 wt%                | 1408         | ~14   | ~39  | ~13                                    | Zeolite Y               | Matrimid <sup>®</sup> 5218 | Co <sup>2+</sup> -diamine-diketone complex | 15 wt%   | 0 | CO <sub>2</sub> , CH <sub>4</sub>                                   | 35 °C, 0.2 MPa | 17.52       | 43.3  | -     | -                                      | Encapsulation                   | 1. Reducing effective pore size;<br>2. Increasing CO <sub>2</sub> diffusion selectivity                                     | 2018 <sup>91</sup> | 15 wt%   | NA                    | 18.96        | 111.7 | -   | -                                      |                         |                            |                                            |        |   |                                                                     |                |             |       |       |                                        |                                 |                                                                                         |                    |        |                       |              |       |     |                                        |                         |                            |                                            |        |   |                                                                     |                |       |       |       |                                        |                                 |                                                                                         |                    |        |                       |       |       |     |                                        |                         |                            |                                            |        |   |                                                                     |                |       |       |       |     |                             |                                                                                         |                    |        |                |       |       |     |     |                         |                            |                                            |        |   |                                                                     |                |       |       |       |     |                          |                                                                                         |                    |        |        |       |       |     |     |           |                            |                                            |        |   |                                   |                |       |      |   |   |               |
| SAPO-34                 | PES                        | 2-Hydroxy 5-Methyl Aniline                 | 20 wt%            | 0                              | H <sub>2</sub> , CO <sub>2</sub> , CH <sub>4</sub>                  | 35 °C, 0.3 MPa       | 5.77                                  | 37.0                                         | -                                           | 2.24 (H <sub>2</sub> /CO <sub>2</sub> )     | Direct physical blending              | 1. Eliminating interfacial voids;<br>2. Stiffening polymer matrix                                                           | 2012 <sup>86</sup>      |                         |                            |                                            |          |   |                                                                     |                |             |       |       |                                         |                                       |                                                                                                                             |                    |          |                       |              |       |      |                                         |                         |                            |                                            |          |   |                                                                     |                |             |       |       |                                         |                                       |                                                                                                                             |                    |          |                       |              |       |      |                                         |                         |                            |                                            |          |   |                                                                     |                |             |       |       |                                         |                                       |                                                                                                                             |                    |          |                       |              |       |      |                                         |                         |                            |                                            |          |   |                                                                     |                |             |       |       |                                         |                                       |                                                                                                                             |                    |          |                       |              |       |      |                                         |                         |                            |                                            |          |   |                                                                     |                |             |       |       |                                         |                                       |                                                                                                                             |                    |          |                       |              |       |      |                                         |                         |                            |                                            |          |   |                                                                     |                |             |       |       |                                         |                                 |                                                                                                                             |                    |          |                       |              |       |      |                                         |                         |                            |                                            |          |   |                                                                     |                |             |       |       |                                        |                                 |                                                                                                                             |                    |          |                       |              |       |      |                                        |                         |                            |                                            |          |   |                                                                     |                |             |       |       |                                        |                                 |                                                                                                                             |                    |          |                       |              |       |     |                                        |                         |                            |                                            |        |   |                                                                     |                |             |       |       |                                        |                                 |                                                                                         |                    |        |                       |              |       |     |                                        |                         |                            |                                            |        |   |                                                                     |                |       |       |       |                                        |                                 |                                                                                         |                    |        |                       |       |       |     |                                        |                         |                            |                                            |        |   |                                                                     |                |       |       |       |     |                             |                                                                                         |                    |        |                |       |       |     |     |                         |                            |                                            |        |   |                                                                     |                |       |       |       |     |                          |                                                                                         |                    |        |        |       |       |     |     |           |                            |                                            |        |   |                                   |                |       |      |   |   |               |
|                         |                            |                                            | 20 wt%            | 10 wt%                         |                                                                     |                      | 1.34                                  | 44.7                                         | -                                           | 3.96 (H <sub>2</sub> /CO <sub>2</sub> )     |                                       |                                                                                                                             |                         | ZSM-5                   | 6FDA-Durene                | Liquid Sulfolane                           | 15 wt%   | 0 | CO <sub>2</sub> , CH <sub>4</sub> , N <sub>2</sub> , H <sub>2</sub> | 35 °C, 0.2 MPa | 1492        | 7.3   | 9.1   | 1.3                                     | Direct physical blending              | Eliminating interfacial voids                                                                                               | 2013 <sup>87</sup> | 15 wt%   | 31 wt%                | 101          | 18.0  | 27.2 | 2.1                                     | GO                      | Ultem <sup>®</sup> 1000    | Ethylenediamine                            | 0.75 wt% | 0 | CO <sub>2</sub> , CH <sub>4</sub>                                   | 25 °C, 1.0 MPa | 1.926       | 58.4  | -     | -                                       | Filler surface modification           | 1. Eliminating interfacial voids;<br>2. Increasing CO <sub>2</sub> solubility;<br>3. Facilitating CO <sub>2</sub> transport | 2014 <sup>92</sup> | 0.75 wt% | NA                    | 1.570        | 142.7 | -    | -                                       | CMS                     | PES                        | Diethanolamine                             | 30 wt%   | 0 | CO <sub>2</sub> , CH <sub>4</sub>                                   | 25 °C, 1.0 MPa | 44.69 (GPU) | 11.1  | -     | -                                       | Direct physical blending              | 1. Increasing CO <sub>2</sub> solubility<br>2. Facilitating CO <sub>2</sub> transport                                       | 2015 <sup>88</sup> | 30 wt%   | 15 wt%                | 106.65 (GPU) | 51.39 | -    | -                                       | ZIF-90                  | Matrimid <sup>®</sup> 5218 | Ethylenediamine                            | 21 wt%   | 0 | H <sub>2</sub> /CO <sub>2</sub> (50/50)                             | 25 °C, 0.2 MPa | 6           | -     | -     | 5.0 (H <sub>2</sub> /CO <sub>2</sub> )  | Blending and covalently bonding       | 1. Reducing effective pore size;<br>2. Stiffening polymer matrix                                                            | 2015 <sup>89</sup> | 21 wt%   | 0.05625 wt% of filler | 2            | -     | -    | 9.5 (H <sub>2</sub> /CO <sub>2</sub> )  | UiO-66-NH <sub>2</sub>  | Matrimid <sup>®</sup> 5218 | Phenyl acetyl                              | 23 wt%   | 0 | CO <sub>2</sub> , N <sub>2</sub>                                    | RT, 0.24 MPa   | ~24         | -     | ~36.3 | -                                       | Filler surface modification           | Eliminating interfacial voids                                                                                               | 2015 <sup>93</sup> | 23 wt%   | 2-6% of filler        | ~29          | -     | ~37  | -                                       | MWCNTs -NH <sub>2</sub> | Pebax 1657                 | Glycerol triacetate                        | 1 wt%    | 0 | H <sub>2</sub> , CO <sub>2</sub> , CH <sub>4</sub> , N <sub>2</sub> | 35 °C, 0.7 MPa | 202         | ~16.5 | ~51.8 | ~10                                     | Direct physical blending        | 1. Improve filler distribution;<br>2. Increasing fractional free volume                                                     | 2017 <sup>90</sup> | 1 wt%    | 25 wt%                | 1408         | ~14   | ~39  | ~13                                     | Zeolite Y               | Matrimid <sup>®</sup> 5218 | Co <sup>2+</sup> -diamine-diketone complex | 15 wt%   | 0 | CO <sub>2</sub> , CH <sub>4</sub>                                   | 35 °C, 0.2 MPa | 17.52       | 43.3  | -     | -                                      | Encapsulation                   | 1. Reducing effective pore size;<br>2. Increasing CO <sub>2</sub> diffusion selectivity                                     | 2018 <sup>91</sup> | 15 wt%   | NA                    | 18.96        | 111.7 | -    | -                                      |                         |                            |                                            |          |   |                                                                     |                |             |       |       |                                        |                                 |                                                                                                                             |                    |          |                       |              |       |     |                                        |                         |                            |                                            |        |   |                                                                     |                |             |       |       |                                        |                                 |                                                                                         |                    |        |                       |              |       |     |                                        |                         |                            |                                            |        |   |                                                                     |                |       |       |       |                                        |                                 |                                                                                         |                    |        |                       |       |       |     |                                        |                         |                            |                                            |        |   |                                                                     |                |       |       |       |     |                             |                                                                                         |                    |        |                |       |       |     |     |                         |                            |                                            |        |   |                                                                     |                |       |       |       |     |                          |                                                                                         |                    |        |        |       |       |     |     |           |                            |                                            |        |   |                                   |                |       |      |   |   |               |
| ZSM-5                   | 6FDA-Durene                | Liquid Sulfolane                           | 15 wt%            | 0                              | CO <sub>2</sub> , CH <sub>4</sub> , N <sub>2</sub> , H <sub>2</sub> | 35 °C, 0.2 MPa       | 1492                                  | 7.3                                          | 9.1                                         | 1.3                                         | Direct physical blending              | Eliminating interfacial voids                                                                                               | 2013 <sup>87</sup>      |                         |                            |                                            |          |   |                                                                     |                |             |       |       |                                         |                                       |                                                                                                                             |                    |          |                       |              |       |      |                                         |                         |                            |                                            |          |   |                                                                     |                |             |       |       |                                         |                                       |                                                                                                                             |                    |          |                       |              |       |      |                                         |                         |                            |                                            |          |   |                                                                     |                |             |       |       |                                         |                                       |                                                                                                                             |                    |          |                       |              |       |      |                                         |                         |                            |                                            |          |   |                                                                     |                |             |       |       |                                         |                                       |                                                                                                                             |                    |          |                       |              |       |      |                                         |                         |                            |                                            |          |   |                                                                     |                |             |       |       |                                         |                                       |                                                                                                                             |                    |          |                       |              |       |      |                                         |                         |                            |                                            |          |   |                                                                     |                |             |       |       |                                         |                                 |                                                                                                                             |                    |          |                       |              |       |      |                                         |                         |                            |                                            |          |   |                                                                     |                |             |       |       |                                        |                                 |                                                                                                                             |                    |          |                       |              |       |      |                                        |                         |                            |                                            |          |   |                                                                     |                |             |       |       |                                        |                                 |                                                                                                                             |                    |          |                       |              |       |     |                                        |                         |                            |                                            |        |   |                                                                     |                |             |       |       |                                        |                                 |                                                                                         |                    |        |                       |              |       |     |                                        |                         |                            |                                            |        |   |                                                                     |                |       |       |       |                                        |                                 |                                                                                         |                    |        |                       |       |       |     |                                        |                         |                            |                                            |        |   |                                                                     |                |       |       |       |     |                             |                                                                                         |                    |        |                |       |       |     |     |                         |                            |                                            |        |   |                                                                     |                |       |       |       |     |                          |                                                                                         |                    |        |        |       |       |     |     |           |                            |                                            |        |   |                                   |                |       |      |   |   |               |
|                         |                            |                                            | 15 wt%            | 31 wt%                         |                                                                     |                      | 101                                   | 18.0                                         | 27.2                                        | 2.1                                         |                                       |                                                                                                                             |                         | GO                      | Ultem <sup>®</sup> 1000    | Ethylenediamine                            | 0.75 wt% | 0 | CO <sub>2</sub> , CH <sub>4</sub>                                   | 25 °C, 1.0 MPa | 1.926       | 58.4  | -     | -                                       | Filler surface modification           | 1. Eliminating interfacial voids;<br>2. Increasing CO <sub>2</sub> solubility;<br>3. Facilitating CO <sub>2</sub> transport | 2014 <sup>92</sup> | 0.75 wt% | NA                    | 1.570        | 142.7 | -    | -                                       | CMS                     | PES                        | Diethanolamine                             | 30 wt%   | 0 | CO <sub>2</sub> , CH <sub>4</sub>                                   | 25 °C, 1.0 MPa | 44.69 (GPU) | 11.1  | -     | -                                       | Direct physical blending              | 1. Increasing CO <sub>2</sub> solubility<br>2. Facilitating CO <sub>2</sub> transport                                       | 2015 <sup>88</sup> | 30 wt%   | 15 wt%                | 106.65 (GPU) | 51.39 | -    | -                                       | ZIF-90                  | Matrimid <sup>®</sup> 5218 | Ethylenediamine                            | 21 wt%   | 0 | H <sub>2</sub> /CO <sub>2</sub> (50/50)                             | 25 °C, 0.2 MPa | 6           | -     | -     | 5.0 (H <sub>2</sub> /CO <sub>2</sub> )  | Blending and covalently bonding       | 1. Reducing effective pore size;<br>2. Stiffening polymer matrix                                                            | 2015 <sup>89</sup> | 21 wt%   | 0.05625 wt% of filler | 2            | -     | -    | 9.5 (H <sub>2</sub> /CO <sub>2</sub> )  | UiO-66-NH <sub>2</sub>  | Matrimid <sup>®</sup> 5218 | Phenyl acetyl                              | 23 wt%   | 0 | CO <sub>2</sub> , N <sub>2</sub>                                    | RT, 0.24 MPa   | ~24         | -     | ~36.3 | -                                       | Filler surface modification           | Eliminating interfacial voids                                                                                               | 2015 <sup>93</sup> | 23 wt%   | 2-6% of filler        | ~29          | -     | ~37  | -                                       | MWCNTs -NH <sub>2</sub> | Pebax 1657                 | Glycerol triacetate                        | 1 wt%    | 0 | H <sub>2</sub> , CO <sub>2</sub> , CH <sub>4</sub> , N <sub>2</sub> | 35 °C, 0.7 MPa | 202         | ~16.5 | ~51.8 | ~10                                     | Direct physical blending              | 1. Improve filler distribution;<br>2. Increasing fractional free volume                                                     | 2017 <sup>90</sup> | 1 wt%    | 25 wt%                | 1408         | ~14   | ~39  | ~13                                     | Zeolite Y               | Matrimid <sup>®</sup> 5218 | Co <sup>2+</sup> -diamine-diketone complex | 15 wt%   | 0 | CO <sub>2</sub> , CH <sub>4</sub>                                   | 35 °C, 0.2 MPa | 17.52       | 43.3  | -     | -                                       | Encapsulation                   | 1. Reducing effective pore size;<br>2. Increasing CO <sub>2</sub> diffusion selectivity                                     | 2018 <sup>91</sup> | 15 wt%   | NA                    | 18.96        | 111.7 | -    | -                                       |                         |                            |                                            |          |   |                                                                     |                |             |       |       |                                        |                                 |                                                                                                                             |                    |          |                       |              |       |      |                                        |                         |                            |                                            |          |   |                                                                     |                |             |       |       |                                        |                                 |                                                                                                                             |                    |          |                       |              |       |     |                                        |                         |                            |                                            |        |   |                                                                     |                |             |       |       |                                        |                                 |                                                                                         |                    |        |                       |              |       |     |                                        |                         |                            |                                            |        |   |                                                                     |                |       |       |       |                                        |                                 |                                                                                         |                    |        |                       |       |       |     |                                        |                         |                            |                                            |        |   |                                                                     |                |       |       |       |     |                             |                                                                                         |                    |        |                |       |       |     |     |                         |                            |                                            |        |   |                                                                     |                |       |       |       |     |                          |                                                                                         |                    |        |        |       |       |     |     |           |                            |                                            |        |   |                                   |                |       |      |   |   |               |
| GO                      | Ultem <sup>®</sup> 1000    | Ethylenediamine                            | 0.75 wt%          | 0                              | CO <sub>2</sub> , CH <sub>4</sub>                                   | 25 °C, 1.0 MPa       | 1.926                                 | 58.4                                         | -                                           | -                                           | Filler surface modification           | 1. Eliminating interfacial voids;<br>2. Increasing CO <sub>2</sub> solubility;<br>3. Facilitating CO <sub>2</sub> transport | 2014 <sup>92</sup>      |                         |                            |                                            |          |   |                                                                     |                |             |       |       |                                         |                                       |                                                                                                                             |                    |          |                       |              |       |      |                                         |                         |                            |                                            |          |   |                                                                     |                |             |       |       |                                         |                                       |                                                                                                                             |                    |          |                       |              |       |      |                                         |                         |                            |                                            |          |   |                                                                     |                |             |       |       |                                         |                                       |                                                                                                                             |                    |          |                       |              |       |      |                                         |                         |                            |                                            |          |   |                                                                     |                |             |       |       |                                         |                                       |                                                                                                                             |                    |          |                       |              |       |      |                                         |                         |                            |                                            |          |   |                                                                     |                |             |       |       |                                         |                                       |                                                                                                                             |                    |          |                       |              |       |      |                                         |                         |                            |                                            |          |   |                                                                     |                |             |       |       |                                         |                                 |                                                                                                                             |                    |          |                       |              |       |      |                                         |                         |                            |                                            |          |   |                                                                     |                |             |       |       |                                        |                                 |                                                                                                                             |                    |          |                       |              |       |      |                                        |                         |                            |                                            |          |   |                                                                     |                |             |       |       |                                        |                                 |                                                                                                                             |                    |          |                       |              |       |     |                                        |                         |                            |                                            |        |   |                                                                     |                |             |       |       |                                        |                                 |                                                                                         |                    |        |                       |              |       |     |                                        |                         |                            |                                            |        |   |                                                                     |                |       |       |       |                                        |                                 |                                                                                         |                    |        |                       |       |       |     |                                        |                         |                            |                                            |        |   |                                                                     |                |       |       |       |     |                             |                                                                                         |                    |        |                |       |       |     |     |                         |                            |                                            |        |   |                                                                     |                |       |       |       |     |                          |                                                                                         |                    |        |        |       |       |     |     |           |                            |                                            |        |   |                                   |                |       |      |   |   |               |
|                         |                            |                                            | 0.75 wt%          | NA                             |                                                                     |                      | 1.570                                 | 142.7                                        | -                                           | -                                           |                                       |                                                                                                                             |                         | CMS                     | PES                        | Diethanolamine                             | 30 wt%   | 0 | CO <sub>2</sub> , CH <sub>4</sub>                                   | 25 °C, 1.0 MPa | 44.69 (GPU) | 11.1  | -     | -                                       | Direct physical blending              | 1. Increasing CO <sub>2</sub> solubility<br>2. Facilitating CO <sub>2</sub> transport                                       | 2015 <sup>88</sup> | 30 wt%   | 15 wt%                | 106.65 (GPU) | 51.39 | -    | -                                       | ZIF-90                  | Matrimid <sup>®</sup> 5218 | Ethylenediamine                            | 21 wt%   | 0 | H <sub>2</sub> /CO <sub>2</sub> (50/50)                             | 25 °C, 0.2 MPa | 6           | -     | -     | 5.0 (H <sub>2</sub> /CO <sub>2</sub> )  | Blending and covalently bonding       | 1. Reducing effective pore size;<br>2. Stiffening polymer matrix                                                            | 2015 <sup>89</sup> | 21 wt%   | 0.05625 wt% of filler | 2            | -     | -    | 9.5 (H <sub>2</sub> /CO <sub>2</sub> )  | UiO-66-NH <sub>2</sub>  | Matrimid <sup>®</sup> 5218 | Phenyl acetyl                              | 23 wt%   | 0 | CO <sub>2</sub> , N <sub>2</sub>                                    | RT, 0.24 MPa   | ~24         | -     | ~36.3 | -                                       | Filler surface modification           | Eliminating interfacial voids                                                                                               | 2015 <sup>93</sup> | 23 wt%   | 2-6% of filler        | ~29          | -     | ~37  | -                                       | MWCNTs -NH <sub>2</sub> | Pebax 1657                 | Glycerol triacetate                        | 1 wt%    | 0 | H <sub>2</sub> , CO <sub>2</sub> , CH <sub>4</sub> , N <sub>2</sub> | 35 °C, 0.7 MPa | 202         | ~16.5 | ~51.8 | ~10                                     | Direct physical blending              | 1. Improve filler distribution;<br>2. Increasing fractional free volume                                                     | 2017 <sup>90</sup> | 1 wt%    | 25 wt%                | 1408         | ~14   | ~39  | ~13                                     | Zeolite Y               | Matrimid <sup>®</sup> 5218 | Co <sup>2+</sup> -diamine-diketone complex | 15 wt%   | 0 | CO <sub>2</sub> , CH <sub>4</sub>                                   | 35 °C, 0.2 MPa | 17.52       | 43.3  | -     | -                                       | Encapsulation                         | 1. Reducing effective pore size;<br>2. Increasing CO <sub>2</sub> diffusion selectivity                                     | 2018 <sup>91</sup> | 15 wt%   | NA                    | 18.96        | 111.7 | -    | -                                       |                         |                            |                                            |          |   |                                                                     |                |             |       |       |                                         |                                 |                                                                                                                             |                    |          |                       |              |       |      |                                         |                         |                            |                                            |          |   |                                                                     |                |             |       |       |                                        |                                 |                                                                                                                             |                    |          |                       |              |       |      |                                        |                         |                            |                                            |          |   |                                                                     |                |             |       |       |                                        |                                 |                                                                                                                             |                    |          |                       |              |       |     |                                        |                         |                            |                                            |        |   |                                                                     |                |             |       |       |                                        |                                 |                                                                                         |                    |        |                       |              |       |     |                                        |                         |                            |                                            |        |   |                                                                     |                |       |       |       |                                        |                                 |                                                                                         |                    |        |                       |       |       |     |                                        |                         |                            |                                            |        |   |                                                                     |                |       |       |       |     |                             |                                                                                         |                    |        |                |       |       |     |     |                         |                            |                                            |        |   |                                                                     |                |       |       |       |     |                          |                                                                                         |                    |        |        |       |       |     |     |           |                            |                                            |        |   |                                   |                |       |      |   |   |               |
| CMS                     | PES                        | Diethanolamine                             | 30 wt%            | 0                              | CO <sub>2</sub> , CH <sub>4</sub>                                   | 25 °C, 1.0 MPa       | 44.69 (GPU)                           | 11.1                                         | -                                           | -                                           | Direct physical blending              | 1. Increasing CO <sub>2</sub> solubility<br>2. Facilitating CO <sub>2</sub> transport                                       | 2015 <sup>88</sup>      |                         |                            |                                            |          |   |                                                                     |                |             |       |       |                                         |                                       |                                                                                                                             |                    |          |                       |              |       |      |                                         |                         |                            |                                            |          |   |                                                                     |                |             |       |       |                                         |                                       |                                                                                                                             |                    |          |                       |              |       |      |                                         |                         |                            |                                            |          |   |                                                                     |                |             |       |       |                                         |                                       |                                                                                                                             |                    |          |                       |              |       |      |                                         |                         |                            |                                            |          |   |                                                                     |                |             |       |       |                                         |                                       |                                                                                                                             |                    |          |                       |              |       |      |                                         |                         |                            |                                            |          |   |                                                                     |                |             |       |       |                                         |                                       |                                                                                                                             |                    |          |                       |              |       |      |                                         |                         |                            |                                            |          |   |                                                                     |                |             |       |       |                                         |                                 |                                                                                                                             |                    |          |                       |              |       |      |                                         |                         |                            |                                            |          |   |                                                                     |                |             |       |       |                                        |                                 |                                                                                                                             |                    |          |                       |              |       |      |                                        |                         |                            |                                            |          |   |                                                                     |                |             |       |       |                                        |                                 |                                                                                                                             |                    |          |                       |              |       |     |                                        |                         |                            |                                            |        |   |                                                                     |                |             |       |       |                                        |                                 |                                                                                         |                    |        |                       |              |       |     |                                        |                         |                            |                                            |        |   |                                                                     |                |       |       |       |                                        |                                 |                                                                                         |                    |        |                       |       |       |     |                                        |                         |                            |                                            |        |   |                                                                     |                |       |       |       |     |                             |                                                                                         |                    |        |                |       |       |     |     |                         |                            |                                            |        |   |                                                                     |                |       |       |       |     |                          |                                                                                         |                    |        |        |       |       |     |     |           |                            |                                            |        |   |                                   |                |       |      |   |   |               |
|                         |                            |                                            | 30 wt%            | 15 wt%                         |                                                                     |                      | 106.65 (GPU)                          | 51.39                                        | -                                           | -                                           |                                       |                                                                                                                             |                         | ZIF-90                  | Matrimid <sup>®</sup> 5218 | Ethylenediamine                            | 21 wt%   | 0 | H <sub>2</sub> /CO <sub>2</sub> (50/50)                             | 25 °C, 0.2 MPa | 6           | -     | -     | 5.0 (H <sub>2</sub> /CO <sub>2</sub> )  | Blending and covalently bonding       | 1. Reducing effective pore size;<br>2. Stiffening polymer matrix                                                            | 2015 <sup>89</sup> | 21 wt%   | 0.05625 wt% of filler | 2            | -     | -    | 9.5 (H <sub>2</sub> /CO <sub>2</sub> )  | UiO-66-NH <sub>2</sub>  | Matrimid <sup>®</sup> 5218 | Phenyl acetyl                              | 23 wt%   | 0 | CO <sub>2</sub> , N <sub>2</sub>                                    | RT, 0.24 MPa   | ~24         | -     | ~36.3 | -                                       | Filler surface modification           | Eliminating interfacial voids                                                                                               | 2015 <sup>93</sup> | 23 wt%   | 2-6% of filler        | ~29          | -     | ~37  | -                                       | MWCNTs -NH <sub>2</sub> | Pebax 1657                 | Glycerol triacetate                        | 1 wt%    | 0 | H <sub>2</sub> , CO <sub>2</sub> , CH <sub>4</sub> , N <sub>2</sub> | 35 °C, 0.7 MPa | 202         | ~16.5 | ~51.8 | ~10                                     | Direct physical blending              | 1. Improve filler distribution;<br>2. Increasing fractional free volume                                                     | 2017 <sup>90</sup> | 1 wt%    | 25 wt%                | 1408         | ~14   | ~39  | ~13                                     | Zeolite Y               | Matrimid <sup>®</sup> 5218 | Co <sup>2+</sup> -diamine-diketone complex | 15 wt%   | 0 | CO <sub>2</sub> , CH <sub>4</sub>                                   | 35 °C, 0.2 MPa | 17.52       | 43.3  | -     | -                                       | Encapsulation                         | 1. Reducing effective pore size;<br>2. Increasing CO <sub>2</sub> diffusion selectivity                                     | 2018 <sup>91</sup> | 15 wt%   | NA                    | 18.96        | 111.7 | -    | -                                       |                         |                            |                                            |          |   |                                                                     |                |             |       |       |                                         |                                       |                                                                                                                             |                    |          |                       |              |       |      |                                         |                         |                            |                                            |          |   |                                                                     |                |             |       |       |                                         |                                 |                                                                                                                             |                    |          |                       |              |       |      |                                         |                         |                            |                                            |          |   |                                                                     |                |             |       |       |                                        |                                 |                                                                                                                             |                    |          |                       |              |       |      |                                        |                         |                            |                                            |          |   |                                                                     |                |             |       |       |                                        |                                 |                                                                                                                             |                    |          |                       |              |       |     |                                        |                         |                            |                                            |        |   |                                                                     |                |             |       |       |                                        |                                 |                                                                                         |                    |        |                       |              |       |     |                                        |                         |                            |                                            |        |   |                                                                     |                |       |       |       |                                        |                                 |                                                                                         |                    |        |                       |       |       |     |                                        |                         |                            |                                            |        |   |                                                                     |                |       |       |       |     |                             |                                                                                         |                    |        |                |       |       |     |     |                         |                            |                                            |        |   |                                                                     |                |       |       |       |     |                          |                                                                                         |                    |        |        |       |       |     |     |           |                            |                                            |        |   |                                   |                |       |      |   |   |               |
| ZIF-90                  | Matrimid <sup>®</sup> 5218 | Ethylenediamine                            | 21 wt%            | 0                              | H <sub>2</sub> /CO <sub>2</sub> (50/50)                             | 25 °C, 0.2 MPa       | 6                                     | -                                            | -                                           | 5.0 (H <sub>2</sub> /CO <sub>2</sub> )      | Blending and covalently bonding       | 1. Reducing effective pore size;<br>2. Stiffening polymer matrix                                                            | 2015 <sup>89</sup>      |                         |                            |                                            |          |   |                                                                     |                |             |       |       |                                         |                                       |                                                                                                                             |                    |          |                       |              |       |      |                                         |                         |                            |                                            |          |   |                                                                     |                |             |       |       |                                         |                                       |                                                                                                                             |                    |          |                       |              |       |      |                                         |                         |                            |                                            |          |   |                                                                     |                |             |       |       |                                         |                                       |                                                                                                                             |                    |          |                       |              |       |      |                                         |                         |                            |                                            |          |   |                                                                     |                |             |       |       |                                         |                                       |                                                                                                                             |                    |          |                       |              |       |      |                                         |                         |                            |                                            |          |   |                                                                     |                |             |       |       |                                         |                                       |                                                                                                                             |                    |          |                       |              |       |      |                                         |                         |                            |                                            |          |   |                                                                     |                |             |       |       |                                         |                                 |                                                                                                                             |                    |          |                       |              |       |      |                                         |                         |                            |                                            |          |   |                                                                     |                |             |       |       |                                        |                                 |                                                                                                                             |                    |          |                       |              |       |      |                                        |                         |                            |                                            |          |   |                                                                     |                |             |       |       |                                        |                                 |                                                                                                                             |                    |          |                       |              |       |     |                                        |                         |                            |                                            |        |   |                                                                     |                |             |       |       |                                        |                                 |                                                                                         |                    |        |                       |              |       |     |                                        |                         |                            |                                            |        |   |                                                                     |                |       |       |       |                                        |                                 |                                                                                         |                    |        |                       |       |       |     |                                        |                         |                            |                                            |        |   |                                                                     |                |       |       |       |     |                             |                                                                                         |                    |        |                |       |       |     |     |                         |                            |                                            |        |   |                                                                     |                |       |       |       |     |                          |                                                                                         |                    |        |        |       |       |     |     |           |                            |                                            |        |   |                                   |                |       |      |   |   |               |
|                         |                            |                                            | 21 wt%            | 0.05625 wt% of filler          |                                                                     |                      | 2                                     | -                                            | -                                           | 9.5 (H <sub>2</sub> /CO <sub>2</sub> )      |                                       |                                                                                                                             |                         | UiO-66-NH <sub>2</sub>  | Matrimid <sup>®</sup> 5218 | Phenyl acetyl                              | 23 wt%   | 0 | CO <sub>2</sub> , N <sub>2</sub>                                    | RT, 0.24 MPa   | ~24         | -     | ~36.3 | -                                       | Filler surface modification           | Eliminating interfacial voids                                                                                               | 2015 <sup>93</sup> | 23 wt%   | 2-6% of filler        | ~29          | -     | ~37  | -                                       | MWCNTs -NH <sub>2</sub> | Pebax 1657                 | Glycerol triacetate                        | 1 wt%    | 0 | H <sub>2</sub> , CO <sub>2</sub> , CH <sub>4</sub> , N <sub>2</sub> | 35 °C, 0.7 MPa | 202         | ~16.5 | ~51.8 | ~10                                     | Direct physical blending              | 1. Improve filler distribution;<br>2. Increasing fractional free volume                                                     | 2017 <sup>90</sup> | 1 wt%    | 25 wt%                | 1408         | ~14   | ~39  | ~13                                     | Zeolite Y               | Matrimid <sup>®</sup> 5218 | Co <sup>2+</sup> -diamine-diketone complex | 15 wt%   | 0 | CO <sub>2</sub> , CH <sub>4</sub>                                   | 35 °C, 0.2 MPa | 17.52       | 43.3  | -     | -                                       | Encapsulation                         | 1. Reducing effective pore size;<br>2. Increasing CO <sub>2</sub> diffusion selectivity                                     | 2018 <sup>91</sup> | 15 wt%   | NA                    | 18.96        | 111.7 | -    | -                                       |                         |                            |                                            |          |   |                                                                     |                |             |       |       |                                         |                                       |                                                                                                                             |                    |          |                       |              |       |      |                                         |                         |                            |                                            |          |   |                                                                     |                |             |       |       |                                         |                                       |                                                                                                                             |                    |          |                       |              |       |      |                                         |                         |                            |                                            |          |   |                                                                     |                |             |       |       |                                         |                                 |                                                                                                                             |                    |          |                       |              |       |      |                                         |                         |                            |                                            |          |   |                                                                     |                |             |       |       |                                        |                                 |                                                                                                                             |                    |          |                       |              |       |      |                                        |                         |                            |                                            |          |   |                                                                     |                |             |       |       |                                        |                                 |                                                                                                                             |                    |          |                       |              |       |     |                                        |                         |                            |                                            |        |   |                                                                     |                |             |       |       |                                        |                                 |                                                                                         |                    |        |                       |              |       |     |                                        |                         |                            |                                            |        |   |                                                                     |                |       |       |       |                                        |                                 |                                                                                         |                    |        |                       |       |       |     |                                        |                         |                            |                                            |        |   |                                                                     |                |       |       |       |     |                             |                                                                                         |                    |        |                |       |       |     |     |                         |                            |                                            |        |   |                                                                     |                |       |       |       |     |                          |                                                                                         |                    |        |        |       |       |     |     |           |                            |                                            |        |   |                                   |                |       |      |   |   |               |
| UiO-66-NH <sub>2</sub>  | Matrimid <sup>®</sup> 5218 | Phenyl acetyl                              | 23 wt%            | 0                              | CO <sub>2</sub> , N <sub>2</sub>                                    | RT, 0.24 MPa         | ~24                                   | -                                            | ~36.3                                       | -                                           | Filler surface modification           | Eliminating interfacial voids                                                                                               | 2015 <sup>93</sup>      |                         |                            |                                            |          |   |                                                                     |                |             |       |       |                                         |                                       |                                                                                                                             |                    |          |                       |              |       |      |                                         |                         |                            |                                            |          |   |                                                                     |                |             |       |       |                                         |                                       |                                                                                                                             |                    |          |                       |              |       |      |                                         |                         |                            |                                            |          |   |                                                                     |                |             |       |       |                                         |                                       |                                                                                                                             |                    |          |                       |              |       |      |                                         |                         |                            |                                            |          |   |                                                                     |                |             |       |       |                                         |                                       |                                                                                                                             |                    |          |                       |              |       |      |                                         |                         |                            |                                            |          |   |                                                                     |                |             |       |       |                                         |                                       |                                                                                                                             |                    |          |                       |              |       |      |                                         |                         |                            |                                            |          |   |                                                                     |                |             |       |       |                                         |                                 |                                                                                                                             |                    |          |                       |              |       |      |                                         |                         |                            |                                            |          |   |                                                                     |                |             |       |       |                                        |                                 |                                                                                                                             |                    |          |                       |              |       |      |                                        |                         |                            |                                            |          |   |                                                                     |                |             |       |       |                                        |                                 |                                                                                                                             |                    |          |                       |              |       |     |                                        |                         |                            |                                            |        |   |                                                                     |                |             |       |       |                                        |                                 |                                                                                         |                    |        |                       |              |       |     |                                        |                         |                            |                                            |        |   |                                                                     |                |       |       |       |                                        |                                 |                                                                                         |                    |        |                       |       |       |     |                                        |                         |                            |                                            |        |   |                                                                     |                |       |       |       |     |                             |                                                                                         |                    |        |                |       |       |     |     |                         |                            |                                            |        |   |                                                                     |                |       |       |       |     |                          |                                                                                         |                    |        |        |       |       |     |     |           |                            |                                            |        |   |                                   |                |       |      |   |   |               |
|                         |                            |                                            | 23 wt%            | 2-6% of filler                 |                                                                     |                      | ~29                                   | -                                            | ~37                                         | -                                           |                                       |                                                                                                                             |                         | MWCNTs -NH <sub>2</sub> | Pebax 1657                 | Glycerol triacetate                        | 1 wt%    | 0 | H <sub>2</sub> , CO <sub>2</sub> , CH <sub>4</sub> , N <sub>2</sub> | 35 °C, 0.7 MPa | 202         | ~16.5 | ~51.8 | ~10                                     | Direct physical blending              | 1. Improve filler distribution;<br>2. Increasing fractional free volume                                                     | 2017 <sup>90</sup> | 1 wt%    | 25 wt%                | 1408         | ~14   | ~39  | ~13                                     | Zeolite Y               | Matrimid <sup>®</sup> 5218 | Co <sup>2+</sup> -diamine-diketone complex | 15 wt%   | 0 | CO <sub>2</sub> , CH <sub>4</sub>                                   | 35 °C, 0.2 MPa | 17.52       | 43.3  | -     | -                                       | Encapsulation                         | 1. Reducing effective pore size;<br>2. Increasing CO <sub>2</sub> diffusion selectivity                                     | 2018 <sup>91</sup> | 15 wt%   | NA                    | 18.96        | 111.7 | -    | -                                       |                         |                            |                                            |          |   |                                                                     |                |             |       |       |                                         |                                       |                                                                                                                             |                    |          |                       |              |       |      |                                         |                         |                            |                                            |          |   |                                                                     |                |             |       |       |                                         |                                       |                                                                                                                             |                    |          |                       |              |       |      |                                         |                         |                            |                                            |          |   |                                                                     |                |             |       |       |                                         |                                       |                                                                                                                             |                    |          |                       |              |       |      |                                         |                         |                            |                                            |          |   |                                                                     |                |             |       |       |                                         |                                 |                                                                                                                             |                    |          |                       |              |       |      |                                         |                         |                            |                                            |          |   |                                                                     |                |             |       |       |                                        |                                 |                                                                                                                             |                    |          |                       |              |       |      |                                        |                         |                            |                                            |          |   |                                                                     |                |             |       |       |                                        |                                 |                                                                                                                             |                    |          |                       |              |       |     |                                        |                         |                            |                                            |        |   |                                                                     |                |             |       |       |                                        |                                 |                                                                                         |                    |        |                       |              |       |     |                                        |                         |                            |                                            |        |   |                                                                     |                |       |       |       |                                        |                                 |                                                                                         |                    |        |                       |       |       |     |                                        |                         |                            |                                            |        |   |                                                                     |                |       |       |       |     |                             |                                                                                         |                    |        |                |       |       |     |     |                         |                            |                                            |        |   |                                                                     |                |       |       |       |     |                          |                                                                                         |                    |        |        |       |       |     |     |           |                            |                                            |        |   |                                   |                |       |      |   |   |               |
| MWCNTs -NH <sub>2</sub> | Pebax 1657                 | Glycerol triacetate                        | 1 wt%             | 0                              | H <sub>2</sub> , CO <sub>2</sub> , CH <sub>4</sub> , N <sub>2</sub> | 35 °C, 0.7 MPa       | 202                                   | ~16.5                                        | ~51.8                                       | ~10                                         | Direct physical blending              | 1. Improve filler distribution;<br>2. Increasing fractional free volume                                                     | 2017 <sup>90</sup>      |                         |                            |                                            |          |   |                                                                     |                |             |       |       |                                         |                                       |                                                                                                                             |                    |          |                       |              |       |      |                                         |                         |                            |                                            |          |   |                                                                     |                |             |       |       |                                         |                                       |                                                                                                                             |                    |          |                       |              |       |      |                                         |                         |                            |                                            |          |   |                                                                     |                |             |       |       |                                         |                                       |                                                                                                                             |                    |          |                       |              |       |      |                                         |                         |                            |                                            |          |   |                                                                     |                |             |       |       |                                         |                                       |                                                                                                                             |                    |          |                       |              |       |      |                                         |                         |                            |                                            |          |   |                                                                     |                |             |       |       |                                         |                                       |                                                                                                                             |                    |          |                       |              |       |      |                                         |                         |                            |                                            |          |   |                                                                     |                |             |       |       |                                         |                                 |                                                                                                                             |                    |          |                       |              |       |      |                                         |                         |                            |                                            |          |   |                                                                     |                |             |       |       |                                        |                                 |                                                                                                                             |                    |          |                       |              |       |      |                                        |                         |                            |                                            |          |   |                                                                     |                |             |       |       |                                        |                                 |                                                                                                                             |                    |          |                       |              |       |     |                                        |                         |                            |                                            |        |   |                                                                     |                |             |       |       |                                        |                                 |                                                                                         |                    |        |                       |              |       |     |                                        |                         |                            |                                            |        |   |                                                                     |                |       |       |       |                                        |                                 |                                                                                         |                    |        |                       |       |       |     |                                        |                         |                            |                                            |        |   |                                                                     |                |       |       |       |     |                             |                                                                                         |                    |        |                |       |       |     |     |                         |                            |                                            |        |   |                                                                     |                |       |       |       |     |                          |                                                                                         |                    |        |        |       |       |     |     |           |                            |                                            |        |   |                                   |                |       |      |   |   |               |
|                         |                            |                                            | 1 wt%             | 25 wt%                         |                                                                     |                      | 1408                                  | ~14                                          | ~39                                         | ~13                                         |                                       |                                                                                                                             |                         | Zeolite Y               | Matrimid <sup>®</sup> 5218 | Co <sup>2+</sup> -diamine-diketone complex | 15 wt%   | 0 | CO <sub>2</sub> , CH <sub>4</sub>                                   | 35 °C, 0.2 MPa | 17.52       | 43.3  | -     | -                                       | Encapsulation                         | 1. Reducing effective pore size;<br>2. Increasing CO <sub>2</sub> diffusion selectivity                                     | 2018 <sup>91</sup> | 15 wt%   | NA                    | 18.96        | 111.7 | -    | -                                       |                         |                            |                                            |          |   |                                                                     |                |             |       |       |                                         |                                       |                                                                                                                             |                    |          |                       |              |       |      |                                         |                         |                            |                                            |          |   |                                                                     |                |             |       |       |                                         |                                       |                                                                                                                             |                    |          |                       |              |       |      |                                         |                         |                            |                                            |          |   |                                                                     |                |             |       |       |                                         |                                       |                                                                                                                             |                    |          |                       |              |       |      |                                         |                         |                            |                                            |          |   |                                                                     |                |             |       |       |                                         |                                       |                                                                                                                             |                    |          |                       |              |       |      |                                         |                         |                            |                                            |          |   |                                                                     |                |             |       |       |                                         |                                 |                                                                                                                             |                    |          |                       |              |       |      |                                         |                         |                            |                                            |          |   |                                                                     |                |             |       |       |                                        |                                 |                                                                                                                             |                    |          |                       |              |       |      |                                        |                         |                            |                                            |          |   |                                                                     |                |             |       |       |                                        |                                 |                                                                                                                             |                    |          |                       |              |       |     |                                        |                         |                            |                                            |        |   |                                                                     |                |             |       |       |                                        |                                 |                                                                                         |                    |        |                       |              |       |     |                                        |                         |                            |                                            |        |   |                                                                     |                |       |       |       |                                        |                                 |                                                                                         |                    |        |                       |       |       |     |                                        |                         |                            |                                            |        |   |                                                                     |                |       |       |       |     |                             |                                                                                         |                    |        |                |       |       |     |     |                         |                            |                                            |        |   |                                                                     |                |       |       |       |     |                          |                                                                                         |                    |        |        |       |       |     |     |           |                            |                                            |        |   |                                   |                |       |      |   |   |               |
| Zeolite Y               | Matrimid <sup>®</sup> 5218 | Co <sup>2+</sup> -diamine-diketone complex | 15 wt%            | 0                              | CO <sub>2</sub> , CH <sub>4</sub>                                   | 35 °C, 0.2 MPa       | 17.52                                 | 43.3                                         | -                                           | -                                           | Encapsulation                         | 1. Reducing effective pore size;<br>2. Increasing CO <sub>2</sub> diffusion selectivity                                     | 2018 <sup>91</sup>      |                         |                            |                                            |          |   |                                                                     |                |             |       |       |                                         |                                       |                                                                                                                             |                    |          |                       |              |       |      |                                         |                         |                            |                                            |          |   |                                                                     |                |             |       |       |                                         |                                       |                                                                                                                             |                    |          |                       |              |       |      |                                         |                         |                            |                                            |          |   |                                                                     |                |             |       |       |                                         |                                       |                                                                                                                             |                    |          |                       |              |       |      |                                         |                         |                            |                                            |          |   |                                                                     |                |             |       |       |                                         |                                       |                                                                                                                             |                    |          |                       |              |       |      |                                         |                         |                            |                                            |          |   |                                                                     |                |             |       |       |                                         |                                       |                                                                                                                             |                    |          |                       |              |       |      |                                         |                         |                            |                                            |          |   |                                                                     |                |             |       |       |                                         |                                 |                                                                                                                             |                    |          |                       |              |       |      |                                         |                         |                            |                                            |          |   |                                                                     |                |             |       |       |                                        |                                 |                                                                                                                             |                    |          |                       |              |       |      |                                        |                         |                            |                                            |          |   |                                                                     |                |             |       |       |                                        |                                 |                                                                                                                             |                    |          |                       |              |       |     |                                        |                         |                            |                                            |        |   |                                                                     |                |             |       |       |                                        |                                 |                                                                                         |                    |        |                       |              |       |     |                                        |                         |                            |                                            |        |   |                                                                     |                |       |       |       |                                        |                                 |                                                                                         |                    |        |                       |       |       |     |                                        |                         |                            |                                            |        |   |                                                                     |                |       |       |       |     |                             |                                                                                         |                    |        |                |       |       |     |     |                         |                            |                                            |        |   |                                                                     |                |       |       |       |     |                          |                                                                                         |                    |        |        |       |       |     |     |           |                            |                                            |        |   |                                   |                |       |      |   |   |               |
|                         |                            |                                            | 15 wt%            | NA                             |                                                                     |                      | 18.96                                 | 111.7                                        | -                                           | -                                           |                                       |                                                                                                                             |                         |                         |                            |                                            |          |   |                                                                     |                |             |       |       |                                         |                                       |                                                                                                                             |                    |          |                       |              |       |      |                                         |                         |                            |                                            |          |   |                                                                     |                |             |       |       |                                         |                                       |                                                                                                                             |                    |          |                       |              |       |      |                                         |                         |                            |                                            |          |   |                                                                     |                |             |       |       |                                         |                                       |                                                                                                                             |                    |          |                       |              |       |      |                                         |                         |                            |                                            |          |   |                                                                     |                |             |       |       |                                         |                                       |                                                                                                                             |                    |          |                       |              |       |      |                                         |                         |                            |                                            |          |   |                                                                     |                |             |       |       |                                         |                                       |                                                                                                                             |                    |          |                       |              |       |      |                                         |                         |                            |                                            |          |   |                                                                     |                |             |       |       |                                         |                                 |                                                                                                                             |                    |          |                       |              |       |      |                                         |                         |                            |                                            |          |   |                                                                     |                |             |       |       |                                        |                                 |                                                                                                                             |                    |          |                       |              |       |      |                                        |                         |                            |                                            |          |   |                                                                     |                |             |       |       |                                        |                                 |                                                                                                                             |                    |          |                       |              |       |     |                                        |                         |                            |                                            |        |   |                                                                     |                |             |       |       |                                        |                                 |                                                                                         |                    |        |                       |              |       |     |                                        |                         |                            |                                            |        |   |                                                                     |                |       |       |       |                                        |                                 |                                                                                         |                    |        |                       |       |       |     |                                        |                         |                            |                                            |        |   |                                                                     |                |       |       |       |     |                             |                                                                                         |                    |        |                |       |       |     |     |                         |                            |                                            |        |   |                                                                     |                |       |       |       |     |                          |                                                                                         |                    |        |        |       |       |     |     |           |                            |                                            |        |   |                                   |                |       |      |   |   |               |

Table S1. (continued)

| Filler                 | Polymer        | The third component     | Loading of filler | Loading of the third component | Feed gas                                                                    | Operation conditions | CO <sub>2</sub> permeability (Barrer)      | CO <sub>2</sub> /CH <sub>4</sub> selectivity | CO <sub>2</sub> /N <sub>2</sub> selectivity | CO <sub>2</sub> /H <sub>2</sub> selectivity | Methodology                 | Role of the third component                                             | Published year and ref. |
|------------------------|----------------|-------------------------|-------------------|--------------------------------|-----------------------------------------------------------------------------|----------------------|--------------------------------------------|----------------------------------------------|---------------------------------------------|---------------------------------------------|-----------------------------|-------------------------------------------------------------------------|-------------------------|
| UiO-66-NH <sub>2</sub> | Polynorbornene | Norbornene              | 0                 | 0                              | CO <sub>2</sub> , H <sub>2</sub> , N <sub>2</sub>                           | 30 °C, 0.3 MPa       | 16.4                                       | -                                            | -                                           | 3.3 (H <sub>2</sub> /CO <sub>2</sub> )      | Filler surface modification | 1. Eliminating interfacial voids;<br>2. Improving mechanical properties | 2018 <sup>94</sup>      |
|                        |                |                         | 50 wt%            | NA                             |                                                                             |                      | 31.2                                       | -                                            | -                                           | 6.8 (H <sub>2</sub> /CO <sub>2</sub> )      |                             |                                                                         |                         |
| UiO-66-NH <sub>2</sub> | PIM-1          | 4-cyanobenzoyl chloride | 20 wt%            | 0                              | CO <sub>2</sub> , N <sub>2</sub><br>CO <sub>2</sub> /N <sub>2</sub> (50/50) | 25 °C, 0.14 MPa      | 8619.5 (Single gas)                        | -                                            | 18.0 (Single gas)                           | -                                           | Filler modification         | Reducing pore blockage                                                  | 2019 <sup>95</sup>      |
|                        |                |                         | 20 wt%            | NA                             |                                                                             |                      | 16121.3 (Single gas)                       | -                                            | 27.0 (Single gas)                           | -                                           |                             |                                                                         |                         |
|                        |                |                         |                   |                                |                                                                             |                      | 12063.3 (CO <sub>2</sub> /N <sub>2</sub> ) |                                              | 53.5 (CO <sub>2</sub> /N <sub>2</sub> )     |                                             |                             |                                                                         |                         |

Table S2. Summary of the reported MMMs containing macromolecules as the third component for CO<sub>2</sub> separation. The literatures are ordered chronologically in each category (PEG, PDA, PEI, and other macromolecules).

| Filler                      | Polymer        | The third component | Loading of filler | Loading of the third component | Feed gas                                                            | Operation conditions            | CO <sub>2</sub> permeability (Barrer) | CO <sub>2</sub> /CH <sub>4</sub> selectivity | CO <sub>2</sub> /N <sub>2</sub> selectivity | CO <sub>2</sub> /H <sub>2</sub> selectivity | Methodology                         | Role of the third component                                                                                                   | Published year and ref. |
|-----------------------------|----------------|---------------------|-------------------|--------------------------------|---------------------------------------------------------------------|---------------------------------|---------------------------------------|----------------------------------------------|---------------------------------------------|---------------------------------------------|-------------------------------------|-------------------------------------------------------------------------------------------------------------------------------|-------------------------|
| MWCNT                       | PIM-1          | PEG 200             | 1 wt%             | 0                              | CO <sub>2</sub> , CH <sub>4</sub> , N <sub>2</sub>                  | 27 °C, 0.2 MPa                  | 6130                                  | 8.1                                          | 16.3                                        | -                                           | Filler surface modification         | 1. Improving filler distribution;<br>2. Eliminating interfacial voids;<br>3. Increasing CO <sub>2</sub> solubility            | 2012 <sup>99</sup>      |
|                             |                |                     | 1 wt%             | ~2 wt% of filler               |                                                                     |                                 | 7090                                  | 10.4                                         | 33.0                                        | -                                           |                                     |                                                                                                                               |                         |
| MWCNT                       | PIM-1          | PEG 200             | 1 wt%             | 0                              | CO <sub>2</sub> , CH <sub>4</sub> , N <sub>2</sub>                  | 30 °C, 0.2 MPa                  | 6219                                  | 8.2                                          | 17.2                                        | -                                           | Filler surface modification         | 1. Improving filler distribution;<br>2. Increasing CO <sub>2</sub> solubility                                                 | 2013 <sup>100</sup>     |
|                             |                |                     | 1 wt%             | NA                             |                                                                     |                                 | 7813                                  | 9.9                                          | 18.7                                        | -                                           |                                     |                                                                                                                               |                         |
| GO                          | Ultem® 1000    | PEG 400             | 0.75 wt%          | 0                              | CO <sub>2</sub> , CH <sub>4</sub>                                   | 25 °C, 1.0 MPa                  | 1.926                                 | 58.4                                         | -                                           | -                                           | Filler surface modification         | 1. Eliminating interfacial voids;<br>2. Increasing CO <sub>2</sub> solubility                                                 | 2014 <sup>92</sup>      |
|                             |                |                     | 0.75 wt%          | NA                             |                                                                     |                                 | 1.197                                 | 74.8                                         | -                                           | -                                           |                                     |                                                                                                                               |                         |
| Mesoporous TiO <sub>2</sub> | PVC-g-POEM     | Amino silane-PEGDE  | 20 wt%            | 0                              | CO <sub>2</sub> , N <sub>2</sub>                                    | 35 °C, ~0.1 MPa                 | 127.35                                | -                                            | 17.7                                        | -                                           | Filler surface modification         | 1. Increasing CO <sub>2</sub> solubility;<br>2. Eliminating interfacial voids                                                 | 2014 <sup>101</sup>     |
|                             |                |                     | 20 wt%            | 15 wt% of filler               |                                                                     |                                 | 79.33                                 | -                                            | 41.1                                        | -                                           |                                     |                                                                                                                               |                         |
| ZSM-5                       | Matrimid® 5218 | PEG 200             | 5 wt%             | 0                              | CO <sub>2</sub> , CH <sub>4</sub>                                   | 35 °C, 1.0 MPa                  | 8.63                                  | 53.9                                         | -                                           | -                                           | Direct physical blending            | 1. Eliminating interfacial voids;<br>2. Increasing CO <sub>2</sub> solubility                                                 | 2015 <sup>96</sup>      |
|                             |                |                     | 5 wt%             | 5 wt%                          |                                                                     |                                 | 11.53                                 | 60.1                                         | -                                           | -                                           |                                     |                                                                                                                               |                         |
| NaX                         | Pebax 1657     | PEG 200             | 10 wt%            | 0                              | CO <sub>2</sub> , CH <sub>4</sub>                                   | 25 °C, 0.8 MPa                  | 57                                    | 27                                           | -                                           | -                                           | Direct physical blending            | 1. Increasing fractional free volume;<br>2. Increasing CO <sub>2</sub> solubility                                             | 2015 <sup>98</sup>      |
|                             |                |                     | 10 wt%            | 30 wt%                         |                                                                     |                                 | 95                                    | 45                                           | -                                           | -                                           |                                     |                                                                                                                               |                         |
| GO                          | Pebax 1657     | PEGME 5000          | 10 wt%            | 0                              | CO <sub>2</sub> , CH <sub>4</sub> , N <sub>2</sub>                  | 30 °C, 0.2 MPa, humid condition | ~255                                  | ~25                                          | ~59                                         | -                                           | Filler surface modification         | Increasing CO <sub>2</sub> solubility                                                                                         | 2015 <sup>102</sup>     |
|                             |                |                     | 10 wt%            | NA                             |                                                                     |                                 | ~720                                  | ~27                                          | ~64                                         | -                                           |                                     |                                                                                                                               |                         |
| UiO-66-NH <sub>2</sub>      | Polyactive     | PEGMA Mw=475        | 20 wt%            | 0                              | CO <sub>2</sub> , N <sub>2</sub>                                    | 35 °C, 0.3 MPa                  | 5870                                  | -                                            | 2.1                                         | -                                           | Filler surface modification         | 1. Improving filler distribution;<br>2. Eliminating interfacial voids;<br>3. Increasing CO <sub>2</sub> diffusion selectivity | 2017 <sup>103</sup>     |
|                             |                |                     | 20 wt%            | 46.5 wt% of filler             |                                                                     |                                 | 329                                   | -                                            | 47                                          | -                                           |                                     |                                                                                                                               |                         |
| ZIF-8                       | Matrimid® 5218 | PEG 200             | 30 wt%            | 0                              | CO <sub>2</sub> /CH <sub>4</sub> (50/50)                            | 25 °C, 0.8 MPa                  | 31.5                                  | 10.7                                         | -                                           | -                                           | Direct physical blending            | Increasing CO <sub>2</sub> solubility                                                                                         | 2019 <sup>97</sup>      |
|                             |                |                     | 30 wt%            | 4 wt%                          |                                                                     |                                 | 33.1                                  | 15.4                                         | -                                           | -                                           |                                     |                                                                                                                               |                         |
| UiO-66-NH <sub>2</sub>      | PVAm           | PEGDE               | 28.5 wt%          | 0                              | CO <sub>2</sub> /N <sub>2</sub> (15/85)                             | 25 °C, 0.3 MPa, humid condition | 989 (GPU)                             | -                                            | 81                                          | -                                           | Filler surface modification         | Eliminating interfacial voids                                                                                                 | 2019 <sup>104</sup>     |
|                             |                |                     | 28.5 wt%          | NA                             |                                                                     |                                 | 1295 (GPU)                            | -                                            | 91                                          | -                                           |                                     |                                                                                                                               |                         |
| ZIF-8                       | TBDA2-6FDA-PI  | PDA                 | 30 wt%            | 0                              | CO <sub>2</sub> , H <sub>2</sub> , CH <sub>4</sub> , N <sub>2</sub> | 35 °C, 0.1 MPa                  | 1437                                  | 16                                           | 12                                          | 1.8 (H <sub>2</sub> /CO <sub>2</sub> )      | Filler surface coating modification | Eliminating interfacial voids                                                                                                 | 2016 <sup>109</sup>     |
|                             |                |                     | 30 wt%            | 1-2 nm thick coating           |                                                                     |                                 | 1056                                  | 20                                           | 14                                          | 1.8 (H <sub>2</sub> /CO <sub>2</sub> )      |                                     |                                                                                                                               |                         |
| ZIF-8                       | Pebax 4033     | PDA                 | 15 wt%            | 0                              | CO <sub>2</sub> , N <sub>2</sub>                                    | 25 °C, 0.1 MPa                  | 170                                   | -                                            | 44.9                                        | -                                           | Filler surface coating modification | 1. Eliminating interfacial voids;<br>2. Facilitating CO <sub>2</sub> transport                                                | 2016 <sup>110</sup>     |
|                             |                |                     | 15 wt%            | ~8.3 wt% of filler             |                                                                     |                                 | 220                                   | -                                            | 56.1                                        | -                                           |                                     |                                                                                                                               |                         |

Table S2. (continued)

| Filler           | Polymer          | The third component | Loading of filler | Loading of the third component               | Feed gas                                                                          | Operation conditions            | CO <sub>2</sub> permeability (Barrer)                                                 | CO <sub>2</sub> /CH <sub>4</sub> selectivity | CO <sub>2</sub> /N <sub>2</sub> selectivity | CO <sub>2</sub> /H <sub>2</sub> selectivity | Methodology                                          | Role of the third component                                                            | Published year and ref. |
|------------------|------------------|---------------------|-------------------|----------------------------------------------|-----------------------------------------------------------------------------------|---------------------------------|---------------------------------------------------------------------------------------|----------------------------------------------|---------------------------------------------|---------------------------------------------|------------------------------------------------------|----------------------------------------------------------------------------------------|-------------------------|
| MCM-41           | Pebax 1657       | PEI                 | 20 wt%            | 0                                            | CO <sub>2</sub> , CH <sub>4</sub> , N <sub>2</sub>                                | 25 °C, 0.2 MPa, humid condition | 752                                                                                   | 19                                           | 52                                          | -                                           | Impregnation                                         | 1. Facilitating CO <sub>2</sub> transport;<br>2. Eliminating interfacial voids         | 2014 <sup>122</sup>     |
|                  |                  |                     | 20 wt%            | ~50 wt% of filler                            |                                                                                   |                                 | 1521                                                                                  | 41                                           | 102                                         | -                                           |                                                      |                                                                                        |                         |
| TiO <sub>2</sub> | SPEEK            | PDA-PEI             | 15 wt%            | 0                                            | CO <sub>2</sub> , CH <sub>4</sub> , N <sub>2</sub>                                | 25 °C, 0.1 MPa, humid condition | 565                                                                                   | 23                                           | 38                                          | -                                           | Filler surface modification                          | 1. Facilitating CO <sub>2</sub> transport;<br>2. Eliminating interfacial voids         | 2014 <sup>114</sup>     |
|                  |                  |                     | 15 wt%            | 13.23 wt% (PDA) and 4.12 wt% (PEI) of filler |                                                                                   |                                 | 1629                                                                                  | 58                                           | 64                                          | -                                           |                                                      |                                                                                        |                         |
| GO               | Pebax 1657       | PEI                 | 10 wt%            | 0                                            | CO <sub>2</sub> , CH <sub>4</sub> , N <sub>2</sub>                                | 30 °C, 0.2 MPa, humid condition | ~255                                                                                  | ~25                                          | ~59                                         | -                                           | Filler surface modification                          | 1. Increasing CO <sub>2</sub> solubility;<br>2. Facilitating CO <sub>2</sub> transport | 2015 <sup>102</sup>     |
|                  |                  |                     | 10 wt%            | 38 wt% of filler                             |                                                                                   |                                 | ~1090                                                                                 | ~32                                          | ~104                                        | -                                           |                                                      |                                                                                        |                         |
| MIL-101(Cr)      | SPEEK            | PEI                 | 40 wt%            | 0                                            | CO <sub>2</sub> /CH <sub>4</sub> (30/70), CO <sub>2</sub> /N <sub>2</sub> (10/90) | 25 °C, 0.1 MPa, humid condition | ~1580 (CO <sub>2</sub> /CH <sub>4</sub> )<br>~1530 (CO <sub>2</sub> /N <sub>2</sub> ) | 29                                           | 37.5                                        | -                                           | Impregnation                                         | 1. Eliminating interfacial voids;<br>2. Facilitating CO <sub>2</sub> transport         | 2015 <sup>119</sup>     |
|                  |                  |                     | 40 wt%            | 22 wt% of filler                             |                                                                                   |                                 | ~2350 (CO <sub>2</sub> /CH <sub>4</sub> )<br>~2450 (CO <sub>2</sub> /N <sub>2</sub> ) | 69                                           | 78                                          | -                                           |                                                      |                                                                                        |                         |
| SiO <sub>2</sub> | Cross-linked PEG | PDA-PEI             | 5 wt%             | 0                                            | CO <sub>2</sub> , N <sub>2</sub>                                                  | 35 °C, 0.35 MPa                 | ~1600 (GPU)                                                                           | -                                            | 15.4                                        | -                                           | Co-deposition on filler surface with PDA             | 1. Facilitating CO <sub>2</sub> transport;<br>2. Eliminating interfacial voids         | 2016 <sup>115</sup>     |
|                  |                  |                     | 5 wt%             | NA                                           |                                                                                   |                                 | 1290 (GPU)                                                                            | -                                            | 27                                          | -                                           |                                                      |                                                                                        |                         |
| CAU-1            | XLPEO            | PEI                 | 30 wt%            | 0                                            | CO <sub>2</sub> /CH <sub>4</sub> (50/50)                                          | 35 °C, 0.3 MPa                  | 7450                                                                                  | 9.8                                          | -                                           | -                                           | Filler surface modification                          | 1. Improving filler distribution;<br>2. Facilitating CO <sub>2</sub> transport         | 2018 <sup>126</sup>     |
|                  |                  |                     | 30 wt%            | NA                                           |                                                                                   |                                 | 546                                                                                   | 27.8                                         | -                                           | -                                           |                                                      |                                                                                        |                         |
| ZIF-8            | PVAm             | PEI                 | 16.7 wt%          | 0                                            | CO <sub>2</sub> /CH <sub>4</sub> (10/90), CO <sub>2</sub> /N <sub>2</sub> (15/85) | 25 °C, 0.3 MPa                  | ~1136 (GPU)                                                                           | 28.0                                         | 65.0                                        | -                                           | In situ grafting modification during ZIF-8 synthesis | 1. Eliminating interfacial voids;<br>2. Increasing CO <sub>2</sub> solubility          | 2018 <sup>127</sup>     |
|                  |                  |                     | 16.7 wt%          | NA                                           |                                                                                   |                                 | ~1890 (GPU)                                                                           | 40.7                                         | 79.9                                        | -                                           |                                                      |                                                                                        |                         |
| TiO <sub>2</sub> | Pebax 1657       | PDA-PEI             | 3 wt%             | 0                                            | CO <sub>2</sub> , N <sub>2</sub>                                                  | 20 °C, 0.3 MPa                  | 126                                                                                   | -                                            | 63                                          | -                                           | Co-deposition on filler surface with PDA             | 1. Facilitating CO <sub>2</sub> transport;<br>2. Eliminating interfacial voids         | 2019 <sup>116</sup>     |
|                  |                  |                     | 3 wt%             | NA                                           |                                                                                   |                                 | 67                                                                                    | -                                            | 101                                         | -                                           |                                                      |                                                                                        |                         |
| COF-300          | 6FDA-DAM         | PEI                 | 7 wt%             | 0                                            | CO <sub>2</sub> /CH <sub>4</sub> (50/50), CO <sub>2</sub> /N <sub>2</sub> (50/50) | 25 °C, 0.1 MPa                  | 1185 (CO <sub>2</sub> /CH <sub>4</sub> )<br>1205 (CO <sub>2</sub> /N <sub>2</sub> )   | 30.3                                         | 32.6                                        | -                                           | Filler surface modification                          | 1. Eliminating interfacial voids;<br>2. Increasing CO <sub>2</sub> solubility          | 2019 <sup>128</sup>     |
|                  |                  |                     | 7 wt%             | 17 wt% of filler                             |                                                                                   |                                 | 1023 (CO <sub>2</sub> /CH <sub>4</sub> )<br>1088 (CO <sub>2</sub> /N <sub>2</sub> )   | 40.5                                         | 44.5                                        | -                                           |                                                      |                                                                                        |                         |
| COF-300          | Pebax 1657       | PEI                 | 10 wt%            | 0                                            | CO <sub>2</sub> /CH <sub>4</sub> (50/50), CO <sub>2</sub> /N <sub>2</sub> (50/50) | 25 °C, 0.1 MPa                  | 107 (CO <sub>2</sub> /CH <sub>4</sub> )<br>125 (CO <sub>2</sub> /N <sub>2</sub> )     | 25.5                                         | 56.6                                        | -                                           | Filler surface modification                          | 1. Eliminating interfacial voids;<br>2. Increasing CO <sub>2</sub> solubility          | 2019 <sup>128</sup>     |
|                  |                  |                     | 10 wt%            | 17 wt% of filler                             |                                                                                   |                                 | 101 (CO <sub>2</sub> /CH <sub>4</sub> )<br>112 (CO <sub>2</sub> /N <sub>2</sub> )     | 36.2                                         | 72.1                                        | -                                           |                                                      |                                                                                        |                         |
| Pd NPs           | PSF              | PVP                 | 0                 | 0                                            | CO <sub>2</sub> , H <sub>2</sub>                                                  | RT, 0.1 MPa                     | 303 (GPU)                                                                             | -                                            | -                                           | 4.4 (H <sub>2</sub> /CO <sub>2</sub> )      | Direct physical blending                             | Improving filler distribution                                                          | 2014 <sup>129</sup>     |
|                  |                  |                     | 2 wt%             | NA                                           |                                                                                   |                                 | 3124 (GPU)                                                                            | -                                            | -                                           | 6.2 (H <sub>2</sub> /CO <sub>2</sub> )      |                                                      |                                                                                        |                         |

Table S2. (continued)

| Filler                 | Polymer        | The third component            | Loading of filler | Loading of the third component | Feed gas                                                                                                                   | Operation conditions            | CO <sub>2</sub> permeability (Barrer)                | CO <sub>2</sub> /CH <sub>4</sub> selectivity         | CO <sub>2</sub> /N <sub>2</sub> selectivity | CO <sub>2</sub> /H <sub>2</sub> selectivity | Methodology                                                                    | Role of the third component                                                                                                       | Published year and ref. |
|------------------------|----------------|--------------------------------|-------------------|--------------------------------|----------------------------------------------------------------------------------------------------------------------------|---------------------------------|------------------------------------------------------|------------------------------------------------------|---------------------------------------------|---------------------------------------------|--------------------------------------------------------------------------------|-----------------------------------------------------------------------------------------------------------------------------------|-------------------------|
| CNT                    | Matrimid® 5218 | Polyzwitterion [poly(SBMA)]    | 0                 | 0                              | CO <sub>2</sub> , CH <sub>4</sub> (30/70)                                                                                  | 30 °C, 0.2 MPa                  | 6.2 (dry, Single gas)                                | 42.8 (dry, Single gas)                               | -                                           | -                                           | Filler surface coating via precipitation polymerization                        | Facilitating CO <sub>2</sub> transport                                                                                            | 2014 <sup>130</sup>     |
|                        |                |                                | 5 wt%             | NA                             |                                                                                                                            |                                 | 49.8 (humidified, CO <sub>2</sub> /CH <sub>4</sub> ) | 39.5 (humidified, CO <sub>2</sub> /CH <sub>4</sub> ) |                                             |                                             |                                                                                |                                                                                                                                   |                         |
| CNT                    | Pebax 1657     | N-isopropylacrylamide hydrogel | 0                 | 0                              | CO <sub>2</sub> /CH <sub>4</sub> (10/90), CO <sub>2</sub> /N <sub>2</sub> (10/90)                                          | 25 °C, 0.2 MPa, humid condition | 280 (CO <sub>2</sub> /CH <sub>4</sub> )              | ~30                                                  | ~53                                         | -                                           | Filler surface coating via <i>in situ</i> atom transfer radical polymerization | Facilitating CO <sub>2</sub> transport                                                                                            | 2016 <sup>131</sup>     |
|                        |                |                                | 5 wt%             | NA                             |                                                                                                                            |                                 | 310 (CO <sub>2</sub> /N <sub>2</sub> )               | 530 (CO <sub>2</sub> /CH <sub>4</sub> )              | ~38.7                                       |                                             |                                                                                |                                                                                                                                   |                         |
| TiO <sub>2</sub>       | Pebax 1657     | Carboxymethyl chitosan         | 3 wt%             | 0                              | CO <sub>2</sub> , N <sub>2</sub>                                                                                           | 25 °C, 2.0 MPa                  | ~148                                                 | -                                                    | ~74                                         | -                                           | Filler surface modification                                                    | 1. Eliminating interfacial voids; 2. Increasing CO <sub>2</sub> solubility                                                        | 2017 <sup>75</sup>      |
|                        |                |                                | 3 wt%             | ~4.2 wt% of filler             |                                                                                                                            |                                 | 194.6                                                | -                                                    | 82.4                                        |                                             |                                                                                |                                                                                                                                   |                         |
| PMAA submicrocapsules  | SPEEK          | Poly(1-vinylimidazole)         | 20 wt%            | 0                              | CO <sub>2</sub> , CH <sub>4</sub> , N <sub>2</sub>                                                                         | 25 °C, 0.1 MPa, humid condition | 1708                                                 | 58.5                                                 | 62.3                                        | -                                           | Filler surface modification                                                    | Facilitating CO <sub>2</sub> transport                                                                                            | 2017 <sup>133</sup>     |
|                        |                |                                | 20 wt%            | NA                             |                                                                                                                            |                                 | 2236                                                 | 73.8                                                 | 76.3                                        |                                             |                                                                                |                                                                                                                                   |                         |
| UiO-66-NH <sub>2</sub> | ODPA-DAM       | Polyimide                      | 27 wt%            | 0                              | CO <sub>2</sub> , CH <sub>4</sub> , N <sub>2</sub>                                                                         | 35 °C, 0.31 MPa                 | 229                                                  | 19                                                   | 9                                           | -                                           | Filler surface modification                                                    | Eliminating interfacial voids                                                                                                     | 2018 <sup>135</sup>     |
|                        |                |                                | 27 wt%            | NA                             |                                                                                                                            |                                 | 142                                                  | 44                                                   | 27                                          |                                             |                                                                                |                                                                                                                                   |                         |
| Graphene NPs           | Chitosan       | Silk fibroin                   | 0.5 wt%           | 0                              | CO <sub>2</sub> /N <sub>2</sub> (20/80), CO <sub>2</sub> /N <sub>2</sub> /H <sub>2</sub> (10/80/10)                        | 90 °C, 0.2 MPa                  | ~47 (GPU, CO <sub>2</sub> /N <sub>2</sub> )          | -                                                    | 57                                          | -                                           | Direct physical blending                                                       | 1. Improving mechanical properties; 2. Facilitating CO <sub>2</sub> transport                                                     | 2018 <sup>132</sup>     |
|                        |                |                                | 0.5 wt%           | 45 wt%                         |                                                                                                                            |                                 | 159 (GPU, CO <sub>2</sub> /N <sub>2</sub> )          | -                                                    | 93 (CO <sub>2</sub> /N <sub>2</sub> )       |                                             |                                                                                |                                                                                                                                   |                         |
| Halloysite nanotube    | SPEEK          | Polyaniline                    | 0.9 wt%           | 0                              | CO <sub>2</sub> , N <sub>2</sub>                                                                                           | 25 °C, 0.1 MPa, humid condition | ~1093                                                | -                                                    | 74                                          | -                                           | Filler modification                                                            | Facilitating CO <sub>2</sub> transport                                                                                            | 2019 <sup>134</sup>     |
|                        |                |                                | 0.9 wt%           | NA                             |                                                                                                                            |                                 | ~1260                                                | -                                                    | 87                                          |                                             |                                                                                |                                                                                                                                   |                         |
| COF                    | PVAm           | Immobilized PVAm               | 10 wt%            | 0                              | CO <sub>2</sub> /CH <sub>4</sub> (10/90), CO <sub>2</sub> /N <sub>2</sub> (15/85), CO <sub>2</sub> /H <sub>2</sub> (40/60) | 25 °C, 0.15 MPa                 | ~1810 (GPU)                                          | -                                                    | ~73                                         | -                                           | Filler modification                                                            | 1. Eliminating interfacial voids; 2. Facilitating CO <sub>2</sub> transport through pore channels and crowding out N <sub>2</sub> | 2019 <sup>137</sup>     |
|                        |                |                                | 10 wt%            | NA                             |                                                                                                                            |                                 | 1678 (GPU, CO <sub>2</sub> /CH <sub>4</sub> )        | 60.4                                                 | 86.01                                       |                                             |                                                                                |                                                                                                                                   |                         |
| UiO-66-Allyl           | PDMS           | PDMS                           | 50 wt%            | 0                              | CO <sub>2</sub> , N <sub>2</sub>                                                                                           | RT, 0.4 MPa                     | ~20000                                               | -                                                    | ~1.0                                        | -                                           | Filler modification                                                            | 1. Improving filler distribution; 2. Eliminating interfacial voids                                                                | 2019 <sup>138</sup>     |
|                        |                |                                | 50 wt%            | 3.8 wt% of filler              |                                                                                                                            |                                 | ~5100                                                | -                                                    | ~10.4                                       |                                             |                                                                                |                                                                                                                                   |                         |
| UiO-66-NH <sub>2</sub> | 6FDA-Durene    | 6FDA-Durene oligomer           | 0                 | 0                              | CO <sub>2</sub> , CH <sub>4</sub> , N <sub>2</sub> (50/50)                                                                 | 35 °C, 0.1 MPa                  | 1280 (CO <sub>2</sub> /CH <sub>4</sub> )             | 15.4 (CO <sub>2</sub> /CH <sub>4</sub> )             | 14.8                                        | -                                           | Filler modification                                                            | 1. Improving filler distribution; 2. Eliminating interfacial voids                                                                | 2019 <sup>136</sup>     |
|                        |                |                                | 40 wt%            | 3.8 wt% of filler              |                                                                                                                            |                                 | 1180 (CO <sub>2</sub> /CH <sub>4</sub> )             | 17.7 (CO <sub>2</sub> /CH <sub>4</sub> )             | 17.4                                        |                                             |                                                                                |                                                                                                                                   |                         |



Table S3. Summary of the reported MMMs containing porous materials as the third component for CO<sub>2</sub> separation. The literatures are ordered chronologically in each category (MOFs and COFs, Carbon materials, and other porous materials).

| Filler                      | Polymer     | The third component          | Loading of filler | Loading of the third component | Feed gas                                                                             | Operation conditions | CO <sub>2</sub> permeability (Barrer)                                             | CO <sub>2</sub> /CH <sub>4</sub> selectivity | CO <sub>2</sub> /N <sub>2</sub> selectivity | CO <sub>2</sub> /H <sub>2</sub> selectivity | Methodology                                   | Role of the third component                                                                     | Published year and ref. |
|-----------------------------|-------------|------------------------------|-------------------|--------------------------------|--------------------------------------------------------------------------------------|----------------------|-----------------------------------------------------------------------------------|----------------------------------------------|---------------------------------------------|---------------------------------------------|-----------------------------------------------|-------------------------------------------------------------------------------------------------|-------------------------|
| Silicalite-1                | PSF         | HKUST-1                      | 16 wt%            | 0                              | CO <sub>2</sub> /CH <sub>4</sub> (50/50),<br>CO <sub>2</sub> /N <sub>2</sub> (50/50) | 35 °C, 0.275 MPa     | 9.6 (CO <sub>2</sub> /CH <sub>4</sub> )<br>9.3 (CO <sub>2</sub> /N <sub>2</sub> ) | 21.0                                         | 22.0                                        | -                                           | Direct physical blending                      | Increasing CO <sub>2</sub> solubility                                                           | 2011 <sup>144</sup>     |
|                             |             |                              | 8 wt%             | 8 wt%                          |                                                                                      |                      | 8.9 (CO <sub>2</sub> /CH <sub>4</sub> )<br>8.4 (CO <sub>2</sub> /N <sub>2</sub> ) |                                              |                                             |                                             |                                               |                                                                                                 |                         |
| [emim][B(CN) <sub>4</sub> ] | poly(RTIL)  | ZIF-8                        | ~31 wt%           | 0                              | CO <sub>2</sub> , CH <sub>4</sub> ,<br>N <sub>2</sub>                                | 35 °C, 0.35 MPa      | 365                                                                               | 15.8                                         | 29.9                                        | -                                           | Direct physical blending                      | Providing additional transport paths                                                            | 2013 <sup>147</sup>     |
|                             |             |                              | ~31 wt%           | 25.8 wt%                       |                                                                                      |                      | 1062                                                                              |                                              |                                             |                                             |                                               |                                                                                                 |                         |
| Silica                      | PSF         | ZIF-8                        | 0                 | 0                              | CO <sub>2</sub> /CH <sub>4</sub> (50/50)                                             | 35 °C, 0.33 MPa      | 6.1                                                                               | 31                                           | -                                           | -                                           | <i>In situ</i> growth ZIF-8 on silica surface | Eliminating interfacial voids                                                                   | 2014 <sup>161</sup>     |
|                             |             |                              | 32 wt%            | NA                             |                                                                                      |                      | 24.4                                                                              |                                              |                                             |                                             |                                               |                                                                                                 |                         |
| [emim][Ac]                  | Chitosan    | ZIF-8                        | 5 wt%             | 0                              | CO <sub>2</sub> , N <sub>2</sub>                                                     | 50 °C, 0.2 MPa       | ~1300                                                                             | -                                            | 4.25                                        | -                                           | Direct physical blending                      | 1. Providing additional transport paths;<br>2. Increasing CO <sub>2</sub> diffusion selectivity | 2015 <sup>146</sup>     |
|                             |             |                              | 5 wt%             | 10 wt%                         |                                                                                      |                      | 5413                                                                              |                                              |                                             |                                             |                                               |                                                                                                 |                         |
|                             |             | HKUST-1                      | 5 wt%             | 0                              |                                                                                      |                      | ~1300                                                                             | -                                            | 4.25                                        | -                                           |                                               |                                                                                                 |                         |
|                             |             |                              | 5 wt%             | 5 wt%                          |                                                                                      |                      | 4754                                                                              |                                              |                                             |                                             |                                               |                                                                                                 |                         |
| CNTs                        | 6FDA-Durene | NH <sub>2</sub> -MIL-101(AI) | 5 wt%             | 0                              | CO <sub>2</sub> , CH <sub>4</sub>                                                    | 25 °C, 0.2 MPa       | ~780                                                                              | ~12                                          | -                                           | -                                           | MOF decorated on CNTs                         | Increasing CO <sub>2</sub> solubility                                                           | 2015 <sup>162</sup>     |
|                             |             |                              | 5 wt%             | 48.3 wt% of filler             |                                                                                      |                      | 818                                                                               |                                              |                                             |                                             |                                               |                                                                                                 |                         |
| GO                          | PSF         | ZIF-302                      | 1 wt%             | 0                              | CO <sub>2</sub> , N <sub>2</sub>                                                     | 25 °C, 0.1 MPa       | 8.5                                                                               | -                                            | 33                                          | -                                           | Direct physical blending                      | 1. Increasing CO <sub>2</sub> solubility;<br>2. Providing additional transport paths            | 2016 <sup>153</sup>     |
|                             |             |                              | 1 wt%             | 30 wt%                         |                                                                                      |                      | 13                                                                                |                                              |                                             |                                             |                                               |                                                                                                 |                         |
| GO                          | PSF         | ZIF-301                      | 1 wt%             | 0                              | CO <sub>2</sub> , N <sub>2</sub>                                                     | 25 °C, 0.1 MPa       | 8.5                                                                               | -                                            | 33                                          | -                                           | Direct physical blending                      | 1. Increasing CO <sub>2</sub> solubility;<br>2. Providing additional transport paths            | 2016 <sup>154</sup>     |
|                             |             |                              | 1 wt%             | 30 wt%                         |                                                                                      |                      | 25                                                                                |                                              |                                             |                                             |                                               |                                                                                                 |                         |
| CNTs                        | PSF         | ZIF-302                      | 8 wt%             | 12 wt%                         | CO <sub>2</sub> , N <sub>2</sub>                                                     | 25 °C, 0.2 MPa       | 18                                                                                | -                                            | 35                                          | -                                           | Direct physical blending                      | 1. Increasing CO <sub>2</sub> solubility<br>2. Improving filler distribution                    | 2016 <sup>156</sup>     |
| ZIF-8                       | PSF         | MIL-101(Cr)                  | 16 wt%            | 0                              | CO <sub>2</sub> /CH <sub>4</sub> (50/50),<br>CO <sub>2</sub> /N <sub>2</sub> (50/50) | 35 °C, 0.2 MPa       | 14                                                                                | 22                                           | -                                           | -                                           | Direct physical blending                      | Facilitating CO <sub>2</sub> transport                                                          | 2016 <sup>145</sup>     |
|                             |             |                              | 8 wt%             | 8 wt%                          |                                                                                      |                      | 14                                                                                |                                              |                                             |                                             |                                               |                                                                                                 |                         |
| GO                          | Pebax 2533  | ZIF-8                        | 6 wt%             | 0                              | CO <sub>2</sub> , N <sub>2</sub>                                                     | 25 °C, 0.1 MPa       | 120                                                                               | -                                            | 31                                          | -                                           | ZIF-8 grow on GO                              | 1. Providing additional transport paths;<br>2. Improving filler distribution                    | 2016 <sup>167</sup>     |
|                             |             |                              | 6 wt%             | 69.8 wt% of filler             |                                                                                      |                      | 249                                                                               |                                              |                                             |                                             |                                               |                                                                                                 |                         |
| Porous GO                   | Pebax 1657  | ZIF-8                        | 0.02 wt%          | 0                              | CO <sub>2</sub> /N <sub>2</sub> (50/50)                                              | 35 °C, 0.3 MPa       | 87                                                                                | -                                            | 50.5                                        | -                                           | ZIF-8 grow on GO                              | 1. Providing additional transport paths;<br>2. Improving filler distribution                    | 2017 <sup>168</sup>     |
|                             |             |                              | 0.02 wt%          | 28 wt% of filler               |                                                                                      |                      | 163                                                                               |                                              |                                             |                                             |                                               |                                                                                                 |                         |

Table S3. (continued)

| Filler                  | Polymer        | The third component | Loading of filler | Loading of the third component | Feed gas                                 | Operation conditions            | CO <sub>2</sub> permeability (Barrer) | CO <sub>2</sub> /CH <sub>4</sub> selectivity | CO <sub>2</sub> /N <sub>2</sub> selectivity | CO <sub>2</sub> /H <sub>2</sub> selectivity | Methodology                                                   | Role of the third component                                                                                       | Published year and ref. |                         |                |         |        |        |                                          |                                 |       |       |    |                                        |                                                               |                                                                                                                   |                     |         |                     |       |       |    |                                         |                         |                |         |        |        |                                          |                                 |       |       |    |                                        |                                                               |                                                                                                                   |                     |        |                     |       |      |    |                                         |                         |                |         |        |        |                                          |                                 |       |       |    |                                        |                                               |                                                                                                                   |                     |        |                     |       |      |    |                                         |                         |                |         |        |        |                                          |                                 |       |       |    |                                        |                                               |                                                                                                                   |                     |        |                    |       |      |    |                                        |                         |                |         |        |        |                                          |                                 |      |       |    |   |                                               |                                                                                                                   |                     |        |                  |      |      |    |   |                         |            |         |       |        |                                          |                |      |       |    |   |                                               |                                                                                                                   |                     |       |                  |      |      |    |   |                         |            |         |       |        |                                          |                |      |       |    |   |                          |                                                                                      |                     |       |        |      |     |    |   |      |            |         |       |        |                                          |                |      |    |    |   |                          |                                                                                      |                     |       |        |     |    |    |   |      |            |         |       |        |                                          |                |      |    |    |   |                          |                                                                              |                     |       |        |     |    |   |   |      |     |         |       |        |                                  |
|-------------------------|----------------|---------------------|-------------------|--------------------------------|------------------------------------------|---------------------------------|---------------------------------------|----------------------------------------------|---------------------------------------------|---------------------------------------------|---------------------------------------------------------------|-------------------------------------------------------------------------------------------------------------------|-------------------------|-------------------------|----------------|---------|--------|--------|------------------------------------------|---------------------------------|-------|-------|----|----------------------------------------|---------------------------------------------------------------|-------------------------------------------------------------------------------------------------------------------|---------------------|---------|---------------------|-------|-------|----|-----------------------------------------|-------------------------|----------------|---------|--------|--------|------------------------------------------|---------------------------------|-------|-------|----|----------------------------------------|---------------------------------------------------------------|-------------------------------------------------------------------------------------------------------------------|---------------------|--------|---------------------|-------|------|----|-----------------------------------------|-------------------------|----------------|---------|--------|--------|------------------------------------------|---------------------------------|-------|-------|----|----------------------------------------|-----------------------------------------------|-------------------------------------------------------------------------------------------------------------------|---------------------|--------|---------------------|-------|------|----|-----------------------------------------|-------------------------|----------------|---------|--------|--------|------------------------------------------|---------------------------------|-------|-------|----|----------------------------------------|-----------------------------------------------|-------------------------------------------------------------------------------------------------------------------|---------------------|--------|--------------------|-------|------|----|----------------------------------------|-------------------------|----------------|---------|--------|--------|------------------------------------------|---------------------------------|------|-------|----|---|-----------------------------------------------|-------------------------------------------------------------------------------------------------------------------|---------------------|--------|------------------|------|------|----|---|-------------------------|------------|---------|-------|--------|------------------------------------------|----------------|------|-------|----|---|-----------------------------------------------|-------------------------------------------------------------------------------------------------------------------|---------------------|-------|------------------|------|------|----|---|-------------------------|------------|---------|-------|--------|------------------------------------------|----------------|------|-------|----|---|--------------------------|--------------------------------------------------------------------------------------|---------------------|-------|--------|------|-----|----|---|------|------------|---------|-------|--------|------------------------------------------|----------------|------|----|----|---|--------------------------|--------------------------------------------------------------------------------------|---------------------|-------|--------|-----|----|----|---|------|------------|---------|-------|--------|------------------------------------------|----------------|------|----|----|---|--------------------------|------------------------------------------------------------------------------|---------------------|-------|--------|-----|----|---|---|------|-----|---------|-------|--------|----------------------------------|
| GO                      | Matrimid® 5218 | UiO-66              | 8 wt%             | 0                              | CO <sub>2</sub> /CH <sub>4</sub> (50/50) | 35 °C, 0.34 MPa                 | ~2.8                                  | ~16                                          | -                                           | -                                           | UiO-66 grow on GO                                             | 1. Providing additional transport paths;<br>2. Improving filler distribution                                      | 2017 <sup>169</sup>     |                         |                |         |        |        |                                          |                                 |       |       |    |                                        |                                                               |                                                                                                                   |                     |         |                     |       |       |    |                                         |                         |                |         |        |        |                                          |                                 |       |       |    |                                        |                                                               |                                                                                                                   |                     |        |                     |       |      |    |                                         |                         |                |         |        |        |                                          |                                 |       |       |    |                                        |                                               |                                                                                                                   |                     |        |                     |       |      |    |                                         |                         |                |         |        |        |                                          |                                 |       |       |    |                                        |                                               |                                                                                                                   |                     |        |                    |       |      |    |                                        |                         |                |         |        |        |                                          |                                 |      |       |    |   |                                               |                                                                                                                   |                     |        |                  |      |      |    |   |                         |            |         |       |        |                                          |                |      |       |    |   |                                               |                                                                                                                   |                     |       |                  |      |      |    |   |                         |            |         |       |        |                                          |                |      |       |    |   |                          |                                                                                      |                     |       |        |      |     |    |   |      |            |         |       |        |                                          |                |      |    |    |   |                          |                                                                                      |                     |       |        |     |    |    |   |      |            |         |       |        |                                          |                |      |    |    |   |                          |                                                                              |                     |       |        |     |    |   |   |      |     |         |       |        |                                  |
|                         |                |                     | 24 wt%            | 57 wt% of filler               |                                          |                                 | 21                                    | 51                                           | -                                           | -                                           |                                                               |                                                                                                                   |                         | Fumed silica            | PES            | Zn-MOF  | 15 wt% | 0      | CO <sub>2</sub> , CH <sub>4</sub>        | 25 °C, 0.35 MPa                 | 1.24  | 41.33 | -  | -                                      | Direct physical blending                                      | 1. Providing additional transport paths;<br>2. Increasing CO <sub>2</sub> solubility                              | 2017 <sup>152</sup> | 7.5 wt% | 7.5 wt%             | 30.92 | 48.31 | -  | -                                       | UiO-66-NH <sub>2</sub>  | PSF            | ZIF-8   | 40 wt% | 0      | CO <sub>2</sub> , N <sub>2</sub>         | 35 °C, 0.3 MPa                  | 48.2  | -     | 25 | -                                      | <i>In situ</i> growth ZIF-8 on UiO-66-NH <sub>2</sub> surface | Reducing effective pore size                                                                                      | 2017 <sup>163</sup> | 40 wt% | NA                  | 45.2  | -    | 39 | -                                       | ZIF-8                   | PBI            | ZIF-7   | 20 wt% | 0      | H <sub>2</sub> /CO <sub>2</sub> (50/50)  | 180 °C, 0.3 MPa                 | ~27.5 | -     | -  | 8.0                                    | Converting the surface of ZIF-8 to ZIF-7      | 1. Eliminating interfacial voids;<br>2. Reducing effective pore size                                              | 2017 <sup>164</sup> | 20 wt% | 10% based on ligand | ~34.7 | -    | -  | 10.1 (H <sub>2</sub> /CO <sub>2</sub> ) | ZIF-93                  | PBI            | ZIF-11  | 20 wt% | 0      | H <sub>2</sub> /CO <sub>2</sub> (50/50)  | 180 °C, 0.3 MPa                 | ~43.1 | -     | -  | 5.8 (H <sub>2</sub> /CO <sub>2</sub> ) | Converting the surface of ZIF-93 to ZIF-11    | 1. Eliminating interfacial voids;<br>2. Reducing effective pore size                                              | 2018 <sup>165</sup> | 20 wt% | 7% based on ligand | 26.88 | -    | -  | 7.7 (H <sub>2</sub> /CO <sub>2</sub> ) | GO                      | Matrimid® 5218 | ZIF-8   | 20 wt% | 0      | CO <sub>2</sub> , N <sub>2</sub>         | 30 °C, 0.1 MPa, humid condition | 134  | -     | 36 | - | <i>In-situ</i> growth of ZIF-8 on GO          | 1. Providing additional transport paths;<br>2. Improving filler distribution                                      | 2018 <sup>170</sup> | 20 wt% | 95 wt% of filler | 238  | -    | 65 | - | LDH                     | Pebax 1657 | ZIF-8   | 2 wt% | 0      | CO <sub>2</sub> /CH <sub>4</sub> (30/70) | 30 °C, 0.1 MPa | 615  | 28.2  | -  | - | <i>In-situ</i> growth of ZIF-8 on LDH surface | 1. Eliminating interfacial voids;<br>2. Providing additional transport paths;<br>3. Improving filler distribution | 2018 <sup>173</sup> | 2 wt% | 40 wt% of filler | 1307 | 31.6 | -  | - | <i>p</i> -Nitro aniline | PES        | ZIF-8   | 4 wt% | 0      | CO <sub>2</sub> , CH <sub>4</sub>        | 35 °C, 0.3 MPa | ~2.6 | ~48.3 | -  | - | Direct physical blending | Providing additional transport paths                                                 | 2018 <sup>148</sup> | 4 wt% | 10 wt% | ~4.5 | ~30 | -  | - | GO   | PSF        | ZIF-300 | 1 wt% | 0      | CO <sub>2</sub> , N <sub>2</sub>         | 25 °C, 0.1 MPa | 8.5  | -  | 33 | - | Direct physical blending | 1. Increasing CO <sub>2</sub> solubility;<br>2. Providing additional transport paths | 2018 <sup>155</sup> | 1 wt% | 30 wt% | 21  | -  | 61 | - | GO   | ODPA-TMPDA | ZIF-8   | 5 wt% | 0      | CO <sub>2</sub> /CH <sub>4</sub> (50/50) | 25 °C, 0.1 MPa | 97.5 | 44 | -  | - | Direct physical blending | Providing additional transport paths                                         | 2018 <sup>149</sup> | 5 wt% | 10 wt% | 145 | 43 | - | - | CNTs | PSF | ZIF-301 | 6 wt% | 18 wt% | CO <sub>2</sub> , N <sub>2</sub> |
| Fumed silica            | PES            | Zn-MOF              | 15 wt%            | 0                              | CO <sub>2</sub> , CH <sub>4</sub>        | 25 °C, 0.35 MPa                 | 1.24                                  | 41.33                                        | -                                           | -                                           | Direct physical blending                                      | 1. Providing additional transport paths;<br>2. Increasing CO <sub>2</sub> solubility                              | 2017 <sup>152</sup>     |                         |                |         |        |        |                                          |                                 |       |       |    |                                        |                                                               |                                                                                                                   |                     |         |                     |       |       |    |                                         |                         |                |         |        |        |                                          |                                 |       |       |    |                                        |                                                               |                                                                                                                   |                     |        |                     |       |      |    |                                         |                         |                |         |        |        |                                          |                                 |       |       |    |                                        |                                               |                                                                                                                   |                     |        |                     |       |      |    |                                         |                         |                |         |        |        |                                          |                                 |       |       |    |                                        |                                               |                                                                                                                   |                     |        |                    |       |      |    |                                        |                         |                |         |        |        |                                          |                                 |      |       |    |   |                                               |                                                                                                                   |                     |        |                  |      |      |    |   |                         |            |         |       |        |                                          |                |      |       |    |   |                                               |                                                                                                                   |                     |       |                  |      |      |    |   |                         |            |         |       |        |                                          |                |      |       |    |   |                          |                                                                                      |                     |       |        |      |     |    |   |      |            |         |       |        |                                          |                |      |    |    |   |                          |                                                                                      |                     |       |        |     |    |    |   |      |            |         |       |        |                                          |                |      |    |    |   |                          |                                                                              |                     |       |        |     |    |   |   |      |     |         |       |        |                                  |
|                         |                |                     | 7.5 wt%           | 7.5 wt%                        |                                          |                                 | 30.92                                 | 48.31                                        | -                                           | -                                           |                                                               |                                                                                                                   |                         | UiO-66-NH <sub>2</sub>  | PSF            | ZIF-8   | 40 wt% | 0      | CO <sub>2</sub> , N <sub>2</sub>         | 35 °C, 0.3 MPa                  | 48.2  | -     | 25 | -                                      | <i>In situ</i> growth ZIF-8 on UiO-66-NH <sub>2</sub> surface | Reducing effective pore size                                                                                      | 2017 <sup>163</sup> | 40 wt%  | NA                  | 45.2  | -     | 39 | -                                       | ZIF-8                   | PBI            | ZIF-7   | 20 wt% | 0      | H <sub>2</sub> /CO <sub>2</sub> (50/50)  | 180 °C, 0.3 MPa                 | ~27.5 | -     | -  | 8.0                                    | Converting the surface of ZIF-8 to ZIF-7                      | 1. Eliminating interfacial voids;<br>2. Reducing effective pore size                                              | 2017 <sup>164</sup> | 20 wt% | 10% based on ligand | ~34.7 | -    | -  | 10.1 (H <sub>2</sub> /CO <sub>2</sub> ) | ZIF-93                  | PBI            | ZIF-11  | 20 wt% | 0      | H <sub>2</sub> /CO <sub>2</sub> (50/50)  | 180 °C, 0.3 MPa                 | ~43.1 | -     | -  | 5.8 (H <sub>2</sub> /CO <sub>2</sub> ) | Converting the surface of ZIF-93 to ZIF-11    | 1. Eliminating interfacial voids;<br>2. Reducing effective pore size                                              | 2018 <sup>165</sup> | 20 wt% | 7% based on ligand  | 26.88 | -    | -  | 7.7 (H <sub>2</sub> /CO <sub>2</sub> )  | GO                      | Matrimid® 5218 | ZIF-8   | 20 wt% | 0      | CO <sub>2</sub> , N <sub>2</sub>         | 30 °C, 0.1 MPa, humid condition | 134   | -     | 36 | -                                      | <i>In-situ</i> growth of ZIF-8 on GO          | 1. Providing additional transport paths;<br>2. Improving filler distribution                                      | 2018 <sup>170</sup> | 20 wt% | 95 wt% of filler   | 238   | -    | 65 | -                                      | LDH                     | Pebax 1657     | ZIF-8   | 2 wt%  | 0      | CO <sub>2</sub> /CH <sub>4</sub> (30/70) | 30 °C, 0.1 MPa                  | 615  | 28.2  | -  | - | <i>In-situ</i> growth of ZIF-8 on LDH surface | 1. Eliminating interfacial voids;<br>2. Providing additional transport paths;<br>3. Improving filler distribution | 2018 <sup>173</sup> | 2 wt%  | 40 wt% of filler | 1307 | 31.6 | -  | - | <i>p</i> -Nitro aniline | PES        | ZIF-8   | 4 wt% | 0      | CO <sub>2</sub> , CH <sub>4</sub>        | 35 °C, 0.3 MPa | ~2.6 | ~48.3 | -  | - | Direct physical blending                      | Providing additional transport paths                                                                              | 2018 <sup>148</sup> | 4 wt% | 10 wt%           | ~4.5 | ~30  | -  | - | GO                      | PSF        | ZIF-300 | 1 wt% | 0      | CO <sub>2</sub> , N <sub>2</sub>         | 25 °C, 0.1 MPa | 8.5  | -     | 33 | - | Direct physical blending | 1. Increasing CO <sub>2</sub> solubility;<br>2. Providing additional transport paths | 2018 <sup>155</sup> | 1 wt% | 30 wt% | 21   | -   | 61 | - | GO   | ODPA-TMPDA | ZIF-8   | 5 wt% | 0      | CO <sub>2</sub> /CH <sub>4</sub> (50/50) | 25 °C, 0.1 MPa | 97.5 | 44 | -  | - | Direct physical blending | Providing additional transport paths                                                 | 2018 <sup>149</sup> | 5 wt% | 10 wt% | 145 | 43 | -  | - | CNTs | PSF        | ZIF-301 | 6 wt% | 18 wt% | CO <sub>2</sub> , N <sub>2</sub>         | 25 °C, 0.2 MPa | 19   | -  | 48 | - | Direct physical blending | 1. Increasing CO <sub>2</sub> solubility<br>2. Improving filler distribution | 2018 <sup>157</sup> |       |        |     |    |   |   |      |     |         |       |        |                                  |
| UiO-66-NH <sub>2</sub>  | PSF            | ZIF-8               | 40 wt%            | 0                              | CO <sub>2</sub> , N <sub>2</sub>         | 35 °C, 0.3 MPa                  | 48.2                                  | -                                            | 25                                          | -                                           | <i>In situ</i> growth ZIF-8 on UiO-66-NH <sub>2</sub> surface | Reducing effective pore size                                                                                      | 2017 <sup>163</sup>     |                         |                |         |        |        |                                          |                                 |       |       |    |                                        |                                                               |                                                                                                                   |                     |         |                     |       |       |    |                                         |                         |                |         |        |        |                                          |                                 |       |       |    |                                        |                                                               |                                                                                                                   |                     |        |                     |       |      |    |                                         |                         |                |         |        |        |                                          |                                 |       |       |    |                                        |                                               |                                                                                                                   |                     |        |                     |       |      |    |                                         |                         |                |         |        |        |                                          |                                 |       |       |    |                                        |                                               |                                                                                                                   |                     |        |                    |       |      |    |                                        |                         |                |         |        |        |                                          |                                 |      |       |    |   |                                               |                                                                                                                   |                     |        |                  |      |      |    |   |                         |            |         |       |        |                                          |                |      |       |    |   |                                               |                                                                                                                   |                     |       |                  |      |      |    |   |                         |            |         |       |        |                                          |                |      |       |    |   |                          |                                                                                      |                     |       |        |      |     |    |   |      |            |         |       |        |                                          |                |      |    |    |   |                          |                                                                                      |                     |       |        |     |    |    |   |      |            |         |       |        |                                          |                |      |    |    |   |                          |                                                                              |                     |       |        |     |    |   |   |      |     |         |       |        |                                  |
|                         |                |                     | 40 wt%            | NA                             |                                          |                                 | 45.2                                  | -                                            | 39                                          | -                                           |                                                               |                                                                                                                   |                         | ZIF-8                   | PBI            | ZIF-7   | 20 wt% | 0      | H <sub>2</sub> /CO <sub>2</sub> (50/50)  | 180 °C, 0.3 MPa                 | ~27.5 | -     | -  | 8.0                                    | Converting the surface of ZIF-8 to ZIF-7                      | 1. Eliminating interfacial voids;<br>2. Reducing effective pore size                                              | 2017 <sup>164</sup> | 20 wt%  | 10% based on ligand | ~34.7 | -     | -  | 10.1 (H <sub>2</sub> /CO <sub>2</sub> ) | ZIF-93                  | PBI            | ZIF-11  | 20 wt% | 0      | H <sub>2</sub> /CO <sub>2</sub> (50/50)  | 180 °C, 0.3 MPa                 | ~43.1 | -     | -  | 5.8 (H <sub>2</sub> /CO <sub>2</sub> ) | Converting the surface of ZIF-93 to ZIF-11                    | 1. Eliminating interfacial voids;<br>2. Reducing effective pore size                                              | 2018 <sup>165</sup> | 20 wt% | 7% based on ligand  | 26.88 | -    | -  | 7.7 (H <sub>2</sub> /CO <sub>2</sub> )  | GO                      | Matrimid® 5218 | ZIF-8   | 20 wt% | 0      | CO <sub>2</sub> , N <sub>2</sub>         | 30 °C, 0.1 MPa, humid condition | 134   | -     | 36 | -                                      | <i>In-situ</i> growth of ZIF-8 on GO          | 1. Providing additional transport paths;<br>2. Improving filler distribution                                      | 2018 <sup>170</sup> | 20 wt% | 95 wt% of filler    | 238   | -    | 65 | -                                       | LDH                     | Pebax 1657     | ZIF-8   | 2 wt%  | 0      | CO <sub>2</sub> /CH <sub>4</sub> (30/70) | 30 °C, 0.1 MPa                  | 615   | 28.2  | -  | -                                      | <i>In-situ</i> growth of ZIF-8 on LDH surface | 1. Eliminating interfacial voids;<br>2. Providing additional transport paths;<br>3. Improving filler distribution | 2018 <sup>173</sup> | 2 wt%  | 40 wt% of filler   | 1307  | 31.6 | -  | -                                      | <i>p</i> -Nitro aniline | PES            | ZIF-8   | 4 wt%  | 0      | CO <sub>2</sub> , CH <sub>4</sub>        | 35 °C, 0.3 MPa                  | ~2.6 | ~48.3 | -  | - | Direct physical blending                      | Providing additional transport paths                                                                              | 2018 <sup>148</sup> | 4 wt%  | 10 wt%           | ~4.5 | ~30  | -  | - | GO                      | PSF        | ZIF-300 | 1 wt% | 0      | CO <sub>2</sub> , N <sub>2</sub>         | 25 °C, 0.1 MPa | 8.5  | -     | 33 | - | Direct physical blending                      | 1. Increasing CO <sub>2</sub> solubility;<br>2. Providing additional transport paths                              | 2018 <sup>155</sup> | 1 wt% | 30 wt%           | 21   | -    | 61 | - | GO                      | ODPA-TMPDA | ZIF-8   | 5 wt% | 0      | CO <sub>2</sub> /CH <sub>4</sub> (50/50) | 25 °C, 0.1 MPa | 97.5 | 44    | -  | - | Direct physical blending | Providing additional transport paths                                                 | 2018 <sup>149</sup> | 5 wt% | 10 wt% | 145  | 43  | -  | - | CNTs | PSF        | ZIF-301 | 6 wt% | 18 wt% | CO <sub>2</sub> , N <sub>2</sub>         | 25 °C, 0.2 MPa | 19   | -  | 48 | - | Direct physical blending | 1. Increasing CO <sub>2</sub> solubility<br>2. Improving filler distribution         | 2018 <sup>157</sup> |       |        |     |    |    |   |      |            |         |       |        |                                          |                |      |    |    |   |                          |                                                                              |                     |       |        |     |    |   |   |      |     |         |       |        |                                  |
| ZIF-8                   | PBI            | ZIF-7               | 20 wt%            | 0                              | H <sub>2</sub> /CO <sub>2</sub> (50/50)  | 180 °C, 0.3 MPa                 | ~27.5                                 | -                                            | -                                           | 8.0                                         | Converting the surface of ZIF-8 to ZIF-7                      | 1. Eliminating interfacial voids;<br>2. Reducing effective pore size                                              | 2017 <sup>164</sup>     |                         |                |         |        |        |                                          |                                 |       |       |    |                                        |                                                               |                                                                                                                   |                     |         |                     |       |       |    |                                         |                         |                |         |        |        |                                          |                                 |       |       |    |                                        |                                                               |                                                                                                                   |                     |        |                     |       |      |    |                                         |                         |                |         |        |        |                                          |                                 |       |       |    |                                        |                                               |                                                                                                                   |                     |        |                     |       |      |    |                                         |                         |                |         |        |        |                                          |                                 |       |       |    |                                        |                                               |                                                                                                                   |                     |        |                    |       |      |    |                                        |                         |                |         |        |        |                                          |                                 |      |       |    |   |                                               |                                                                                                                   |                     |        |                  |      |      |    |   |                         |            |         |       |        |                                          |                |      |       |    |   |                                               |                                                                                                                   |                     |       |                  |      |      |    |   |                         |            |         |       |        |                                          |                |      |       |    |   |                          |                                                                                      |                     |       |        |      |     |    |   |      |            |         |       |        |                                          |                |      |    |    |   |                          |                                                                                      |                     |       |        |     |    |    |   |      |            |         |       |        |                                          |                |      |    |    |   |                          |                                                                              |                     |       |        |     |    |   |   |      |     |         |       |        |                                  |
|                         |                |                     | 20 wt%            | 10% based on ligand            |                                          |                                 | ~34.7                                 | -                                            | -                                           | 10.1 (H <sub>2</sub> /CO <sub>2</sub> )     |                                                               |                                                                                                                   |                         | ZIF-93                  | PBI            | ZIF-11  | 20 wt% | 0      | H <sub>2</sub> /CO <sub>2</sub> (50/50)  | 180 °C, 0.3 MPa                 | ~43.1 | -     | -  | 5.8 (H <sub>2</sub> /CO <sub>2</sub> ) | Converting the surface of ZIF-93 to ZIF-11                    | 1. Eliminating interfacial voids;<br>2. Reducing effective pore size                                              | 2018 <sup>165</sup> | 20 wt%  | 7% based on ligand  | 26.88 | -     | -  | 7.7 (H <sub>2</sub> /CO <sub>2</sub> )  | GO                      | Matrimid® 5218 | ZIF-8   | 20 wt% | 0      | CO <sub>2</sub> , N <sub>2</sub>         | 30 °C, 0.1 MPa, humid condition | 134   | -     | 36 | -                                      | <i>In-situ</i> growth of ZIF-8 on GO                          | 1. Providing additional transport paths;<br>2. Improving filler distribution                                      | 2018 <sup>170</sup> | 20 wt% | 95 wt% of filler    | 238   | -    | 65 | -                                       | LDH                     | Pebax 1657     | ZIF-8   | 2 wt%  | 0      | CO <sub>2</sub> /CH <sub>4</sub> (30/70) | 30 °C, 0.1 MPa                  | 615   | 28.2  | -  | -                                      | <i>In-situ</i> growth of ZIF-8 on LDH surface | 1. Eliminating interfacial voids;<br>2. Providing additional transport paths;<br>3. Improving filler distribution | 2018 <sup>173</sup> | 2 wt%  | 40 wt% of filler    | 1307  | 31.6 | -  | -                                       | <i>p</i> -Nitro aniline | PES            | ZIF-8   | 4 wt%  | 0      | CO <sub>2</sub> , CH <sub>4</sub>        | 35 °C, 0.3 MPa                  | ~2.6  | ~48.3 | -  | -                                      | Direct physical blending                      | Providing additional transport paths                                                                              | 2018 <sup>148</sup> | 4 wt%  | 10 wt%             | ~4.5  | ~30  | -  | -                                      | GO                      | PSF            | ZIF-300 | 1 wt%  | 0      | CO <sub>2</sub> , N <sub>2</sub>         | 25 °C, 0.1 MPa                  | 8.5  | -     | 33 | - | Direct physical blending                      | 1. Increasing CO <sub>2</sub> solubility;<br>2. Providing additional transport paths                              | 2018 <sup>155</sup> | 1 wt%  | 30 wt%           | 21   | -    | 61 | - | GO                      | ODPA-TMPDA | ZIF-8   | 5 wt% | 0      | CO <sub>2</sub> /CH <sub>4</sub> (50/50) | 25 °C, 0.1 MPa | 97.5 | 44    | -  | - | Direct physical blending                      | Providing additional transport paths                                                                              | 2018 <sup>149</sup> | 5 wt% | 10 wt%           | 145  | 43   | -  | - | CNTs                    | PSF        | ZIF-301 | 6 wt% | 18 wt% | CO <sub>2</sub> , N <sub>2</sub>         | 25 °C, 0.2 MPa | 19   | -     | 48 | - | Direct physical blending | 1. Increasing CO <sub>2</sub> solubility<br>2. Improving filler distribution         | 2018 <sup>157</sup> |       |        |      |     |    |   |      |            |         |       |        |                                          |                |      |    |    |   |                          |                                                                                      |                     |       |        |     |    |    |   |      |            |         |       |        |                                          |                |      |    |    |   |                          |                                                                              |                     |       |        |     |    |   |   |      |     |         |       |        |                                  |
| ZIF-93                  | PBI            | ZIF-11              | 20 wt%            | 0                              | H <sub>2</sub> /CO <sub>2</sub> (50/50)  | 180 °C, 0.3 MPa                 | ~43.1                                 | -                                            | -                                           | 5.8 (H <sub>2</sub> /CO <sub>2</sub> )      | Converting the surface of ZIF-93 to ZIF-11                    | 1. Eliminating interfacial voids;<br>2. Reducing effective pore size                                              | 2018 <sup>165</sup>     |                         |                |         |        |        |                                          |                                 |       |       |    |                                        |                                                               |                                                                                                                   |                     |         |                     |       |       |    |                                         |                         |                |         |        |        |                                          |                                 |       |       |    |                                        |                                                               |                                                                                                                   |                     |        |                     |       |      |    |                                         |                         |                |         |        |        |                                          |                                 |       |       |    |                                        |                                               |                                                                                                                   |                     |        |                     |       |      |    |                                         |                         |                |         |        |        |                                          |                                 |       |       |    |                                        |                                               |                                                                                                                   |                     |        |                    |       |      |    |                                        |                         |                |         |        |        |                                          |                                 |      |       |    |   |                                               |                                                                                                                   |                     |        |                  |      |      |    |   |                         |            |         |       |        |                                          |                |      |       |    |   |                                               |                                                                                                                   |                     |       |                  |      |      |    |   |                         |            |         |       |        |                                          |                |      |       |    |   |                          |                                                                                      |                     |       |        |      |     |    |   |      |            |         |       |        |                                          |                |      |    |    |   |                          |                                                                                      |                     |       |        |     |    |    |   |      |            |         |       |        |                                          |                |      |    |    |   |                          |                                                                              |                     |       |        |     |    |   |   |      |     |         |       |        |                                  |
|                         |                |                     | 20 wt%            | 7% based on ligand             |                                          |                                 | 26.88                                 | -                                            | -                                           | 7.7 (H <sub>2</sub> /CO <sub>2</sub> )      |                                                               |                                                                                                                   |                         | GO                      | Matrimid® 5218 | ZIF-8   | 20 wt% | 0      | CO <sub>2</sub> , N <sub>2</sub>         | 30 °C, 0.1 MPa, humid condition | 134   | -     | 36 | -                                      | <i>In-situ</i> growth of ZIF-8 on GO                          | 1. Providing additional transport paths;<br>2. Improving filler distribution                                      | 2018 <sup>170</sup> | 20 wt%  | 95 wt% of filler    | 238   | -     | 65 | -                                       | LDH                     | Pebax 1657     | ZIF-8   | 2 wt%  | 0      | CO <sub>2</sub> /CH <sub>4</sub> (30/70) | 30 °C, 0.1 MPa                  | 615   | 28.2  | -  | -                                      | <i>In-situ</i> growth of ZIF-8 on LDH surface                 | 1. Eliminating interfacial voids;<br>2. Providing additional transport paths;<br>3. Improving filler distribution | 2018 <sup>173</sup> | 2 wt%  | 40 wt% of filler    | 1307  | 31.6 | -  | -                                       | <i>p</i> -Nitro aniline | PES            | ZIF-8   | 4 wt%  | 0      | CO <sub>2</sub> , CH <sub>4</sub>        | 35 °C, 0.3 MPa                  | ~2.6  | ~48.3 | -  | -                                      | Direct physical blending                      | Providing additional transport paths                                                                              | 2018 <sup>148</sup> | 4 wt%  | 10 wt%              | ~4.5  | ~30  | -  | -                                       | GO                      | PSF            | ZIF-300 | 1 wt%  | 0      | CO <sub>2</sub> , N <sub>2</sub>         | 25 °C, 0.1 MPa                  | 8.5   | -     | 33 | -                                      | Direct physical blending                      | 1. Increasing CO <sub>2</sub> solubility;<br>2. Providing additional transport paths                              | 2018 <sup>155</sup> | 1 wt%  | 30 wt%             | 21    | -    | 61 | -                                      | GO                      | ODPA-TMPDA     | ZIF-8   | 5 wt%  | 0      | CO <sub>2</sub> /CH <sub>4</sub> (50/50) | 25 °C, 0.1 MPa                  | 97.5 | 44    | -  | - | Direct physical blending                      | Providing additional transport paths                                                                              | 2018 <sup>149</sup> | 5 wt%  | 10 wt%           | 145  | 43   | -  | - | CNTs                    | PSF        | ZIF-301 | 6 wt% | 18 wt% | CO <sub>2</sub> , N <sub>2</sub>         | 25 °C, 0.2 MPa | 19   | -     | 48 | - | Direct physical blending                      | 1. Increasing CO <sub>2</sub> solubility<br>2. Improving filler distribution                                      | 2018 <sup>157</sup> |       |                  |      |      |    |   |                         |            |         |       |        |                                          |                |      |       |    |   |                          |                                                                                      |                     |       |        |      |     |    |   |      |            |         |       |        |                                          |                |      |    |    |   |                          |                                                                                      |                     |       |        |     |    |    |   |      |            |         |       |        |                                          |                |      |    |    |   |                          |                                                                              |                     |       |        |     |    |   |   |      |     |         |       |        |                                  |
| GO                      | Matrimid® 5218 | ZIF-8               | 20 wt%            | 0                              | CO <sub>2</sub> , N <sub>2</sub>         | 30 °C, 0.1 MPa, humid condition | 134                                   | -                                            | 36                                          | -                                           | <i>In-situ</i> growth of ZIF-8 on GO                          | 1. Providing additional transport paths;<br>2. Improving filler distribution                                      | 2018 <sup>170</sup>     |                         |                |         |        |        |                                          |                                 |       |       |    |                                        |                                                               |                                                                                                                   |                     |         |                     |       |       |    |                                         |                         |                |         |        |        |                                          |                                 |       |       |    |                                        |                                                               |                                                                                                                   |                     |        |                     |       |      |    |                                         |                         |                |         |        |        |                                          |                                 |       |       |    |                                        |                                               |                                                                                                                   |                     |        |                     |       |      |    |                                         |                         |                |         |        |        |                                          |                                 |       |       |    |                                        |                                               |                                                                                                                   |                     |        |                    |       |      |    |                                        |                         |                |         |        |        |                                          |                                 |      |       |    |   |                                               |                                                                                                                   |                     |        |                  |      |      |    |   |                         |            |         |       |        |                                          |                |      |       |    |   |                                               |                                                                                                                   |                     |       |                  |      |      |    |   |                         |            |         |       |        |                                          |                |      |       |    |   |                          |                                                                                      |                     |       |        |      |     |    |   |      |            |         |       |        |                                          |                |      |    |    |   |                          |                                                                                      |                     |       |        |     |    |    |   |      |            |         |       |        |                                          |                |      |    |    |   |                          |                                                                              |                     |       |        |     |    |   |   |      |     |         |       |        |                                  |
|                         |                |                     | 20 wt%            | 95 wt% of filler               |                                          |                                 | 238                                   | -                                            | 65                                          | -                                           |                                                               |                                                                                                                   |                         | LDH                     | Pebax 1657     | ZIF-8   | 2 wt%  | 0      | CO <sub>2</sub> /CH <sub>4</sub> (30/70) | 30 °C, 0.1 MPa                  | 615   | 28.2  | -  | -                                      | <i>In-situ</i> growth of ZIF-8 on LDH surface                 | 1. Eliminating interfacial voids;<br>2. Providing additional transport paths;<br>3. Improving filler distribution | 2018 <sup>173</sup> | 2 wt%   | 40 wt% of filler    | 1307  | 31.6  | -  | -                                       | <i>p</i> -Nitro aniline | PES            | ZIF-8   | 4 wt%  | 0      | CO <sub>2</sub> , CH <sub>4</sub>        | 35 °C, 0.3 MPa                  | ~2.6  | ~48.3 | -  | -                                      | Direct physical blending                                      | Providing additional transport paths                                                                              | 2018 <sup>148</sup> | 4 wt%  | 10 wt%              | ~4.5  | ~30  | -  | -                                       | GO                      | PSF            | ZIF-300 | 1 wt%  | 0      | CO <sub>2</sub> , N <sub>2</sub>         | 25 °C, 0.1 MPa                  | 8.5   | -     | 33 | -                                      | Direct physical blending                      | 1. Increasing CO <sub>2</sub> solubility;<br>2. Providing additional transport paths                              | 2018 <sup>155</sup> | 1 wt%  | 30 wt%              | 21    | -    | 61 | -                                       | GO                      | ODPA-TMPDA     | ZIF-8   | 5 wt%  | 0      | CO <sub>2</sub> /CH <sub>4</sub> (50/50) | 25 °C, 0.1 MPa                  | 97.5  | 44    | -  | -                                      | Direct physical blending                      | Providing additional transport paths                                                                              | 2018 <sup>149</sup> | 5 wt%  | 10 wt%             | 145   | 43   | -  | -                                      | CNTs                    | PSF            | ZIF-301 | 6 wt%  | 18 wt% | CO <sub>2</sub> , N <sub>2</sub>         | 25 °C, 0.2 MPa                  | 19   | -     | 48 | - | Direct physical blending                      | 1. Increasing CO <sub>2</sub> solubility<br>2. Improving filler distribution                                      | 2018 <sup>157</sup> |        |                  |      |      |    |   |                         |            |         |       |        |                                          |                |      |       |    |   |                                               |                                                                                                                   |                     |       |                  |      |      |    |   |                         |            |         |       |        |                                          |                |      |       |    |   |                          |                                                                                      |                     |       |        |      |     |    |   |      |            |         |       |        |                                          |                |      |    |    |   |                          |                                                                                      |                     |       |        |     |    |    |   |      |            |         |       |        |                                          |                |      |    |    |   |                          |                                                                              |                     |       |        |     |    |   |   |      |     |         |       |        |                                  |
| LDH                     | Pebax 1657     | ZIF-8               | 2 wt%             | 0                              | CO <sub>2</sub> /CH <sub>4</sub> (30/70) | 30 °C, 0.1 MPa                  | 615                                   | 28.2                                         | -                                           | -                                           | <i>In-situ</i> growth of ZIF-8 on LDH surface                 | 1. Eliminating interfacial voids;<br>2. Providing additional transport paths;<br>3. Improving filler distribution | 2018 <sup>173</sup>     |                         |                |         |        |        |                                          |                                 |       |       |    |                                        |                                                               |                                                                                                                   |                     |         |                     |       |       |    |                                         |                         |                |         |        |        |                                          |                                 |       |       |    |                                        |                                                               |                                                                                                                   |                     |        |                     |       |      |    |                                         |                         |                |         |        |        |                                          |                                 |       |       |    |                                        |                                               |                                                                                                                   |                     |        |                     |       |      |    |                                         |                         |                |         |        |        |                                          |                                 |       |       |    |                                        |                                               |                                                                                                                   |                     |        |                    |       |      |    |                                        |                         |                |         |        |        |                                          |                                 |      |       |    |   |                                               |                                                                                                                   |                     |        |                  |      |      |    |   |                         |            |         |       |        |                                          |                |      |       |    |   |                                               |                                                                                                                   |                     |       |                  |      |      |    |   |                         |            |         |       |        |                                          |                |      |       |    |   |                          |                                                                                      |                     |       |        |      |     |    |   |      |            |         |       |        |                                          |                |      |    |    |   |                          |                                                                                      |                     |       |        |     |    |    |   |      |            |         |       |        |                                          |                |      |    |    |   |                          |                                                                              |                     |       |        |     |    |   |   |      |     |         |       |        |                                  |
|                         |                |                     | 2 wt%             | 40 wt% of filler               |                                          |                                 | 1307                                  | 31.6                                         | -                                           | -                                           |                                                               |                                                                                                                   |                         | <i>p</i> -Nitro aniline | PES            | ZIF-8   | 4 wt%  | 0      | CO <sub>2</sub> , CH <sub>4</sub>        | 35 °C, 0.3 MPa                  | ~2.6  | ~48.3 | -  | -                                      | Direct physical blending                                      | Providing additional transport paths                                                                              | 2018 <sup>148</sup> | 4 wt%   | 10 wt%              | ~4.5  | ~30   | -  | -                                       | GO                      | PSF            | ZIF-300 | 1 wt%  | 0      | CO <sub>2</sub> , N <sub>2</sub>         | 25 °C, 0.1 MPa                  | 8.5   | -     | 33 | -                                      | Direct physical blending                                      | 1. Increasing CO <sub>2</sub> solubility;<br>2. Providing additional transport paths                              | 2018 <sup>155</sup> | 1 wt%  | 30 wt%              | 21    | -    | 61 | -                                       | GO                      | ODPA-TMPDA     | ZIF-8   | 5 wt%  | 0      | CO <sub>2</sub> /CH <sub>4</sub> (50/50) | 25 °C, 0.1 MPa                  | 97.5  | 44    | -  | -                                      | Direct physical blending                      | Providing additional transport paths                                                                              | 2018 <sup>149</sup> | 5 wt%  | 10 wt%              | 145   | 43   | -  | -                                       | CNTs                    | PSF            | ZIF-301 | 6 wt%  | 18 wt% | CO <sub>2</sub> , N <sub>2</sub>         | 25 °C, 0.2 MPa                  | 19    | -     | 48 | -                                      | Direct physical blending                      | 1. Increasing CO <sub>2</sub> solubility<br>2. Improving filler distribution                                      | 2018 <sup>157</sup> |        |                    |       |      |    |                                        |                         |                |         |        |        |                                          |                                 |      |       |    |   |                                               |                                                                                                                   |                     |        |                  |      |      |    |   |                         |            |         |       |        |                                          |                |      |       |    |   |                                               |                                                                                                                   |                     |       |                  |      |      |    |   |                         |            |         |       |        |                                          |                |      |       |    |   |                          |                                                                                      |                     |       |        |      |     |    |   |      |            |         |       |        |                                          |                |      |    |    |   |                          |                                                                                      |                     |       |        |     |    |    |   |      |            |         |       |        |                                          |                |      |    |    |   |                          |                                                                              |                     |       |        |     |    |   |   |      |     |         |       |        |                                  |
| <i>p</i> -Nitro aniline | PES            | ZIF-8               | 4 wt%             | 0                              | CO <sub>2</sub> , CH <sub>4</sub>        | 35 °C, 0.3 MPa                  | ~2.6                                  | ~48.3                                        | -                                           | -                                           | Direct physical blending                                      | Providing additional transport paths                                                                              | 2018 <sup>148</sup>     |                         |                |         |        |        |                                          |                                 |       |       |    |                                        |                                                               |                                                                                                                   |                     |         |                     |       |       |    |                                         |                         |                |         |        |        |                                          |                                 |       |       |    |                                        |                                                               |                                                                                                                   |                     |        |                     |       |      |    |                                         |                         |                |         |        |        |                                          |                                 |       |       |    |                                        |                                               |                                                                                                                   |                     |        |                     |       |      |    |                                         |                         |                |         |        |        |                                          |                                 |       |       |    |                                        |                                               |                                                                                                                   |                     |        |                    |       |      |    |                                        |                         |                |         |        |        |                                          |                                 |      |       |    |   |                                               |                                                                                                                   |                     |        |                  |      |      |    |   |                         |            |         |       |        |                                          |                |      |       |    |   |                                               |                                                                                                                   |                     |       |                  |      |      |    |   |                         |            |         |       |        |                                          |                |      |       |    |   |                          |                                                                                      |                     |       |        |      |     |    |   |      |            |         |       |        |                                          |                |      |    |    |   |                          |                                                                                      |                     |       |        |     |    |    |   |      |            |         |       |        |                                          |                |      |    |    |   |                          |                                                                              |                     |       |        |     |    |   |   |      |     |         |       |        |                                  |
|                         |                |                     | 4 wt%             | 10 wt%                         |                                          |                                 | ~4.5                                  | ~30                                          | -                                           | -                                           |                                                               |                                                                                                                   |                         | GO                      | PSF            | ZIF-300 | 1 wt%  | 0      | CO <sub>2</sub> , N <sub>2</sub>         | 25 °C, 0.1 MPa                  | 8.5   | -     | 33 | -                                      | Direct physical blending                                      | 1. Increasing CO <sub>2</sub> solubility;<br>2. Providing additional transport paths                              | 2018 <sup>155</sup> | 1 wt%   | 30 wt%              | 21    | -     | 61 | -                                       | GO                      | ODPA-TMPDA     | ZIF-8   | 5 wt%  | 0      | CO <sub>2</sub> /CH <sub>4</sub> (50/50) | 25 °C, 0.1 MPa                  | 97.5  | 44    | -  | -                                      | Direct physical blending                                      | Providing additional transport paths                                                                              | 2018 <sup>149</sup> | 5 wt%  | 10 wt%              | 145   | 43   | -  | -                                       | CNTs                    | PSF            | ZIF-301 | 6 wt%  | 18 wt% | CO <sub>2</sub> , N <sub>2</sub>         | 25 °C, 0.2 MPa                  | 19    | -     | 48 | -                                      | Direct physical blending                      | 1. Increasing CO <sub>2</sub> solubility<br>2. Improving filler distribution                                      | 2018 <sup>157</sup> |        |                     |       |      |    |                                         |                         |                |         |        |        |                                          |                                 |       |       |    |                                        |                                               |                                                                                                                   |                     |        |                    |       |      |    |                                        |                         |                |         |        |        |                                          |                                 |      |       |    |   |                                               |                                                                                                                   |                     |        |                  |      |      |    |   |                         |            |         |       |        |                                          |                |      |       |    |   |                                               |                                                                                                                   |                     |       |                  |      |      |    |   |                         |            |         |       |        |                                          |                |      |       |    |   |                          |                                                                                      |                     |       |        |      |     |    |   |      |            |         |       |        |                                          |                |      |    |    |   |                          |                                                                                      |                     |       |        |     |    |    |   |      |            |         |       |        |                                          |                |      |    |    |   |                          |                                                                              |                     |       |        |     |    |   |   |      |     |         |       |        |                                  |
| GO                      | PSF            | ZIF-300             | 1 wt%             | 0                              | CO <sub>2</sub> , N <sub>2</sub>         | 25 °C, 0.1 MPa                  | 8.5                                   | -                                            | 33                                          | -                                           | Direct physical blending                                      | 1. Increasing CO <sub>2</sub> solubility;<br>2. Providing additional transport paths                              | 2018 <sup>155</sup>     |                         |                |         |        |        |                                          |                                 |       |       |    |                                        |                                                               |                                                                                                                   |                     |         |                     |       |       |    |                                         |                         |                |         |        |        |                                          |                                 |       |       |    |                                        |                                                               |                                                                                                                   |                     |        |                     |       |      |    |                                         |                         |                |         |        |        |                                          |                                 |       |       |    |                                        |                                               |                                                                                                                   |                     |        |                     |       |      |    |                                         |                         |                |         |        |        |                                          |                                 |       |       |    |                                        |                                               |                                                                                                                   |                     |        |                    |       |      |    |                                        |                         |                |         |        |        |                                          |                                 |      |       |    |   |                                               |                                                                                                                   |                     |        |                  |      |      |    |   |                         |            |         |       |        |                                          |                |      |       |    |   |                                               |                                                                                                                   |                     |       |                  |      |      |    |   |                         |            |         |       |        |                                          |                |      |       |    |   |                          |                                                                                      |                     |       |        |      |     |    |   |      |            |         |       |        |                                          |                |      |    |    |   |                          |                                                                                      |                     |       |        |     |    |    |   |      |            |         |       |        |                                          |                |      |    |    |   |                          |                                                                              |                     |       |        |     |    |   |   |      |     |         |       |        |                                  |
|                         |                |                     | 1 wt%             | 30 wt%                         |                                          |                                 | 21                                    | -                                            | 61                                          | -                                           |                                                               |                                                                                                                   |                         | GO                      | ODPA-TMPDA     | ZIF-8   | 5 wt%  | 0      | CO <sub>2</sub> /CH <sub>4</sub> (50/50) | 25 °C, 0.1 MPa                  | 97.5  | 44    | -  | -                                      | Direct physical blending                                      | Providing additional transport paths                                                                              | 2018 <sup>149</sup> | 5 wt%   | 10 wt%              | 145   | 43    | -  | -                                       | CNTs                    | PSF            | ZIF-301 | 6 wt%  | 18 wt% | CO <sub>2</sub> , N <sub>2</sub>         | 25 °C, 0.2 MPa                  | 19    | -     | 48 | -                                      | Direct physical blending                                      | 1. Increasing CO <sub>2</sub> solubility<br>2. Improving filler distribution                                      | 2018 <sup>157</sup> |        |                     |       |      |    |                                         |                         |                |         |        |        |                                          |                                 |       |       |    |                                        |                                               |                                                                                                                   |                     |        |                     |       |      |    |                                         |                         |                |         |        |        |                                          |                                 |       |       |    |                                        |                                               |                                                                                                                   |                     |        |                    |       |      |    |                                        |                         |                |         |        |        |                                          |                                 |      |       |    |   |                                               |                                                                                                                   |                     |        |                  |      |      |    |   |                         |            |         |       |        |                                          |                |      |       |    |   |                                               |                                                                                                                   |                     |       |                  |      |      |    |   |                         |            |         |       |        |                                          |                |      |       |    |   |                          |                                                                                      |                     |       |        |      |     |    |   |      |            |         |       |        |                                          |                |      |    |    |   |                          |                                                                                      |                     |       |        |     |    |    |   |      |            |         |       |        |                                          |                |      |    |    |   |                          |                                                                              |                     |       |        |     |    |   |   |      |     |         |       |        |                                  |
| GO                      | ODPA-TMPDA     | ZIF-8               | 5 wt%             | 0                              | CO <sub>2</sub> /CH <sub>4</sub> (50/50) | 25 °C, 0.1 MPa                  | 97.5                                  | 44                                           | -                                           | -                                           | Direct physical blending                                      | Providing additional transport paths                                                                              | 2018 <sup>149</sup>     |                         |                |         |        |        |                                          |                                 |       |       |    |                                        |                                                               |                                                                                                                   |                     |         |                     |       |       |    |                                         |                         |                |         |        |        |                                          |                                 |       |       |    |                                        |                                                               |                                                                                                                   |                     |        |                     |       |      |    |                                         |                         |                |         |        |        |                                          |                                 |       |       |    |                                        |                                               |                                                                                                                   |                     |        |                     |       |      |    |                                         |                         |                |         |        |        |                                          |                                 |       |       |    |                                        |                                               |                                                                                                                   |                     |        |                    |       |      |    |                                        |                         |                |         |        |        |                                          |                                 |      |       |    |   |                                               |                                                                                                                   |                     |        |                  |      |      |    |   |                         |            |         |       |        |                                          |                |      |       |    |   |                                               |                                                                                                                   |                     |       |                  |      |      |    |   |                         |            |         |       |        |                                          |                |      |       |    |   |                          |                                                                                      |                     |       |        |      |     |    |   |      |            |         |       |        |                                          |                |      |    |    |   |                          |                                                                                      |                     |       |        |     |    |    |   |      |            |         |       |        |                                          |                |      |    |    |   |                          |                                                                              |                     |       |        |     |    |   |   |      |     |         |       |        |                                  |
|                         |                |                     | 5 wt%             | 10 wt%                         |                                          |                                 | 145                                   | 43                                           | -                                           | -                                           |                                                               |                                                                                                                   |                         | CNTs                    | PSF            | ZIF-301 | 6 wt%  | 18 wt% | CO <sub>2</sub> , N <sub>2</sub>         | 25 °C, 0.2 MPa                  | 19    | -     | 48 | -                                      | Direct physical blending                                      | 1. Increasing CO <sub>2</sub> solubility<br>2. Improving filler distribution                                      | 2018 <sup>157</sup> |         |                     |       |       |    |                                         |                         |                |         |        |        |                                          |                                 |       |       |    |                                        |                                                               |                                                                                                                   |                     |        |                     |       |      |    |                                         |                         |                |         |        |        |                                          |                                 |       |       |    |                                        |                                               |                                                                                                                   |                     |        |                     |       |      |    |                                         |                         |                |         |        |        |                                          |                                 |       |       |    |                                        |                                               |                                                                                                                   |                     |        |                    |       |      |    |                                        |                         |                |         |        |        |                                          |                                 |      |       |    |   |                                               |                                                                                                                   |                     |        |                  |      |      |    |   |                         |            |         |       |        |                                          |                |      |       |    |   |                                               |                                                                                                                   |                     |       |                  |      |      |    |   |                         |            |         |       |        |                                          |                |      |       |    |   |                          |                                                                                      |                     |       |        |      |     |    |   |      |            |         |       |        |                                          |                |      |    |    |   |                          |                                                                                      |                     |       |        |     |    |    |   |      |            |         |       |        |                                          |                |      |    |    |   |                          |                                                                              |                     |       |        |     |    |   |   |      |     |         |       |        |                                  |
| CNTs                    | PSF            | ZIF-301             | 6 wt%             | 18 wt%                         | CO <sub>2</sub> , N <sub>2</sub>         | 25 °C, 0.2 MPa                  | 19                                    | -                                            | 48                                          | -                                           | Direct physical blending                                      | 1. Increasing CO <sub>2</sub> solubility<br>2. Improving filler distribution                                      | 2018 <sup>157</sup>     |                         |                |         |        |        |                                          |                                 |       |       |    |                                        |                                                               |                                                                                                                   |                     |         |                     |       |       |    |                                         |                         |                |         |        |        |                                          |                                 |       |       |    |                                        |                                                               |                                                                                                                   |                     |        |                     |       |      |    |                                         |                         |                |         |        |        |                                          |                                 |       |       |    |                                        |                                               |                                                                                                                   |                     |        |                     |       |      |    |                                         |                         |                |         |        |        |                                          |                                 |       |       |    |                                        |                                               |                                                                                                                   |                     |        |                    |       |      |    |                                        |                         |                |         |        |        |                                          |                                 |      |       |    |   |                                               |                                                                                                                   |                     |        |                  |      |      |    |   |                         |            |         |       |        |                                          |                |      |       |    |   |                                               |                                                                                                                   |                     |       |                  |      |      |    |   |                         |            |         |       |        |                                          |                |      |       |    |   |                          |                                                                                      |                     |       |        |      |     |    |   |      |            |         |       |        |                                          |                |      |    |    |   |                          |                                                                                      |                     |       |        |     |    |    |   |      |            |         |       |        |                                          |                |      |    |    |   |                          |                                                                              |                     |       |        |     |    |   |   |      |     |         |       |        |                                  |

Table S3. (continued)

| Filler                 | Polymer         | The third component    | Loading of filler | Loading of the third component | Feed gas                                                                             | Operation conditions | CO <sub>2</sub> permeability (Barrer) | CO <sub>2</sub> /CH <sub>4</sub> selectivity | CO <sub>2</sub> /N <sub>2</sub> selectivity | CO <sub>2</sub> /H <sub>2</sub> selectivity | Methodology                                                       | Role of the third component                                                                                                          | Published year and ref. |
|------------------------|-----------------|------------------------|-------------------|--------------------------------|--------------------------------------------------------------------------------------|----------------------|---------------------------------------|----------------------------------------------|---------------------------------------------|---------------------------------------------|-------------------------------------------------------------------|--------------------------------------------------------------------------------------------------------------------------------------|-------------------------|
| ZIF-8                  | ODPA-TMPDA      | CuBDC nanosheet        | 10 wt%            | 0                              | CO <sub>2</sub> /CH <sub>4</sub> (50/50)                                             | 25 °C, 0.1 MPa       | 144                                   | 37                                           | -                                           | -                                           | Direct physical blending                                          | Improving CO <sub>2</sub> diffusion selectivity                                                                                      | 2018 <sup>158</sup>     |
|                        |                 |                        | 10 wt%            | 2 wt%                          |                                                                                      |                      | 131                                   | 47                                           | -                                           | -                                           |                                                                   |                                                                                                                                      |                         |
|                        |                 |                        | 0                 | 2 wt%                          |                                                                                      |                      | 99                                    | 43                                           | -                                           | -                                           |                                                                   |                                                                                                                                      |                         |
| GO                     | Matrimid® 5218  | UiO-66-NH <sub>2</sub> | 1 wt%             | 0                              | CO <sub>2</sub> , N <sub>2</sub>                                                     | 25 °C, 0.3 MPa       | 3.15                                  | -                                            | 64.3                                        | -                                           | <i>In-situ</i> growth of UiO-66-NH <sub>2</sub> on GO nanosheets  | 1. Providing additional transport paths;<br>2. Improving filler distribution                                                         | 2019 <sup>171</sup>     |
|                        |                 |                        | 5 wt%             | NA                             |                                                                                      |                      | 7.28                                  | -                                            | 52                                          | -                                           |                                                                   |                                                                                                                                      |                         |
| GO                     | Ethyl cellulose | ZIF-8                  | 1.1 wt%           | 0                              | CO <sub>2</sub> , N <sub>2</sub>                                                     | 25 °C, 0.2 MPa       | 75                                    | -                                            | 30                                          | -                                           | <i>In-situ</i> growth of ZIF-8 on GO surface                      | 1. Providing additional transport paths;<br>2. Improving filler distribution                                                         | 2019 <sup>172</sup>     |
|                        |                 |                        | 20 wt%            | NA                             |                                                                                      |                      | 203.3                                 | -                                            | 33.4                                        | -                                           |                                                                   |                                                                                                                                      |                         |
| UiO-66-NH <sub>2</sub> | PSF             | TpPa-1                 | 5 wt%             | 0                              | CO <sub>2</sub> /CH <sub>4</sub> (50/50)                                             | 25 °C, 0.1 MPa       | 8.3                                   | 22.1                                         | -                                           | -                                           | <i>In-situ</i> growth of TpPa-1 on UiO-66-NH <sub>2</sub> surface | Eliminating interfacial voids                                                                                                        | 2019 <sup>166</sup>     |
|                        |                 |                        | 5 wt%             | 22 wt% of filler               |                                                                                      |                      | 7.1                                   | 46.7                                         | -                                           | -                                           |                                                                   |                                                                                                                                      |                         |
| PEG 200                | Matrimid® 5218  | ZIF-8                  | 4 wt%             | 0                              | CO <sub>2</sub> /CH <sub>4</sub> (50/50)                                             | 25 °C, 0.8 MPa       | 27.5                                  | 24.3                                         | -                                           | -                                           | Direct physical blending                                          | Providing additional transport paths                                                                                                 | 2019 <sup>150</sup>     |
|                        |                 |                        | 4 wt%             | 30 wt%                         |                                                                                      |                      | 33                                    | 15.4                                         | -                                           | -                                           |                                                                   |                                                                                                                                      |                         |
| Piperazine glycinate   | PVA             | ZIF-8                  | 30 wt%            | 0                              | CO <sub>2</sub> /N <sub>2</sub> (20/80)                                              | 95 °C, 0.25 MPa      | 180                                   | -                                            | 210                                         | -                                           | Direct physical blending                                          | Providing additional transport paths                                                                                                 | 2019 <sup>151</sup>     |
|                        |                 |                        | 30 wt%            | 5 wt%                          |                                                                                      |                      | 328                                   | -                                            | 370                                         | -                                           |                                                                   |                                                                                                                                      |                         |
| MCM-41                 | PDMS            | Carbon                 | 30 wt%            | 0                              | CO <sub>2</sub> /H <sub>2</sub> (50/50)                                              | 25 °C, 1.0 MPa       | 59                                    | -                                            | -                                           | 2.4                                         | Encapsulation                                                     | Increasing CO <sub>2</sub> solubility                                                                                                | 2013 <sup>174</sup>     |
|                        |                 |                        | 30 wt%            | 18.7 wt% of filler             |                                                                                      |                      | 42                                    | -                                            | -                                           | 6.0                                         |                                                                   |                                                                                                                                      |                         |
| MCM-41                 | Matrimid® 9725  | Carbon                 | 30 wt%            | 0                              | CO <sub>2</sub> /N <sub>2</sub> (50/50),<br>CO <sub>2</sub> /CH <sub>4</sub> (50/50) | 35 °C, 0.9 MPa       | ~22                                   | ~29                                          | ~29.5                                       | -                                           | Encapsulation                                                     | Increasing CO <sub>2</sub> solubility                                                                                                | 2015 <sup>175</sup>     |
|                        |                 |                        | 30 wt%            | 23.3 wt% of filler             |                                                                                      |                      | ~26                                   | 38.1                                         | 37.6                                        | -                                           |                                                                   |                                                                                                                                      |                         |
| CNT                    | Matrimid® 5218  | GO                     | 10 wt%            | 0                              | CO <sub>2</sub> , CH <sub>4</sub> , N <sub>2</sub>                                   | 30 °C, 0.2 MPa       | 10.29                                 | 27.8                                         | 26.4                                        | -                                           | Direct physical blending                                          | CNT: providing additional transport paths;<br>GO: increasing CO <sub>2</sub> diffusion selectivity;<br>Improving filler distribution | 2015 <sup>176</sup>     |
|                        |                 |                        | 5 wt%             | 5 wt%                          |                                                                                      |                      | 38.07                                 | 84.6                                         | 81.0                                        | -                                           |                                                                   |                                                                                                                                      |                         |
|                        |                 |                        | 0                 | 10 wt%                         |                                                                                      |                      | 6.46                                  | 70.3                                         | 64.6                                        | -                                           |                                                                   |                                                                                                                                      |                         |
| Halloysite nanotubes   | Pebax 1657      | Porous reduced GO      | 0.15 wt%          | 0                              | CO <sub>2</sub> , N <sub>2</sub>                                                     | 30 °C, 0.3 MPa       | 71                                    | -                                            | 42                                          | -                                           | Direct physical blending                                          | Increasing CO <sub>2</sub> diffusion selectivity                                                                                     | 2018 <sup>177</sup>     |
|                        |                 |                        | 0.15 wt%          | 0.02 wt%                       |                                                                                      |                      | 124                                   | -                                            | 118                                         | -                                           |                                                                   |                                                                                                                                      |                         |
| PEG-MEA                | Pebax 1657      | GO                     | 50 wt%            | 0                              | CO <sub>2</sub> , N <sub>2</sub>                                                     | 35 °C, 0.1 MPa       | ~565                                  | -                                            | ~28.5                                       | -                                           | Direct physical blending                                          | Increasing CO <sub>2</sub> diffusion selectivity                                                                                     | 2019 <sup>178</sup>     |
|                        |                 |                        | 50 wt%            | 0.3 wt%                        |                                                                                      |                      | ~605                                  | -                                            | ~56                                         | -                                           |                                                                   |                                                                                                                                      |                         |
| Porous reduced GO      | Pebax 1657      | Halloysite nanotubes   | 0.02 wt%          | 0                              | CO <sub>2</sub> , N <sub>2</sub>                                                     | 30 °C, 0.3 MPa       | ~77                                   | -                                            | ~78                                         | -                                           | Direct physical blending                                          | 1. Improving filler distribution;<br>2. Providing additional transport paths                                                         | 2018 <sup>177</sup>     |
|                        |                 |                        | 0.02 wt%          | 0.15 wt%                       |                                                                                      |                      | 124                                   | -                                            | 118                                         | -                                           |                                                                   |                                                                                                                                      |                         |

Table S3. (continued)

| Filler                    | Polymer    | The third component         | Loading of filler | Loading of the third component | Feed gas                                                                             | Operation conditions            | CO <sub>2</sub> permeability (Barrer) | CO <sub>2</sub> /CH <sub>4</sub> selectivity | CO <sub>2</sub> /N <sub>2</sub> selectivity | CO <sub>2</sub> /H <sub>2</sub> selectivity | Methodology                  | Role of the third component                      | Published year and ref. |
|---------------------------|------------|-----------------------------|-------------------|--------------------------------|--------------------------------------------------------------------------------------|---------------------------------|---------------------------------------|----------------------------------------------|---------------------------------------------|---------------------------------------------|------------------------------|--------------------------------------------------|-------------------------|
| MWCNT                     | Pebax 1657 | mesoporous SiO <sub>2</sub> | 10 wt%            | 0                              | CO <sub>2</sub> /CH <sub>4</sub> (10/90),<br>CO <sub>2</sub> /N <sub>2</sub> (10/90) | 25 °C, 0.2 MPa, humid condition | 355                                   | ~29                                          | ~38                                         | -                                           | SiO <sub>2</sub> grow on CNT | Eliminating interfacial voids                    | 2018 <sup>179</sup>     |
|                           |            |                             | 10 wt%            | NA                             |                                                                                      |                                 | ~370                                  | 39                                           | 58                                          | -                                           |                              |                                                  |                         |
| [emim][TF <sub>2</sub> N] | poly(IL)   | SAPO-34                     | 20 wt%            | 0                              | CO <sub>2</sub> , CH <sub>4</sub>                                                    | 21 °C, 0.1 MPa                  | 22.9                                  | 26                                           | -                                           | -                                           | Direct physical blending     | Increasing CO <sub>2</sub> diffusion selectivity | 2019 <sup>180</sup>     |
|                           |            |                             | 16 wt%            | 20 wt%                         |                                                                                      |                                 | 47                                    | 42                                           | -                                           | -                                           |                              |                                                  |                         |
